# Supplementary material
Source: PubMed Central journal article supplement (PMC3338147)

# ***Fluorosugar Chain Termination Agents as Probes of the Sequence Specificity of a Carbohydrate Polymerase***

Christopher D. Brown<sup>†,§</sup>, Max S. Rusek<sup>†</sup> and Laura L. Kiessling<sup>†,‡</sup>.

<sup>†</sup>*Department of Chemistry, University of Wisconsin--Madison, 1101 University Ave., Madison, WI 53706*

<sup>‡</sup>*Department of Biochemistry, University of Wisconsin--Madison, 433 Babcock Dr., Madison, WI 53706*

<sup>§</sup>*University of Wisconsin School of Medicine and Public Health, 750 Highland Ave., Madison, WI 53705*

CORRESPONDING AUTHOR [kiessling@chem.wisc.edu](mailto:kiessling@chem.wisc.edu)

Supporting Information:

- I. General Procedures and Materials**
- II. Experimental Procedures**
- III. Supplemental Figures**
- IV. Spectral Data**

- I. General Procedures and Materials**

All compounds were purchased from Sigma Aldrich (Milwaukee, WI) or Fischer Scientific (Pittsburgh, PA). Tetrahydrofuran (THF) and toluene were distilled from sodium/benzophenone ketyl. Diisopropylethylamine (DIEA), triethylamine (TEA) and dichloromethane (CH<sub>2</sub>Cl<sub>2</sub>) were distilled from calcium hydride. All reactions were run under nitrogen atmosphere unless otherwise stated. Analytical thin layer chromatography (TLC) was carried out on E. Merck (Darmstadt) TLC plates pre-coated with silica gel 60 F254 (250 μm layer thickness). Analyte visualization was accomplished using a UV lamp and charring with p-anisaldehyde solution. Flash chromatography was performed on Scientific Adsorbents Incorporated silica gel (32-63 μm, 60 Å pore size) using distilled reagent grade hexanes and ACS grade ethyl acetate (EtOAc) or methanol, CH<sub>2</sub>Cl<sub>2</sub> and acetic acid. UDP sugars were purified by semi-preparative HPLC using a Dionex carbopak column eluting in a 300mM triethylammonium acetate buffer at neutral pH. <sup>1</sup>H, <sup>19</sup>F, <sup>31</sup>P and <sup>13</sup>C nuclear magnetic resonance (NMR) spectra were recorded on Bruker AC-300 or Varian Inova-500 spectrometers, and chemical shifts are reported relative to tetramethylsilane or residual solvent peaks in parts per million (CHCl<sub>3</sub>: <sup>1</sup>H: 7.26, <sup>13</sup>C: 77.0; MeOH: <sup>1</sup>H: 3.31, <sup>13</sup>C: 49.15; D<sub>2</sub>O: <sup>1</sup>H: 4.79, <sup>13</sup>C: referenced to <sup>1</sup>H. <sup>19</sup>F and <sup>31</sup>P referenced to <sup>1</sup>H) Peak multiplicity is reported as singlet (s), doublet (d), doublet of doublets (dd), triplet (t), doublet of triplets (dt), etc. High resolution electrospray ionization mass spectra (HRESI-MS) were obtained on a Micromass LCT. Polymerization reactions consisted of 10 μL total volume containing final concentrations of 0.2 μM His<sub>6</sub>-Glt2, approximately 200 μM acceptor, 1.0 mM UDP donor sugar in 50 mM Hepes, pH 7.0, 25 mM MgCl<sub>2</sub>, and 100 mM NaCl. Reactions were incubated at room temperature for 18 h, then quenched with 30 μL of a 1:1 mixture of

CHCl<sub>3</sub>/MeOH. Quenched reaction mixtures were evaporated to dryness under vacuum in a SpeedVac SC100 (Varian) then resuspended in 10  $\mu$ L of 50% MeCN in MQ water for MALDI MS analysis. Samples for MALDI MS analysis were spotted as a 1:3 mixture with  $\alpha$ -cyano-4-hydroxycinnamic acid matrix and spectra were recorded in positive linear mode using a Bruker Ultraflex III mass spectrometer.

## II. Experimental Procedures

**2,3-di-*O*-benzyl-6-deoxy-6-iodo- $\beta$ -D-methylgalactopyranose (5):** 2,3-di-*O*-benzyl- $\beta$ -D-methylgalactopyranose (4.4 g, 11.8 mmol) was dissolved in dry THF (100 mL) under N<sub>2</sub> atmosphere. Triphenylphosphine (4.6 g, 17.6 mmol) and imidazole (2.5 g, 36.6 mmol). The flask was fitted with a flame dried condenser and the contents warmed to 50 °C. A solution of iodine (4.5 g, 17.6 mmol) in dry THF (20 mL) was added dropwise over 2h. Once the color of the reaction was a persistent yellow the contents were cooled to RT, quenched with saturated Na<sub>2</sub>S<sub>2</sub>O<sub>3</sub> solution until the yellow color dissipated. THF was removed *in vacuo* then the contents were diluted with water, extracted 2x into DCM, dried over MgSO<sub>4</sub>, filtered and concentrated *in vacuo*. Purification by silica chromatography (gradient 10%  $\rightarrow$  40% EtOAc in Hex) gave 4.61 g of a colorless oil (81%). <sup>1</sup>H NMR (300 MHz, CDCl<sub>3</sub>,  $\delta$  (ppm)) 7.42 – 7.22 (m, 10H, Ar-H), 4.89 (d, *J*= 11.1, 1H, OCH<sub>2</sub>Ph), 4.73 (m, 3H, OCH<sub>2</sub>Ph, OCH<sub>2</sub>Ph), 4.26 (d, *J*= 7.7, 1H, H-1), 4.11 (dd, *J*= 3.3, 0.9, 1H, H-4), 3.59 (s, 3H, OCH<sub>3</sub>), 3.61 – 3.46 (m, 2H, H-2, H-5), 3.50 (dd, *J*= 9.4, 3.5, 1H, H-3), 3.41 (m, 2H, H-6a, H-6b); <sup>13</sup>C NMR (75 MHz, CDCl<sub>3</sub>,  $\delta$  (ppm)) 138.75, 137.88, 128.73, 128.53, 128.24, 128.07, 127.85, 124.71, 80.59, 78.70, 75.24, 74.87, 72.96, 67.41, 57.28.

**2,3-di-*O*-benzyl-5-eno- $\beta$ -D-methyl galactofuranose (6):** Iodogalactopyranose **5** (4.61 g, 9.52 mmol) was dissolved in anhydrous THF (25 mL) under N<sub>2</sub> atmosphere and chilled to -78 °C. A 2.5M solution of n-butyllithium in hexanes (8.4 mL, 20.9 mmol) was added and the reaction was warmed to -40 °C over 1hr and then stirred for another 2h. The remaining n-butyllithium was quenched with a 10% w/v solution of NH<sub>4</sub>Cl, the product was extracted 3x into ether, the organics dried over MgSO<sub>4</sub>, filtered and concentrated *in vacuo*. The resulting oil was dissolved in DCM (16mL) and treated with 12M NaOH (2 mL). A large stir bar was used to vigorously mix the biphasic solution. Methyl iodide (1.5 mL, 24.1 mmol) and tetrabutylammonium iodide (358 mg, .97 mmol) were added and the reaction stirred at RT overnight. The reaction was diluted with DCM, washed 1x with 5% citric acid, 1x with H<sub>2</sub>O, and 1x with brine, dried over MgSO<sub>4</sub>, filtered and concentrated *in vacuo*. Purification by silica gel chromatography (gradient 5%  $\rightarrow$  20% EtOAc) allowed isolation of the  $\beta$  anomer (1.54 g, 47%). Characterization of  $\beta$  anomer: <sup>1</sup>H NMR (300 MHz, CDCl<sub>3</sub>,  $\delta$  (ppm)) 7.41 – 7.21 (m, 10H, Ar-H), 5.92 (ddd, *J*= 17.2, 10.3, 7.1, 1H, H-5), 5.41 (dt, *J*= 17.2, 1.0, 1H, H-6 *trans*), 5.24 (dt, *J*= 10.3, 1.0, 1H, H-6 *cis*), 4.92 (s, 1H, H-1), 4.56 (s, 2H, OCH<sub>2</sub>Ph), 4.53 (ABq, *J*=11.7, 2H, OCH<sub>2</sub>Ph), 4.43 (t, *J*= 6.9, 1H, H-4), 4.00 (dd, *J*=3.4, 1.1, 1H, H-2), 3.77 (dd, *J*= 7.0, 3.4, 1H, H-3), 3.39 (s, 3H, OCH<sub>3</sub>); <sup>13</sup>C NMR (75 MHz, CDCl<sub>3</sub>,  $\delta$  (ppm)) 138.05, 137.81, 136.23, 128.69, 128.62, 128.13, 128.03, 118.32, 107.27, 88.88, 87.67, 82.36, 72.56, 72.32, 55.13

**5,6-anhydro-2,3-di-*O*-benzyl- $\beta$ -D-methyl galactofuranose and 5,6-anhydro-2,3-di-*O*-benzyl- $\beta$ -L-methyl altrofuranose (7):** 5-eno- $\beta$ -D-methyl galactofuranoside **6** (1.1 g, 3.23 mmol) was dissolved in reagent grade DCM (32 mL) and chilled to 0 °C. mCPBA (2.17 g, 9.69 mmol) was added and the contents stirred at RT for 2 days. The reaction was quenched with saturated

$\text{Na}_2\text{S}_2\text{O}_3$  and  $\text{NaHCO}_3$  solution and extracted 1x into DCM. The organics were dried over  $\text{MgSO}_4$ , filtered and concentrated *in vacuo*. Purification by silica gel chromatography (gradient 5%  $\rightarrow$  20% EtOAc in hexane) gave 947 mg of colorless oil as a 1:1 diastereomeric mixture of epoxides (97%).  $^1\text{H}$  NMR (300 MHz,  $\text{CDCl}_3$ ,  $\delta$  (ppm)) 7.41 – 7.21 (m, 20H, Ar-H), 4.95 (d,  $J$  = 3.7, 2H, H-1g, H-1a), 4.63 – 4.44 (m, 8H, 2x  $\text{OCH}_2\text{Phg}$ , 2x  $\text{OCH}_2\text{Pha}$ ), 4.03 – 3.97 (m, 2H, H-2g, H-2a), 3.96 – 3.88 (m, 2H, H-3g, H-3a), 3.80 (t,  $J$  = 6.6, 2H, H-4g, H-4a), 3.39 (s, 3H,  $\text{OCH}_3$ ), 3.38 (s, 3H,  $\text{OCH}_3$ ), 3.11 (m, 2H, H-5g, H-5a), 2.75 (m, 4H, H-6g, H-6a);  $^{13}\text{C}$  NMR (75 MHz,  $\text{CDCl}_3$ ,  $\delta$  (ppm)) 137.79, 137.64, 128.70, 128.69, 128.50, 128.26, 128.15, 128.10, 128.06, 107.69, 107.57, 101.31, 88.09, 87.91, 84.62, 83.82, 82.14, 82.02, 72.65, 72.34, 72.22, 72.15, 55.28, 55.21, 52.17, 51.65, 45.65, 44.03

**5,6-anhydro-2,3-di-O-benzyl-beta-D-methyl galactofuranose (8) and 2,3-di-O-benzyl-beta-L-methylaltrofuranose (9):** (*S,S*)-*N,N'*-Bis(3,5-di-tert-butylsalicylidene)-1,2-

cyclohexanediaminocobalt (II) (334mg, .5528 mmol) was dissolved in 200  $\mu\text{L}$  of reagent grade DCM and treated with glacial acetic acid (25  $\mu\text{L}$ , .442 mmol). The solution stirred open to air for 30 minutes. DCM was removed *in vacuo*. A solution of epoxide 7 (1.97g, 5.528 mmol) in THF (8mL, 0.7M) and water (50  $\mu\text{L}$ , 2.763 mmol) was added to the brown residue and the reaction was capped and stirred overnight. The reaction was stopped when TLC indicated 50% conversion to diol. Quenched with 5 mL of 2M  $\text{NH}_3$  in MeOH and stirred for 30 minutes. Concentrated *in vacuo*. Purified by silica gel chromatography (DCM  $\rightarrow$  60% EtOAc in hexane, 10% stepwise gradient). Isolated 1.083 g (55%) of epoxide and 958mg (46%) of diol. Average isolated yields for three separate experiments were 48% for epoxide, 45% for diol.

Characterization of epoxide 8:  $^1\text{H}$  NMR (300 MHz,  $\text{CDCl}_3$ ,  $\delta$  (ppm)) 7.4-7.2 (m, 10H, Ar-H), 4.93 (s, 1H, H-1), 4.54 (ABq, 2H,  $J$  = 12.1,  $-\text{OCH}_2\text{Ph}$ ), 4.53 (ABq, 2H,  $J$  = 11.6 Hz,  $-\text{OCH}_2\text{Ph}$ ), 3.99 (dd,  $J$  = 3.1, 1.1, 1H, H-2), 3.93 (dd,  $J$  = 6.8, 2.9, 1H, H-3), 3.79 (dd,  $J$  = 6.7, 6.0, 1H, H-4), 3.37 (s, 3H,  $\text{OCH}_3$ ), 3.09 (ddd,  $J$  = 5.9, 4.1, 2.7, 1H, H-5), 2.74 (AB part of an ABX,  $J_{\text{AX}}$  = 4.1,  $J_{\text{BX}}$  = 2.7, 2H, H-6a, H-6b);  $^{13}\text{C}$  NMR (75 MHz,  $\text{CDCl}_3$ ,  $\delta$  (ppm)) 137.80, 137.64, 128.70, 128.69, 128.15, 128.05, 107.57, 88.11, 84.63, 82.02, 72.64, 72.33, 55.21, 52.16, 44.02; MS (EMM) $^+$ :  $m/z$ : 379.1503 ( $\text{M}+\text{Na}$ ) $^+$  ( $\text{M}+\text{Na}^+$  calcd 379.1516) Characterization of diol (#):  $^1\text{H}$  NMR (300 MHz,  $\text{CDCl}_3$ ,  $\delta$  (ppm)) 7.4 – 7.2 (m, 10H, Ar-H), 4.93 (s, 1H, H-1), 4.53 (ABq,  $J$  = 11.9, 2H,  $\text{OCH}_2\text{Ph}$ ) 4.50 (ABq,  $J$  = 11.8, 2H,  $\text{OCH}_2\text{Ph}$ ), 4.07 (m, 2H, H-2, H-3), 3.99 (broad s, 1H, H-4), 3.92 (m, 1H, H-5), 3.64 (m, 2H, H-6a, H-6b), 3.37 (2, 3H,  $\text{OCH}_3$ ), 2.56 (d,  $J$  = 3.9, 1H, 5-OH), 2.20 (t,  $J$  = 6.0, 1H, 6-OH);  $^{13}\text{C}$  NMR (75 MHz,  $\text{CDCl}_3$ ,  $\delta$  (ppm)) 137.56, 137.38, 128.75, 128.73, 128.36, 128.28, 128.26, 128.22, 107.39, 87.56, 82.76, 82.51, 72.49, 72.18, 71.51, 63.57, 55.15; MS (EMM) $^+$ :  $m/z$ : 397.1634 ( $\text{M}+\text{Na}$ ) $^+$  ( $\text{M}+\text{Na}^+$  calcd. 397.1622)

**2,3-di-O-benzyl-6-deoxy-6-fluoro- $\beta$ -D-methyl galactofuranose:** Epoxide 8 (45 mg, .126 mmol) was placed in a 3mL Eppendorf tube and dissolved in HF-triethylamine (180  $\mu\text{L}$ , .7M). The tube was capped, warmed to 70  $^\circ\text{C}$  using a sand bath and incubated for 4 days. The contents were cooled to room temperature, diluted with acetone and carefully filtered through a silica plug. Concentrated *in vacuo*. Purified by silica gel chromatography (5%  $\rightarrow$  20% EtOAc in hexane gradient). Isolated 44 mg of fluoroalcohol as a pale yellow oil (94%).  $^1\text{H}$  NMR (300 MHz,  $\text{CDCl}_3$ ,  $\delta$  (ppm)) 7.4 – 7.2 (m, 10H, Ar-H), 4.54 (m, 5H, 2x  $\text{OCH}_2\text{Ph}$ , H-6a), 4.34 (1/2 of the AB part of an ABMX, 1H, H-6b), 4.14 (dd,  $J$  = 5.8, 2.9, 1H, H-4), 4.05 (dd,  $J$  = 5.7, 2.0, 1H, H-3), 3.98 (d,  $J$  = 1.5, 1H, H-2) 3.90 (dtd,  $J$  = 14.3, 5.9, 3.1, 1H, H-5), 3.37 (s, 3H,  $\text{OCH}_3$ ), 2.23 (broad s, 1H, 5-OH);  $^{19}\text{F}$  NMR (280 MHz,  $\text{CDCl}_3$ ,  $\delta$  (ppm)) -233.7 (td, 48.7, 14.1);  $^{13}\text{C}$  NMR (75

MHz, CDCl<sub>3</sub>, δ (ppm)) 137.71, 137.33, 128.74, 128.29, 128.23, 128.19, 128.16, 107.72, 87.11, 85.25, 83.17, 82.99, 81.31, 81.24, 72.62, 72.16, 70.01, 69.74, 55.18; MS (EMM)<sup>+</sup>: *m/z*: 399.1579 (M+Na)<sup>+</sup> (M+Na<sup>+</sup> calcd. 399.1579)

**6-deoxy-6-fluoro-beta-D-methyl galactofuranose (10):** 2,3-di-*O*-benzyl-6-deoxy-6-fluoro-β-D-methyl galactofuranose (44 mg, .117 mmol) was dissolved in reagent grade methanol (4.5 mL, .025M) and treated with 20 wt% palladium hydroxide on carbon (44mg). The flask was evacuated and backfilled with H<sub>2</sub> from a balloon three times. Stirred at STP overnight. Filtered through celite, washed with methanol and concentrated in vacuo. Isolated 22 mg of a colorless oil (96%). <sup>1</sup>H NMR (300 MHz, CDCl<sub>3</sub>, δ (ppm)) 4.91 (s, 1H, H-1), 4.55 (AB part of an ABMX, J = , 2H, H-6a, H-6b), 4.5 (m, 3H, H-2, H-3, H-5), 4.1 (s, 1H, H-4), 3.40 (s, 3H, OCH<sub>3</sub>); <sup>19</sup>F NMR (280 MHz, CDCl<sub>3</sub>, δ (ppm)) -233.5 (td, 48.1, 14.0) <sup>13</sup>C NMR (75 MHz, CD<sub>3</sub>OD, δ (ppm)) 110.72, 86.51, 84.27, 83.84 (d, J = 27), 83.30, 78.68, 70.48 (d, J = 89), 55.45; MS (EMM)<sup>+</sup>: *m/z*: 219.0630 (M+Na)<sup>+</sup> (M+Na<sup>+</sup> calcd. 219.0640)

**2,3,5-tri-*O*-benzoyl-6-deoxy-6-fluoro-β-D-methyl galactofuranose:** Fluoro Galf 10 (250mg, 1.274 mmol) was dissolved in dry pyridine (12 mL) under N<sub>2</sub> atmosphere and chilled to 0 °C. Benzoyl chloride (565 μL) was added dropwise over 5 minutes. The contents were warmed to RT and stirred for 3 hours. The reaction was diluted with toluene and azeotroped 3x. Placed on high vacuum line to dry. Purified by silica chromatography (5% → 20% EtOAc in hexane). Isolated 560 mg of white crystalline powder (86%). <sup>1</sup>H NMR (300 MHz, CDCl<sub>3</sub>, δ (ppm)) 8.1 (dd, J = 9.1, 7.2, 4H, Ar-H), 7.90 (d, J = 7.2, 2H, Ar-H), 7.58 (m, 3H, Ar-H), 7.42 (t, J = 7.8, 2H, Ar-H), 7.30 (t, J = 7.5, 4H, Ar-H), 5.85 (dq, J = 16.0, 5.2, 1H, H-5), 5.59 (d, J = 5.4, 1H, H-3), 5.45 (d, J = 0.9, 1H, H-2), 5.20 (s, 1H, H-1), 4.80 (ddq, J = 46.7, 9.8, 5.9, 2H, H-6a, H-6b), 4.63 (dd, J = 5.2, 3.9, 1H, H-4), 3.47 (s, 3H, OCH<sub>3</sub>); <sup>19</sup>F NMR (280 MHz, CDCl<sub>3</sub>, δ (ppm)) -235.5 (td, 46.6, 16.0) <sup>13</sup>C NMR (75 MHz, CDCl<sub>3</sub>, δ (ppm)) 165.92, 165.87, 165.71, 133.72, 133.61, 133.56, 130.22, 130.18, 130.05, 129.54, 129.20, 128.64, 107.01, 82.50, 82.38, 80.51, 80.44, 80.20, 77.75, 70.99, 70.71, 55.18; MS (EMM)<sup>+</sup>: *m/z*: 531.1450 (M+Na<sup>+</sup> calcd. 531.1426)

**1-*O*-acetyl-2,3,5-tri-*O*-benzoyl-6-deoxy-6-fluoro-β-D-methyl galactofuranose:** 2,3,5-tri-*O*-benzoyl-6-deoxy-6-fluoro-β-D-methyl galactofuranose (100 mg, .197 mmol) was placed in a flame-dried round bottom flask and treated with a 1.4% v/v solution of concentrated H<sub>2</sub>SO<sub>4</sub> in acetic anhydride (2 mL, .1M). The reaction stirred at RT for 2 hours. Quenched with saturated NaHCO<sub>3</sub> solution, diluted with brine and extracted into DCM 3x. Dried organic layer over MgSO<sub>4</sub>, filtered and concentrated *in vacuo*. Azeotroped remaining acetic acid with toluene 2x. Purified by silica gel chromatography (5% → 20% EtOAc in hexane) to give 97 mg of white crystalline solid (92%, 5:1 mix of β:α). <sup>1</sup>H NMR (300 MHz, CDCl<sub>3</sub>, δ (ppm)) 8.10 (m, 6.5H, Ar-H), 7.90 (d, J = 7.5, 2H, Ar-H), 7.6 – 7.2 (m, 13H, Ar-H), 6.61 (d, J = 4.8, .2H, H-1α), 6.50 (s, 1H, H-1β), 6.17 (t, J = 6.6, .2H, H-2α), 5.89 (dq, J = 16.2, 5.0, 1H, H-5β), 5.75 (m, .4H, H-3α, H-5α), 5.63 (d, J = 4.7, 1H, H-3β), 5.59 (s, 1H, H-2β), 5.0 – 4.8 (m, ~4H, H-4α, H-4-β, H-6αα, H-6αβ, H-6βα, H-6ββ), 2.20 (s, 3H, C(O)CH<sub>3</sub> β), 2.13 (s, .6H, C(O)CH<sub>3</sub> α); <sup>19</sup>F NMR (280 MHz, CDCl<sub>3</sub>, δ (ppm)) -235.5 (td, J = 46.3, 15.7, β anomer), -237.5 (td, J = 46.1, 19.3, α anomer); <sup>13</sup>C NMR (75 MHz, CDCl<sub>3</sub>, δ (ppm)) 169.35, 165.84, 165.72, 165.50, 133.92, 133.80, 133.65, 130.24, 130.10, 129.34, 129.07, 128.89, 128.77, 128.68, 128.65, 99.55, 93.65, 82.85, 82.79, 82.27, 81.64, 79.97, 77.68, 76.49, 70.74, 70.46, 21.29, 21.23; MS (EMM)<sup>+</sup>: *m/z*: 559.1380 (M+Na<sup>+</sup> calcd. 559.1375)

**Dibenzyl 2,3,5-tri-*O*-benzoyl-6-deoxy-6-fluoro- $\alpha$ -D-galactofuranose monophosphate:** 1-*O*-acetyl-2,3,5-tri-*O*-benzoyl-6-deoxy-6-fluoro-D-galactofuranose (100 mg, .186 mmol) was placed in a flame dried round bottom flask and dissolved in dry DCM (2.0 mL) under N<sub>2</sub> atmosphere. The solution was chilled to 0 °C and treated with a 33 wt% HBr in AcOH solution (120  $\mu$ L). After stirring for 20 minutes the reaction was warmed to RT and stirred for 4 hours. Azeotroped using freshly distilled toluene 3x to isolate the crude glycosyl bromide as an orange oil. The oil was dissolved in dry toluene (1.0 mL) under N<sub>2</sub>. The solution was added dropwise over 30 minutes to a stirring solution of dibenzyl phosphate (208 mg) in dry toluene (1.0 mL). The contents stirred at RT for 2.5 hours. Concentration *in vacuo* followed by silica gel chromatography (12% EtOAc in toluene) allowed isolation of 97 mg of the  $\alpha$ -anomer as a slightly cloudy viscous oil (69%). <sup>1</sup>H NMR (300 MHz, CDCl<sub>3</sub>,  $\delta$  (ppm)) 8.14 (d, J = 7.0, 2H, Ar-H), 8.0 (t, J = 7.1, 4H, Ar-H), 7.60 – 7.00 (m, 19, Ar-H), 6.32 (dd, J = 5.6, 4.7, 1H, H-1), 6.13 (t, J = 7.2, 1H, H-3), 5.70 (m, 2H, H-2, H-5), 5.05 – 4.55 (m, 7H, 2x OCH<sub>2</sub>Ph, H-6a, H-6b, H-4); <sup>19</sup>F NMR (280 MHz, CDCl<sub>3</sub>,  $\delta$  (ppm)) -237.2 (td, J = 46.8, 17.3); <sup>31</sup>P NMR (122 MHz, CDCl<sub>3</sub>,  $\delta$  (ppm)) -1.88 (m); <sup>13</sup>C NMR (75 MHz, CDCl<sub>3</sub>,  $\delta$  (ppm)) 165.80, 165.76, 165.72, 135.65, 135.54, 133.92, 133.84, 133.58, 130.33, 130.24, 130.15, 130.04, 129.34, 128.87, 128.73, 128.65, 128.00, 127.89, 97.85, 97.79, 81.69, 79.37, 79.29, 76.68, 73.43, 71.53, 71.25, 69.62, 69.55, 69.45; MS (EMM)<sup>+</sup>: *m/z*: 777.1890 (M+Na<sup>+</sup> calcd. 777.1872)

**Triethylammonium 2,3,5-tri-*O*-benzoyl-6-deoxy-6-fluoro- $\alpha$ -D-galactofuranose monophosphate:** Dibenzyl 2,3,5-tri-*O*-benzoyl-6-deoxy-6-fluoro- $\alpha$ -D-galactofuranose monophosphate (40 mg, .053 mmol) was dissolved in ethyl acetate (500  $\mu$ L, .1M) and triethylamine (50  $\mu$ L). 10% Pd on carbon (20 mg) was added. The stoppered flask was evacuated and back filled with H<sub>2</sub> from a balloon. The contents stirred at STP for 90 minutes. The reaction was filtered through celite, washed with ethyl acetate and concentrated *in vacuo*. Isolated 33 mg of cloudy, viscous oil (90%). <sup>1</sup>H NMR (300 MHz, CDCl<sub>3</sub>,  $\delta$  (ppm)) 8.10 (t, J = 7.2, 4H, Ar-H), 7.90 (d, J = 7.2, 2H, Ar-H), 7.5 – 7.2 (m, 9H, Ar-H), 6.21 (t, J = 7.2, 1H, H-1), 6.13 (dd, J = 7.4, 4.5, 1H, H-3), 5.69 (dq, J = 18.7, 4.8, 1H, H-5), 5.60 (ddd, J = 7.7, 4.5, 1.4), 5.00 (m, 2H, H-6a, H-6b), 4.54 (t, J = 5.4, 1H, H-4), 2.85 (q, J = 7.2, NCH<sub>2</sub>CH<sub>3</sub>), 1.2 (t, J = 7.3, NCH<sub>2</sub>CH<sub>3</sub>); <sup>19</sup>F NMR (280 MHz, CDCl<sub>3</sub>,  $\delta$  (ppm)) -238.1 (td, J = 48.7, 18.9); <sup>31</sup>P NMR (122 MHz, CDCl<sub>3</sub>,  $\delta$  (ppm)) -1.88 (d, J = 7.9); <sup>13</sup>C NMR (75 MHz, CDCl<sub>3</sub>,  $\delta$  (ppm)) 174.93, 66.03, 165.70, 133.43, 133.23, 133.16, 130.41, 130.03, 129.83, 129.54, 129.40, 128.50, 128.44, 128.26, 95.98, 82.61, 80.34, 74.16, 72.44, 72.19, 45.46, 8.57; MS (EMM)<sup>-</sup>: *m/z*: 573.0941 ([M-H]<sup>-</sup>, calcd. 573.0967)

**Tributylammonium 6-deoxy-6-fluoro- $\alpha$ -D-galactofuranose monophosphate:** Benzoylated Galf monophosphate (#) (42 mg, .06 mmol) was dissolved in a 5:2:1 mixture of methanol:water:triethylamine (2.3 mL) and warmed to 30 °C. The reaction stirred for 4 days. Concentrated *in vacuo* then azeotroped 3x with toluene. Purified by anion exchange chromatography (Biorad AG1-X8 resin, gradient elution 250 mM  $\rightarrow$  500 mM NH<sub>4</sub>HCO<sub>3</sub> solution) using a peristaltic pump. Column fractions were combined, frozen on dry ice and lyophilized. The residue was treated with ~200  $\mu$ L Dowex-50WX8-200 resin (pH 7, pretreated with 2.0M HNBu<sub>3</sub>Cl) for 4 hours. The resin was removed by filtration through a cotton plug and the filtrate was frozen on dry ice and lyophilized. Isolated 18 mg of fluffy white solid (56%, 1.1 equivalents of tributylammonium). <sup>1</sup>H NMR (300 MHz, D<sub>2</sub>O,  $\delta$  (ppm)) 5.45 (t, J = 4.8, 1H, H-1), 4.65 – 4.40 (AB part of an ABMX, J = 47.0, 5.7, 3.7, 2H, H-6a, H-6b), 4.21 (dd, J = 8.6, 7.2, 1H, H-3), 4.06 (ddd, J = 8.4, 4.3, 2.3, 1H, H-2), 3.88 (dtd, 20.8, 5.4, 3.9, 1H, H-5), 3.83 (dd, J = 7.2,

5.6, 1H, H-4), 3.10 (m, 7H), 1.65 (m, 7H), 1.38 (sextet,  $J = 7.3$ , 7H), 0.9 (t,  $J = 7.3$ , 10H);  $^{19}\text{F}$  NMR (280 MHz,  $\text{D}_2\text{O}$ ,  $\delta$  (ppm)) -235.6 (td,  $J = 46.9$ , 21.1);  $^{31}\text{P}$  NMR (122 MHz,  $\text{D}_2\text{O}$ ,  $\delta$  (ppm)) -0.3 (d,  $J = 3.5$ );  $^{13}\text{C}$  NMR (75 MHz,  $\text{D}_2\text{O}$ ,  $\delta$  (ppm)) 97.14 (d,  $J = 4.9$ ), 85.20, 82.98, 81.07 (d,  $J = 7.0$ ), 76.63 (d,  $J = 7.5$ ), 73.59, 70.76 (d,  $J = 19$ ), 52.85, 25.36, 19.43, 12.92; MS (EMM) $^-$ :  $m/z$ : 261.0176 ([M-H] $^-$ , calcd. 261.0181)

**Uridine diphosphate 6-deoxy-6-fluoro- $\alpha$ -D-galactofuranose (2):** A solution of tributylammonium UMP (16mg, .03 mmol) in anhydrous DMF (470  $\mu\text{L}$ ) was stirred with activated 4 Å molecular sieves under  $\text{N}_2$  for 1 hour. The molecular sieves were removed and the solution was treated with diisopropylethylamine (17  $\mu\text{L}$ , .1 mmol) and 1-methyl-3-benzenesulfonylimidazolium triflate (12.4 mg, 0.4 mmol) and stirred for 1 minute. The solution was added dropwise over 30 seconds to a solution of tributylammonium 6-deoxy-6-fluoro- $\alpha$ -D-galactofuranose monophosphate (10mg, .02 mmol) and  $\text{MgCl}_2$  (3mg, .03 mmol) in anhydrous DMF (220  $\mu\text{L}$ ) at 0 °C. The contents were raised to room temperature and stirred for 2 hours. The reaction was quenched with 1.0 mL of 100 mM ammonium acetate and washed 1x with 1.0 mL of DCM. The DCM was extracted with 1.0 mL of 100 mM ammonium acetate, the aqueous layers were combined, frozen on dry ice and stored at -20 °C until purification by HPLC. Purified by HPLC using a semiprep carboxypak dionex column, 300mM triethylammonium acetate, pH = 6.0-7.0, flow rate = 1mL/min. Collected peak eluting at 40 – 45 minutes, froze on dry ice and lyophilized to give a light brown solid.  $^1\text{H}$  NMR (500 MHz,  $\text{D}_2\text{O}$ ,  $\delta$  (ppm)) 7.98 (d,  $J = 8.3$ , 1H, H-5u), 5.99 (m, 2H, H-1r, H-6u) 5.67 (t,  $J = 4.2$ , 1H, H-1g) 4.62 (m, 2H, H-6ag, H-6bg) 4.15 – 4.42 (m, 7H, H-2g, H-2r, H-3g, H-3r, H-4r, H-5ar, H-5br) 4.01 (dq,  $J = 20.5$ , 5.0, 1H, H-5g) 3.91 (t,  $J = 7.5$ , 1H, H-4g);  $^{19}\text{F}$  NMR (280 MHz,  $\text{D}_2\text{O}$ ,  $\delta$  (ppm)) -234.8;  $^{13}\text{C}$  NMR (125 MHz,  $\text{D}_2\text{O}$ ,  $\delta$  (ppm)) 183.52, 168.86, 154.46, 144.27, 105.28, 100.30, 90.95, 87.08, 85.93, 85.85, 85.75, 83.82, 83.77, 79.33, 79.27, 76.38, 76.19, 73.52, 73.38, 72.28, 67.50, 49.28, 10.81; MS (EMM) $^+$ :  $m/z$ : 591.0406 ([M+Na] $^+$ , calcd. 591.0400)

**2,3,6-tri-*O*-benzyl- $\beta$ -L-methyl altrofuranose:** Dibutyltin oxide (244 mg, .979 mmol) was placed in a flame-dried round bottom flask flushed with  $\text{N}_2$ . A solution of dibenzyl Altf $\mathbf{9}$  (282 mg, .753 mmol) in hot toluene (2.5 mL) was added and the flask was equipped with a claisen adapter, thermometer and reflux condenser. The ensemble was tilted 45° such that the bend in the claisen adapter could collect refluxing solvent. A spatula tip of  $\text{MgSO}_4$  was placed in the adapter and the reaction was heated to reflux. After 5 hours, the claisen adapter was removed and the condenser was fitted directly to the reaction flask. Benzyl bromide (116  $\mu\text{L}$ , .979 mmol) and tetrabutylammonium bromide (24 mg, .075 mmol) were added the reflux continued overnight. The contents were cooled to RT and quenched with aqueous KF. Toluene was isolated, washed with brine, dried over  $\text{MgSO}_4$ , filtered and concentrated *in vacuo*. Purification by silica gel chromatography (5%  $\rightarrow$  20% EtOAc in hexane) gave 237 mg of colorless oil (70%).  $^1\text{H}$  NMR (300 MHz,  $\text{CDCl}_3$ ,  $\delta$  (ppm)) 7.4 – 7.2 (m, 15H, Ar-H), 4.94 (s, 1H, H-1), 4.50 (m, 6H, 3x  $\text{OCH}_2\text{Ph}$ ), 4.22 (t,  $J = 4.9$ , 1H, H-4), 4.15 (dd,  $J = 4.8$ , 1.1, 1H, H-3), 3.99 (m, 1H, H-5), 3.95 (d,  $J = 1.2$ , 1H, H-2), 3.55 (AB part of an ABX,  $J_{\text{AX}} = 3.9$ ,  $J_{\text{BX}} = 6.7$ ,  $J_{\text{AB}} = 9.9$ , 2H, H-6a, H-6b), 3.37 (s, 3H,  $\text{OCH}_3$ ), 2.50 (d,  $J = 3.5$ , 1H, 5-OH);  $^{13}\text{C}$  NMR (75 MHz,  $\text{CDCl}_3$ ,  $\delta$  (ppm)) 138.02, 137.55, 128.69, 128.64, 128.61, 128.30, 128.16, 128.10, 128.02, 127.96, 107.46, 87.32, 83.31, 82.65, 73.68, 72.22, 71.90, 71.13, 70.82, 55.07; MS (EMM) $^+$ :  $m/z$ : 487.2116 ([M+Na] $^+$ , calcd. 487.2092)

**2,3,6-tri-*O*-benzyl-5-deoxy-5-fluoro- $\beta$ -D-methyl galactofuranose:** 2,3,6-tri-*O*-benzyl- $\beta$ -L-methyl altrofuranose (26 mg, .056 mmol) was dissolved in dry DCM (500  $\mu$ L) under N<sub>2</sub> and chilled to -10 °C. DAST (11  $\mu$ L, .084 mmol) was added dropwise. After stirring for 30 minutes the reaction was warmed to RT and stirred for an additional hour. The contents were chilled to 0 °C and stirred with aqueous NaHCO<sub>3</sub> (2.0 mL) for 30 minutes. Extracted into chloroform, washed with water, dried over MgSO<sub>4</sub>, filtered and concentrated *in vacuo*. Purification by silica gel chromatography (5%  $\rightarrow$  10% EtOAc in hexane) gave 12 mg of a colorless oil (46%). <sup>1</sup>H NMR (300 MHz, CDCl<sub>3</sub>,  $\delta$  (ppm)) 7.4 – 7.2 (m, 15H, Ar-H) 4.93 (s, 1H, H-1), 4.75 (ddt, J = 48.4, 6.7, 3.7, 1H, H-5), 4.51 (m, 6H, 3x OCH<sub>2</sub>Ph), 4.12 (ddd, J = 22.6, 6.9, 3.5, 1H, H-4), 4.05 (m, 1H, H-3), 3.98 (m, 1H, H-2), 3.7 (m, 2H, H-6a, H-6b), 3.37 (s, 3H, OCH<sub>3</sub>); <sup>13</sup>C NMR (75 MHz, CDCl<sub>3</sub>,  $\delta$  (ppm)) 138.03, 137.74, 137.63, 128.67, 128.14, 127.96, 127.91, 107.51, 92.03, 89.65, 87.91, 82.78 (d, J = 6.5), 80.21 (d, J = 17.9), 73.74, 72.62, 72.25, 69.69, 69.37, 55.20, 29.92; <sup>19</sup>F NMR (280 MHz, CD<sub>3</sub>OD,  $\delta$  (ppm)) -204.9 (dq, J = 44.9, 23.7); MS (EMM)<sup>+</sup>: *m/z*: 489.2036 ([M+Na]<sup>+</sup>, calcd. 489.2048)

**5-deoxy-5-fluoro-beta-D-methyl galactofuranose (11):** 2,3,6-tri-*O*-benzyl-5-deoxy-5-fluoro- $\beta$ -D-methyl galactofuranose (51 mg, .109 mmol) was dissolved in reagent grade methanol (4.5 mL, .025M) and treated with 10 wt% palladium hydroxide on carbon (25mg). The flask was evacuated and backfilled with H<sub>2</sub> from a balloon three times. Stirred at STP overnight. Filtered through celite, washed with methanol and concentrated in vacuo. Isolated 22 mg of a colorless oil (100%). <sup>1</sup>H NMR (300 MHz, CD<sub>3</sub>OD,  $\delta$  (ppm)) 4.71 (d, J = 1.6, 1H, H-1), 4.58 (ddt, J = 48.4, 6.9, 3.8, 1H, H-5), 4.0 – 3.6 (m, 5H, H-2, H-3, H-4, H-6a, H-6b), 3.33 (s, 3H, OCH<sub>3</sub>); <sup>19</sup>F NMR (280 MHz, CD<sub>3</sub>OD,  $\delta$  (ppm)) -209.3 (dq, J = 48.6, 20.1); <sup>13</sup>C NMR (75 MHz, CD<sub>3</sub>OD,  $\delta$  (ppm)) 109.25, 93.37, 91.01, 82.35, 81.30, 81.05, 76.92, 76.85, 61.49, 61.17, 54.22; MS (EMM)<sup>+</sup>: *m/z*: 219.0638 ([M+Na]<sup>+</sup>, calcd. 219.0640)

**2,3,6-tri-*O*-benzoyl-5-deoxy-5-fluoro- $\beta$ -D-methyl galactofuranose:** Fluoro Galf 11 (20mg, .099 mmol) was dissolved in dry pyridine (1.0 mL) under N<sub>2</sub> atmosphere and chilled to 0 °C. Two crystals of dimethylamino pyridine were added. Benzoyl chloride (60  $\mu$ L) was added dropwise over 5 minutes. The contents were warmed to RT and stirred for 1 hour. The reaction was diluted with toluene and azeotroped 3x. Placed on high vacuum line to dry. Purified by silica chromatography (5%  $\rightarrow$  10% EtOAc in hexane). Isolated 35 mg of colorless oil (70%). <sup>1</sup>H NMR (300 MHz, CDCl<sub>3</sub>,  $\delta$  (ppm)) 8.08 (m, 6H, Ar-H), 7.58 (m, 3H, Ar-H), 7.45 (m, 6H, Ar-H), 5.63 (d, J = 4.5, 1H, H-3), 5.54 (s, 1H, H-2), 5.38 (m, 1H, H-5), 5.20 (s, 1H, H-1), 4.70 (m, 2H, H-6a, H-6b), 4.43 (ddd, J = 27.0, 4.7, 2.1), 3.48 (s, 3H, OCH<sub>3</sub>); <sup>19</sup>F NMR (280 MHz, CDCl<sub>3</sub>,  $\delta$  (ppm)) -208.0 (dq, J = 48.6, 27.0); <sup>13</sup>C NMR (75 MHz, CDCl<sub>3</sub>,  $\delta$  (ppm)) 166.42, 166.22, 165.70, 139.90, 133.83, 133.77, 133.48, 130.40, 130.19, 130.01, 129.79, 129.31, 129.17, 128.73, 128.64, 107.40, 90.59, 88.17, 82.65, 82.41, 81.34, 77.89, 77.81, 64.30, 63.98, 55.35; MS (EMM)<sup>+</sup>: *m/z*: 531.1399 ([M+Na]<sup>+</sup>, calcd. 531.1426)

**1-*O*-acetyl-2,3,6-tri-*O*-benzoyl-5-deoxy-5-fluoro-D-galactofuranose:** 2,3,6-tri-*O*-benzoyl-5-deoxy-5-fluoro- $\beta$ -D-methyl galactofuranose (84 mg, .165 mmol) was placed in a flame-dried round bottom flask and treated with a 1.4% v/v solution of concentrated H<sub>2</sub>SO<sub>4</sub> in acetic anhydride (2.0 mL). The reaction stirred at RT for 1.5 hours. Quenched with 2.0 mL of saturated NaHCO<sub>3</sub> solution, diluted with brine and extracted into DCM 3x. Dried organic layer over MgSO<sub>4</sub>, filtered and concentrated *in vacuo*. Azeotroped remaining acetic acid with toluene 2x.

Purified by silica gel chromatography (5% → 20% EtOAc in hexane) to give 81 mg of white crystalline solid (91%). <sup>1</sup>H NMR (300 MHz, CDCl<sub>3</sub>, δ (ppm)) 8.08 (m, 6H, Ar-H), 7.58 (m, 3H, Ar-H), 7.45 (m, 6H, Ar-H), 6.60 (d, J = 4.5, .2H, H-1α), 6.52 (s, 1H, H-1β), 6.14 (t, J = 6.9, .2H, H-3α), 5.77 (dd, J = 7.4, 4.6, .2H, H-2α), 5.69 (m, 2H, H-2β, H-3β), 5.36 (m, 1H, H-5β), 5.20 (m, .2H, H-5α), 4.65 (m, 3.4H, H-6αα, H-6-aβ, H-6bα, H-6bβ, H-4β), 4.43 (ddd, J = 26.2, 6.4, 2.8, 1H, H-4α), 2.20 (s, 3H, C(O)CH<sub>3</sub> β), 2.09 (s, .6H, C(O)CH<sub>3</sub> α); <sup>19</sup>F NMR (280 MHz, CDCl<sub>3</sub>, δ (ppm)) -206.1 (dq, J = 51.6, 21.2, α) -207.8 (dq, J = 48.7, 24.5, β); <sup>13</sup>C NMR (75 MHz, CDCl<sub>3</sub>, δ (ppm)) 169.69, 169.20, 166.34, 166.28, 166.15, 165.99, 165.44, 134.05, 133.96, 133.49, 130.26, 130.16, 130.09, 130.01, 129.81, 129.74, 129.04, 128.96, 128.86, 128.80, 128.64, 99.80, 93.14, 90.49, 90.40, 88.07, 87.96, 85.02, 84.77, 80.73, 80.46, 77.71, 77.63, 75.70, 74.29, 74.22, 64.16, 63.83, 63.58, 21.27, 21.17; MS (EMM)<sup>+</sup>: m/z: 559.1364 ([M+Na]<sup>+</sup>, calcd. 559.1375)

**Dibenzyl 2,3,6-tri-O-benzoyl-5-deoxy-5-fluoro-α-D-galactofuranose monophosphate:** 1-O-acetyl-2,3,6-tri-O-benzoyl-5-deoxy-5-fluoro-D-galactofuranose (22 mg, .041 mmol) was placed in a flame dried round bottom flask and dissolved in dry DCM (450 μL) under N<sub>2</sub> atmosphere. The solution was chilled to 0 °C and treated with a 33 wt% HBr in AcOH solution (28 μL). After stirring for 20 minutes the reaction was warmed to RT and stirred for 4 hours. Azeotroped using freshly distilled toluene 3x to isolate the crude glycosyl bromide as an orange oil. The oil was dissolved in dry toluene (450 μL) under N<sub>2</sub>. The solution was added dropwise over 30 minutes to a stirring solution of dibenzyl phosphate (49 mg, .176 mmol) in dry toluene (500 μL). The contents stirred at RT for 2.5 hours. Concentration *in vacuo* followed by silica gel chromatography (12% EtOAc in toluene) allowed isolation of 28 mg of the α-anomer as a slightly cloudy viscous oil (90%). <sup>1</sup>H NMR (300 MHz, CDCl<sub>3</sub>, δ (ppm)) 8.00 (m, 6H, Ar-H), 7.55 (m, 3H, Ar-H), 7.4 – 7.2 (m, 16H, Ar-H), 6.31 (t, J = 4.7, 1H, H-1), 6.14 (t, J = 6.9, 1H, H-3), 5.70 (ddd, J = 7.1, 4.3, 2.2, 1H, H-2), 5.17 (dtd, J = 47.1, 6.4, 3.2, 1H, H-5), 5.07 (AB part of an ABX, J = 6.5, 3.5, 2H, POCH<sub>2</sub>Ph), 4.90 (AB part of an ABX, J = 11.6, 6.9, 2H, POCH<sub>2</sub>Ph), 4.61 (m, 2H, H-6a, H-6b), 4.50 (ddd, J = 24.4, 6.4, 3.5, 1H, H-4); <sup>19</sup>F NMR (280 MHz, CDCl<sub>3</sub>, δ (ppm)) -203.8 (dq, J = 56.9, 28.9); <sup>31</sup>P NMR (122 MHz, CDCl<sub>3</sub>, δ (ppm)) -2.4 (m); <sup>13</sup>C NMR (75 MHz, CDCl<sub>3</sub>, δ (ppm)) 166.13, 165.96, 165.76, 134.00, 133.89, 133.46, 130.26, 130.15, 129.96, 129.60, 128.76, 128.70, 128.63, 128.58, 128.05, 127.85, 101.02, 97.61, 97.54, 90.59, 88.15, 80.86, 80.60, 76.54, 76.44, 73.56, 73.47, 69.56, 69.47, 63.32; MS (EMM)<sup>+</sup>: m/z: 777.1898 ([M+Na]<sup>+</sup>, calcd. 777.1872)

**Triethylammonium 2,3,6-tri-O-benzoyl-5-deoxy-5-fluoro-α-D-galactofuranose monophosphate:** Dibenzyl 2,3,6-tri-O-benzoyl-5-deoxy-5-fluoro-D-galactofuranose monophosphate (29 mg, .038 mmol) was dissolved in ethyl acetate (1.0 mL, .05M) and triethylamine (38 μL). 10% Pd on carbon (15 mg) was added. The stoppered flask was evacuated and back filled with H<sub>2</sub> from a balloon. The contents stirred at STP overnight. The reaction was filtered through celite, washed with ethyl acetate and concentrated *in vacuo*. Isolated 14 mg of cloudy, viscous oil (54%). <sup>1</sup>H NMR (300 MHz, CDCl<sub>3</sub>, δ (ppm)) 8.1 (d, J = 7.5, 2H, Ar-H), 7.9 (m, 3H, Ar-H), 7.5 – 7.2 (m, 9H, Ar-H), 6.2 (m, 2H, H-1, H-3), 5.62 (m, 1H, H-2), 5.30 (m, 1H, H-5), 4.7 (m, 2H, H-6a, H-6b), 4.5 (dt, J = 19.3, 6.2, 1H, H-4), 3.00 (q, J = 7.3, 3.8H, NCH<sub>2</sub>CH<sub>3</sub>), 1.2 (t, J = 7.5, 10.7H, NCH<sub>2</sub>CH<sub>3</sub>); <sup>19</sup>F NMR (280 MHz, CDCl<sub>3</sub>, δ (ppm)) -199.7 (dq, J = 47.1, 25.1); <sup>31</sup>P NMR (122 MHz, CDCl<sub>3</sub>, δ (ppm)) 0.0 (d, J = 3.5); <sup>13</sup>C NMR (75 MHz, CDCl<sub>3</sub>, δ (ppm)) 164.83, 164.74, 164.58, 132.26, 132.06, 131.90, 129.14, 128.93, 128.81,



128.58, 128.47, 128.44, 127.92, 127.25, 127.1795.17, 95.11, 91.02, 78.54, 78.24, 75.80, 75.70, 73.09, 72.98, 62.71, 62.43, 44.38, 7.37; MS (EMM)<sup>-</sup>: *m/z*: 573.0966 ([M]<sup>-</sup>, calcd. 573.0967)

**Tributylammonium 5-deoxy-5-fluoro- $\alpha$ -D-galactofuranose monophosphate:**

Triethylammonium 2,3,6-tri-*O*-benzoyl-5-deoxy-5-fluoro- $\alpha$ -D-galactofuranose monophosphate (14 mg, .021 mmol) was dissolved in a 5:2:1 mixture of methanol:water:triethylamine (1.0 mL) and warmed to 30 °C. The reaction stirred for 4 days. Concentrated *in vacuo* then azeotroped 3x with toluene. Purified by anion exchange chromatography (Biorad AG1-X8 resin, gradient elution 250 mM  $\rightarrow$  500 mM NH<sub>4</sub>HCO<sub>3</sub> solution) using a peristaltic pump. Column fractions were combined, frozen on dry ice and lyophilized. The residue was treated with ~200  $\mu$ L Dowex-50WX8-200 resin (pH 7, pretreated with 2.0M HNBu<sub>3</sub>Cl) for 4 hours. The resin was removed by filtration through a cotton plug and the filtrate was frozen on dry ice and lyophilized. Isolated 10 mg of fluffy white solid (82%, 1.5eq. of HNBu<sub>3</sub>); <sup>1</sup>H NMR (300 MHz, D<sub>2</sub>O,  $\delta$  (ppm)) 5.51 (dd, J = 6.2, 4.2, 1H, H-1), 4.69 (dtd, J = ~50, 5.8, 3.9, 1H, H-5), 4.19 (t, J = 7.8, 1H, H-3), 4.15 (ddd, J = 8.0, 4.4, 2.0, 1H, H-2), 3.95 (dt, J = 19.5, 6.3, 1H, H-4), 3.84 (m, 2H, H-6a, H-6b), 3.10 (m, 9H, NBu), 1.62 (m, 9H, NBu), 1.33 (sextet, J = 7.3, 10H, NBu), 0.9 (t, J = 7.2, 13H); <sup>19</sup>F NMR (280 MHz, D<sub>2</sub>O,  $\delta$  (ppm)) -199.7 (dq, J = 46.4, 23.4); <sup>31</sup>P NMR (122 MHz, D<sub>2</sub>O,  $\delta$  (ppm)) -0.4 (broad s); <sup>13</sup>C NMR (75 MHz, D<sub>2</sub>O,  $\delta$  (ppm)) 96.91, 96.85, 95.41, 93.10, 79.82, 79.57, 76.74, 76.69, 73.59, 73.50, 60.71, 60.43, 52.85, 25.36, 19.44, 12.93; MS (EMM)<sup>-</sup>: *m/z*: 261.0182 ([M]<sup>-</sup>, calcd. 261.0181)

**5-deoxy-5-fluoro- $\alpha$ -D-galactofuranose uridine diphosphate (3):** A solution of tributylammonium UMP (5mg, .01 mmol) in anhydrous DMF (150  $\mu$ L) was stirred with activated 4 Å molecular sieves under N<sub>2</sub> for 1 hour. The molecular sieves were removed and the solution was treated with diisopropylethylamine (5  $\mu$ L, .03 mmol) and 1-methyl-3-benzenesulfonylimidazolium triflate (4 mg, 0.01 mmol) and stirred for 1 minute. The solution was added dropwise over 30 seconds to a solution of tributylammonium 5-deoxy-5-fluoro- $\alpha$ -D-galactofuranose monophosphate (3mg, .007 mmol) and MgCl<sub>2</sub> (1 3mg, .01 mmol) in anhydrous DMF (75  $\mu$ L) at 0 °C. The contents were raised to room temperature and stirred for 2 hours. The reaction was quenched with 1.0 mL of 100 mM ammonium acetate and washed 1x with 1.0 mL of DCM. The DCM was extracted with 1.0 mL of 100 mM ammonium acetate, the aqueous layers were combined, frozen on dry ice and stored at -20 °C until purification by HPLC. Purified by HPLC using a semiprep carbopak dionex column, 300mM triethylammonium acetate, pH = 6.0-7.0, flow rate = 1mL/min. Collected peak eluting at 40 – 45 minutes, froze on dry ice and lyophilized to give a light brown solid. <sup>1</sup>H NMR (500 MHz, D<sub>2</sub>O,  $\delta$  (ppm)) 7.83 (d, J = 8.0, 1H, H-5u), 5.86 (m, 2H, H-1r, H-6u) 5.55 (t, J = 4.8, 1H, H-1g) 4.56 (m, 1H, H-5g) 4.00 – 4.25 (m, 7H, H-2g, H-2r, H-3g, H-3r, H-4r, H-5ar, H-5br) 3.89 (dt, J = 18.9, 6.5, 1H, H-4g) 3.71- 3.80 (m, 2H, H-6ag, H-6bg); <sup>19</sup>F NMR (280 MHz, D<sub>2</sub>O,  $\delta$  (ppm)) -232.0; <sup>13</sup>C NMR (125 MHz, D<sub>2</sub>O,  $\delta$  (ppm)) 144.25, 105.25, 102.84, 100.32, 90.97, 85.90, 85.83, 79.02, 76.41, 75.63, 72.20, 67.42, 49.28, 10.81; MS (EMM)<sup>+</sup>: *m/z*: 591.0406 ([M+Na]<sup>+</sup>, calcd. 591.0400).

### III. Supplemental Figures

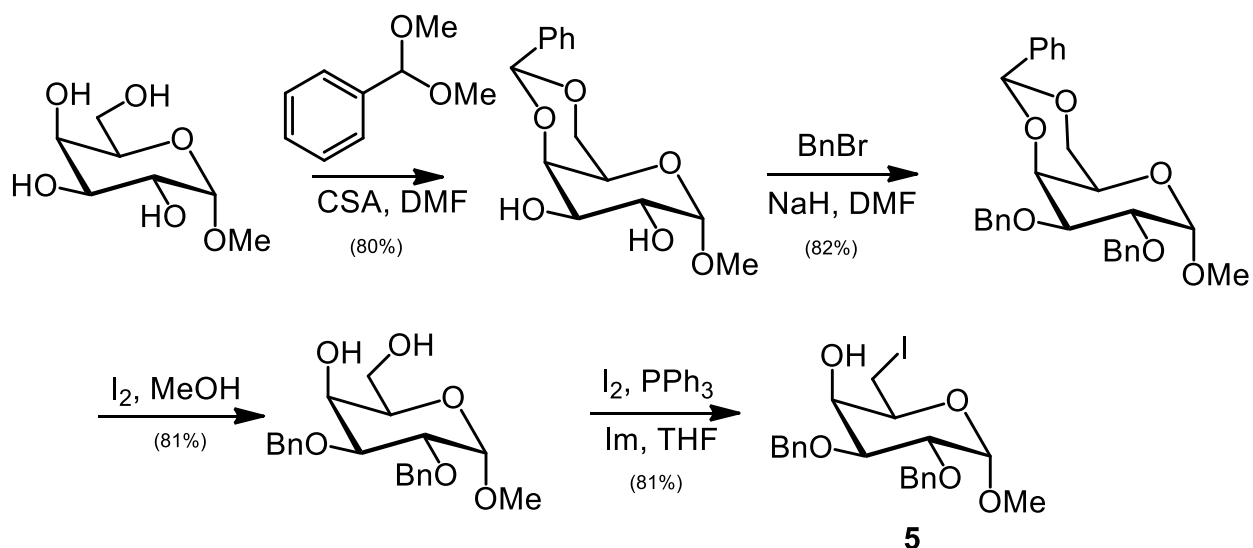

**Scheme S1:** Synthesis of idosugar **5** from methyl-D-galactopyranose.

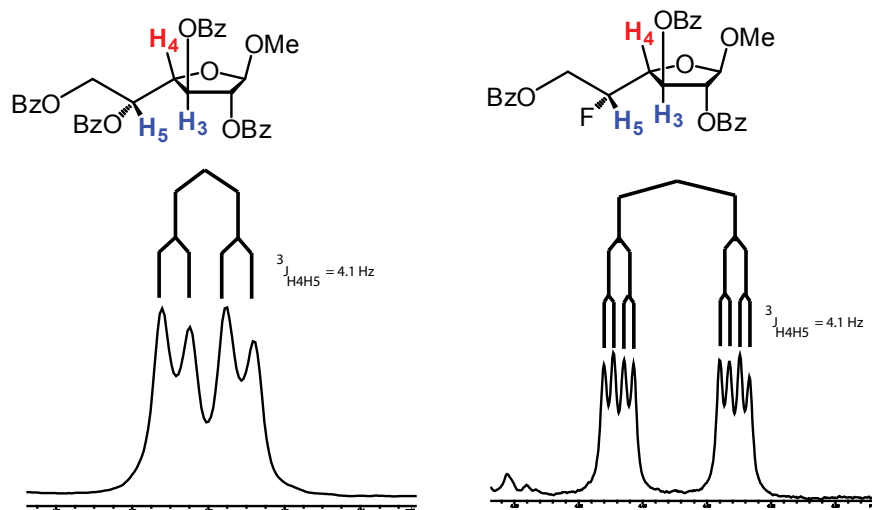

**Figure S2:**  $^1\text{H}$  NMR  $^3J_{\text{H}_4\text{H}_5}$  coupling constants of benzoylated 5-fluorofuranose and 2,3,6-tri-O-benzoyl- $\beta$ -Galp are identical. Thus, 5-fluorofuranose is assumed to have D-Galp stereochemistry.

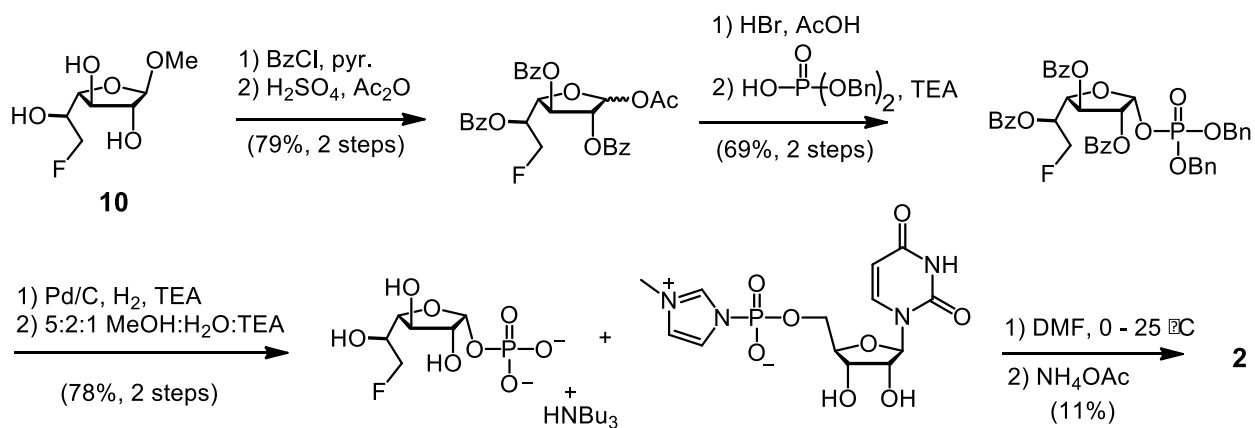

**Scheme S3:** Synthesis of **2** from 6F-Galf intermediate **10**.

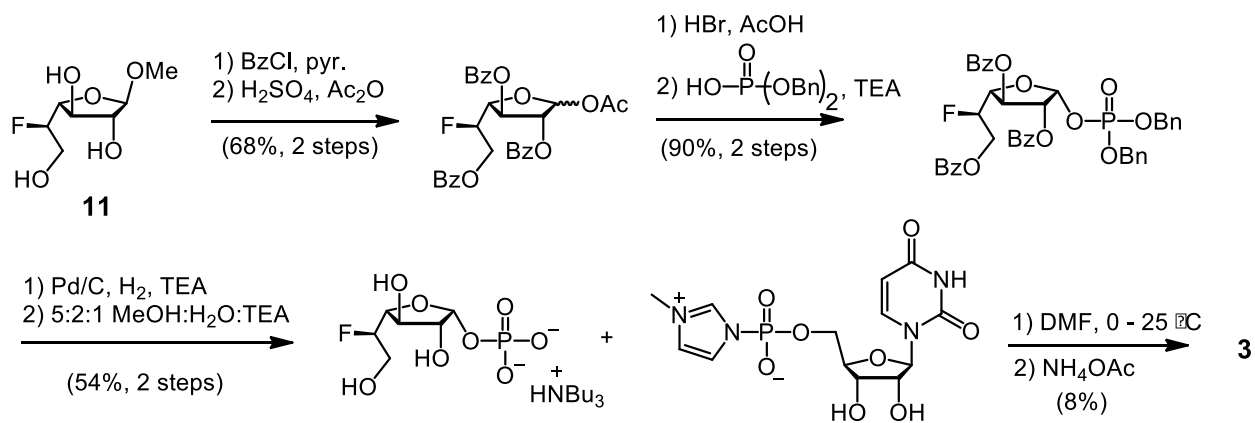

**Scheme S4:** Synthesis of **3** from 5F-Galf intermediate **11**.

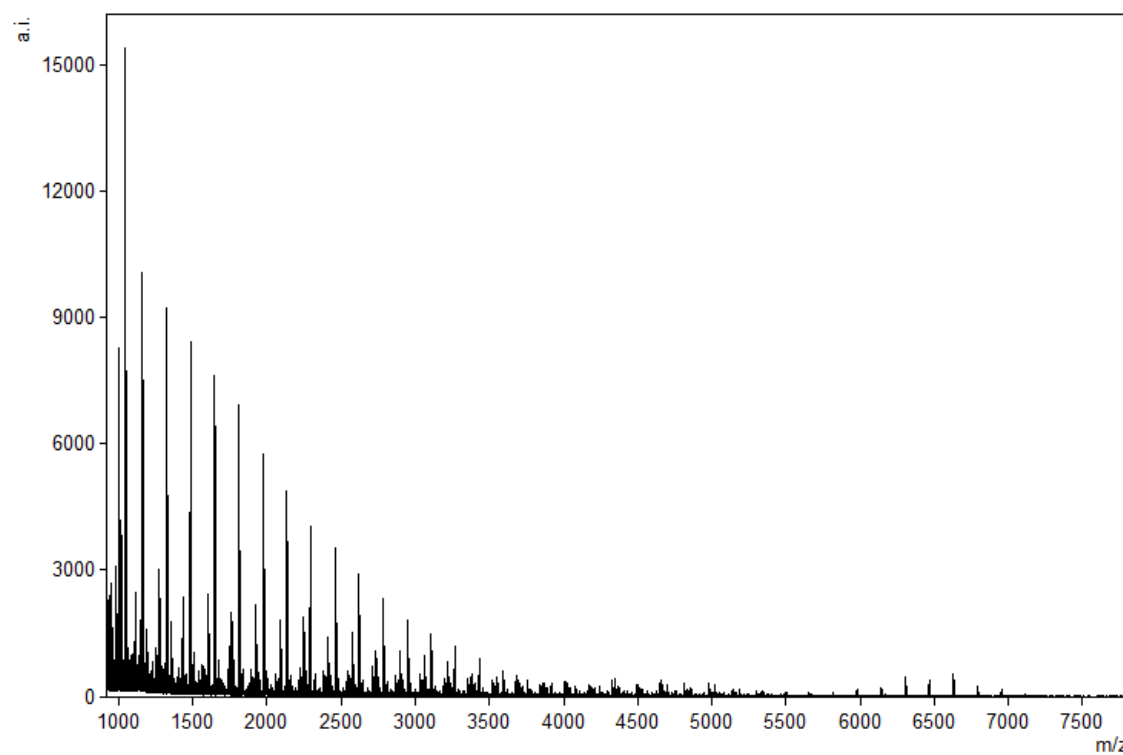

**Figure S5:** MALDI of products obtained by incubating G1T2 with hexasaccharide acceptor **12** and UDP-Galf.

A

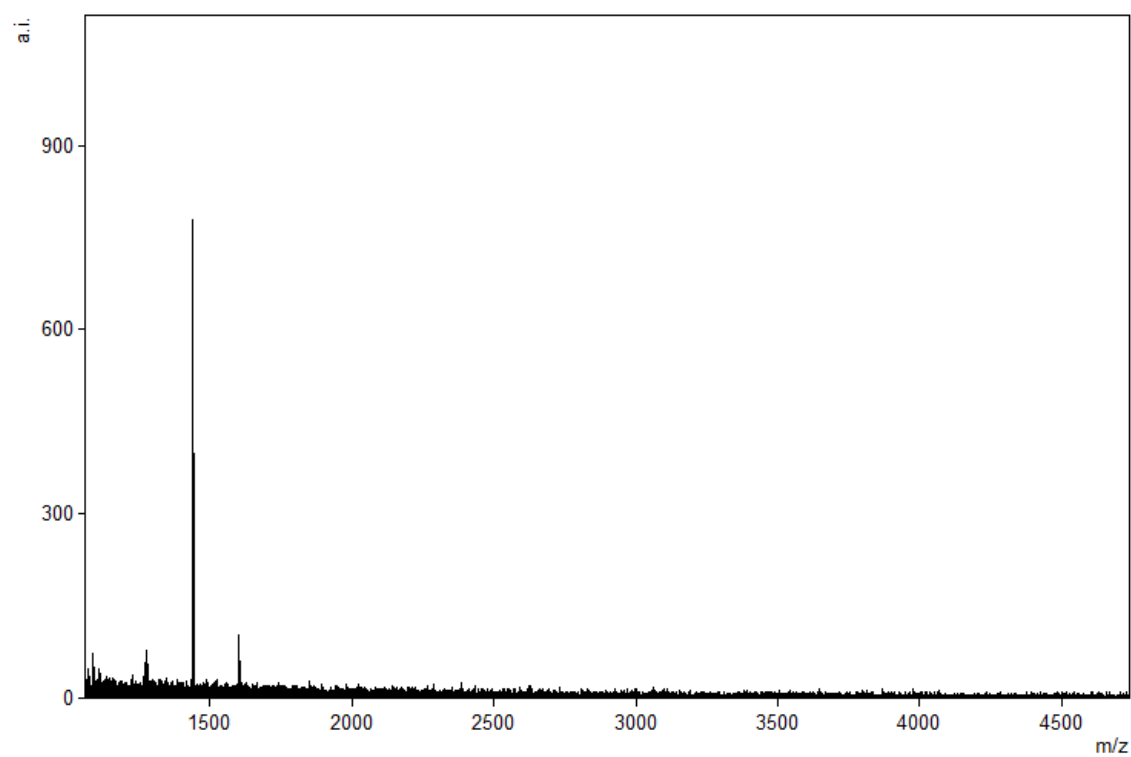

B

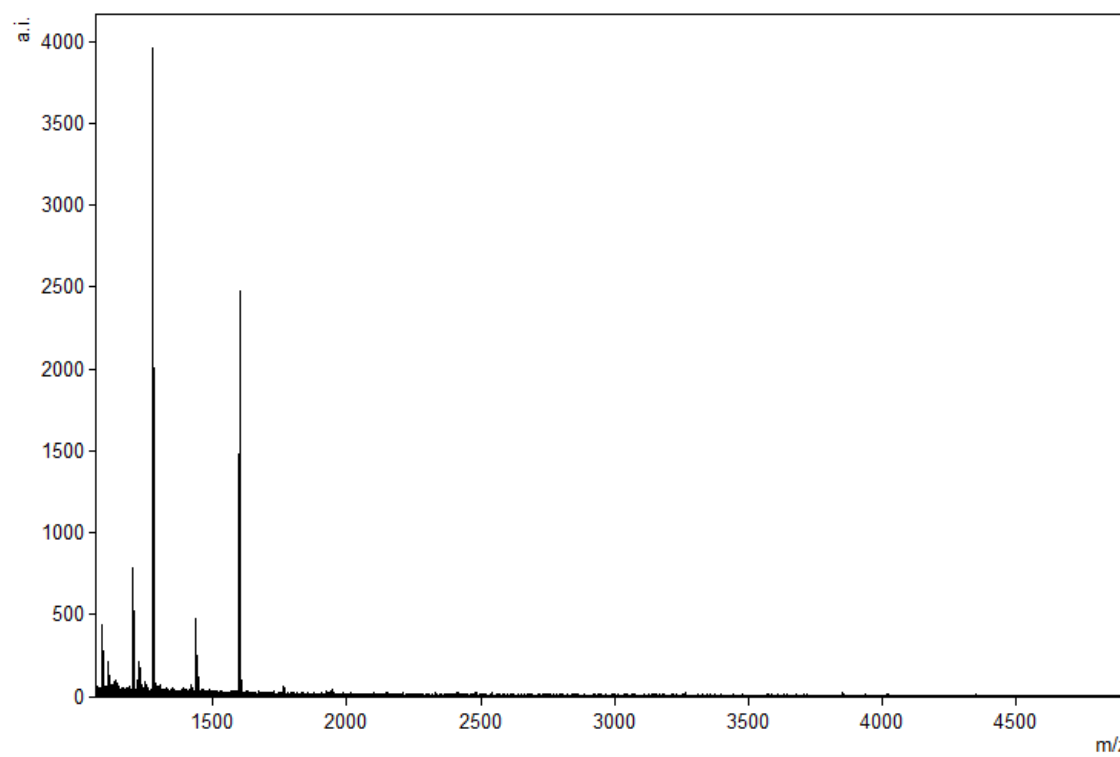

**Figure S6:** Full spectra for polymerization of hexasaccharide **12** with **2** (A) and **3** (B).

## IV. Spectral Data

2,3-di-O-benzyl-6-deoxy-6-iodo- $\beta$ -D-methylgalactopyranose (**5**):  $^1\text{H}$  NMR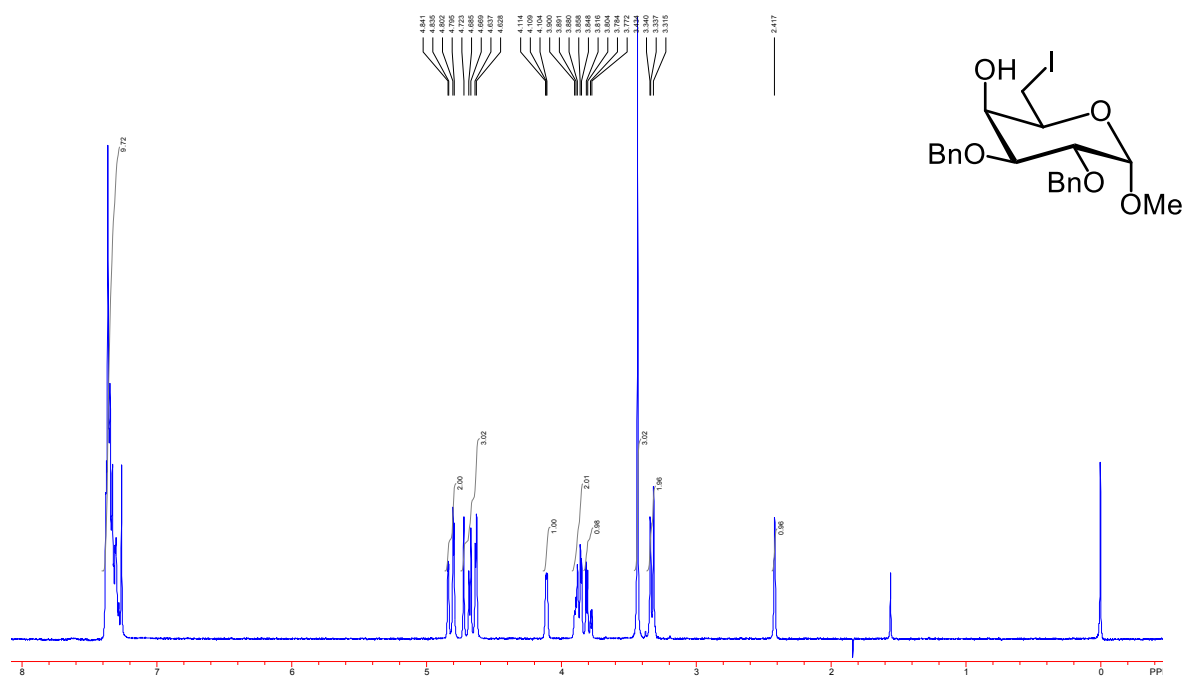2,3-di-O-benzyl-6-deoxy-6-iodo- $\beta$ -D-methylgalactopyranose (**5**):  $^{13}\text{C}$  NMR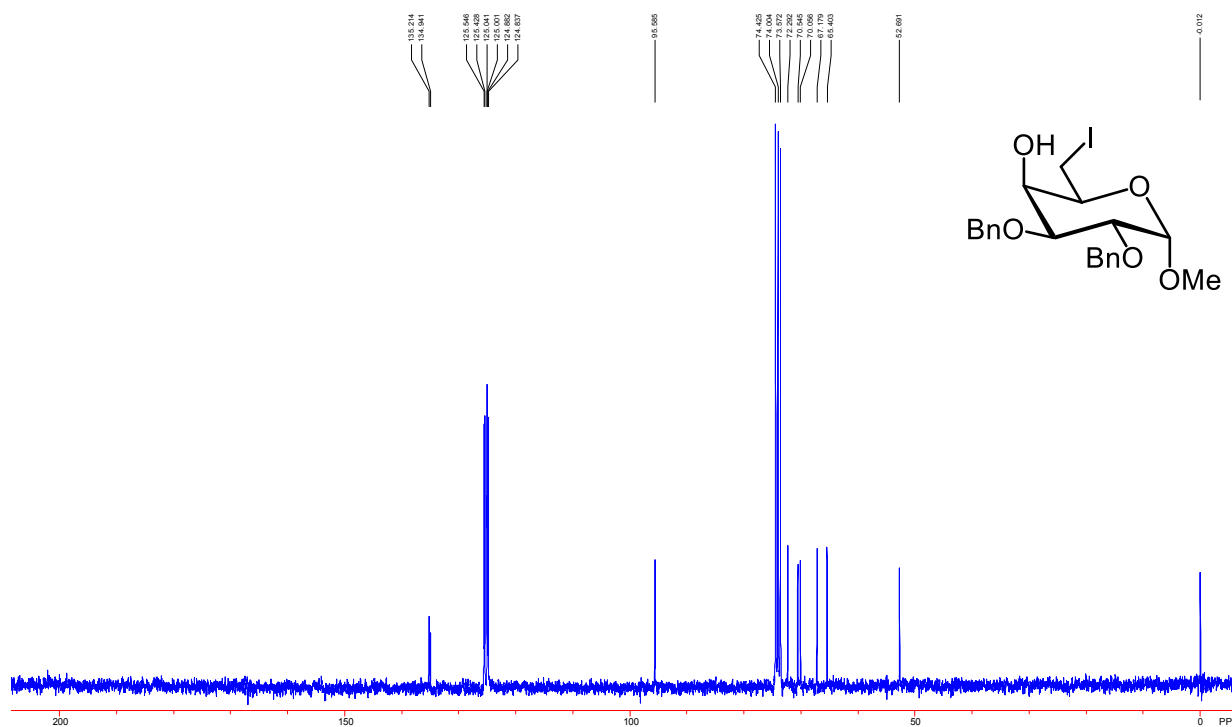

2,3-di-O-benzyl-5-eno- $\beta$ -D-methyl galactofuranose:  $^1\text{H}$  NMR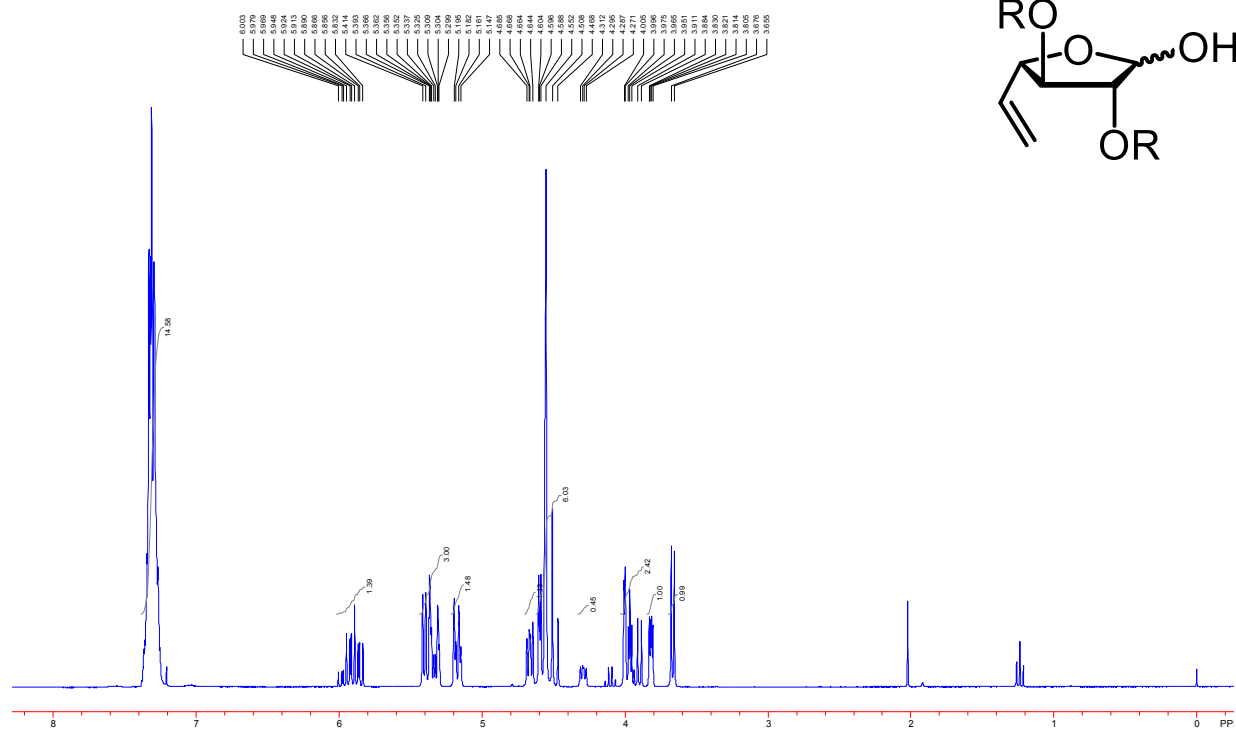2,3-di-O-benzyl-5-eno- $\beta$ -D-methyl galactofuranose:  $^{13}\text{C}$  NMR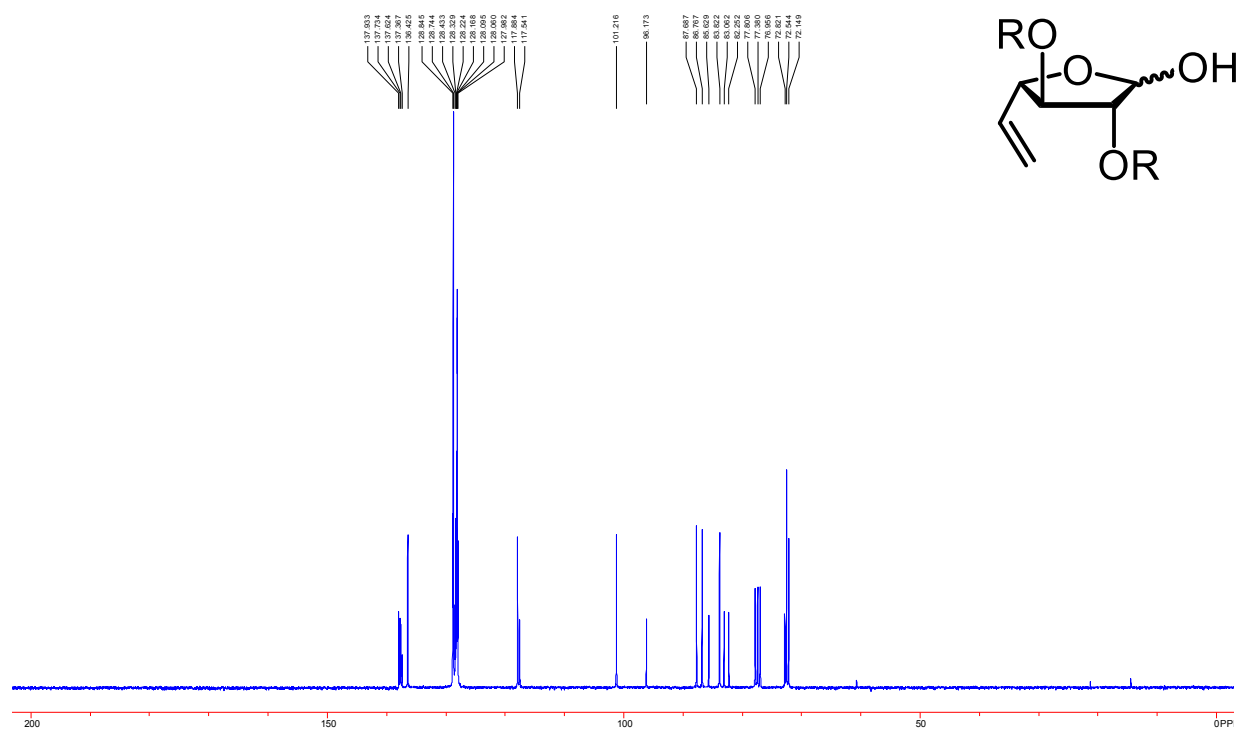

2,3-di-O-benzyl-5-eno- $\beta$ -D-methyl galactofuranose (**6**):  $^1\text{H}$  NMR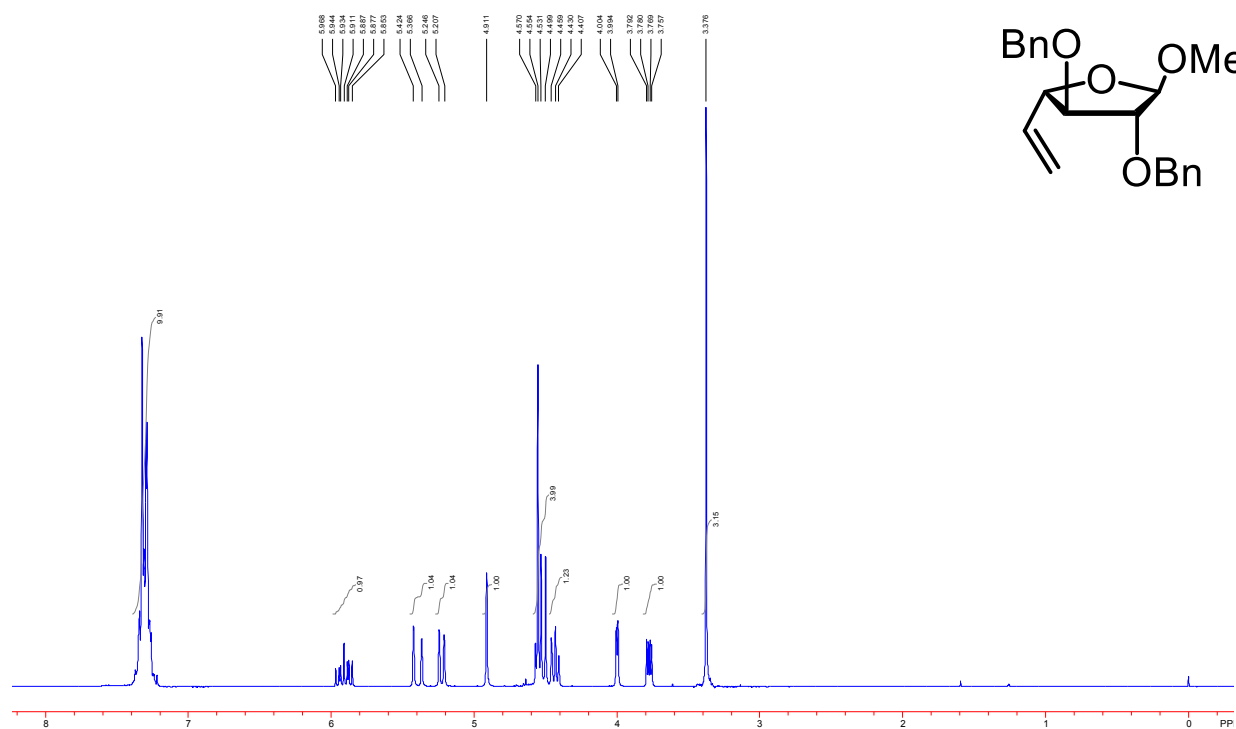2,3-di-O-benzyl-5-eno- $\beta$ -D-methyl galactofuranose (**6**):  $^{13}\text{C}$  NMR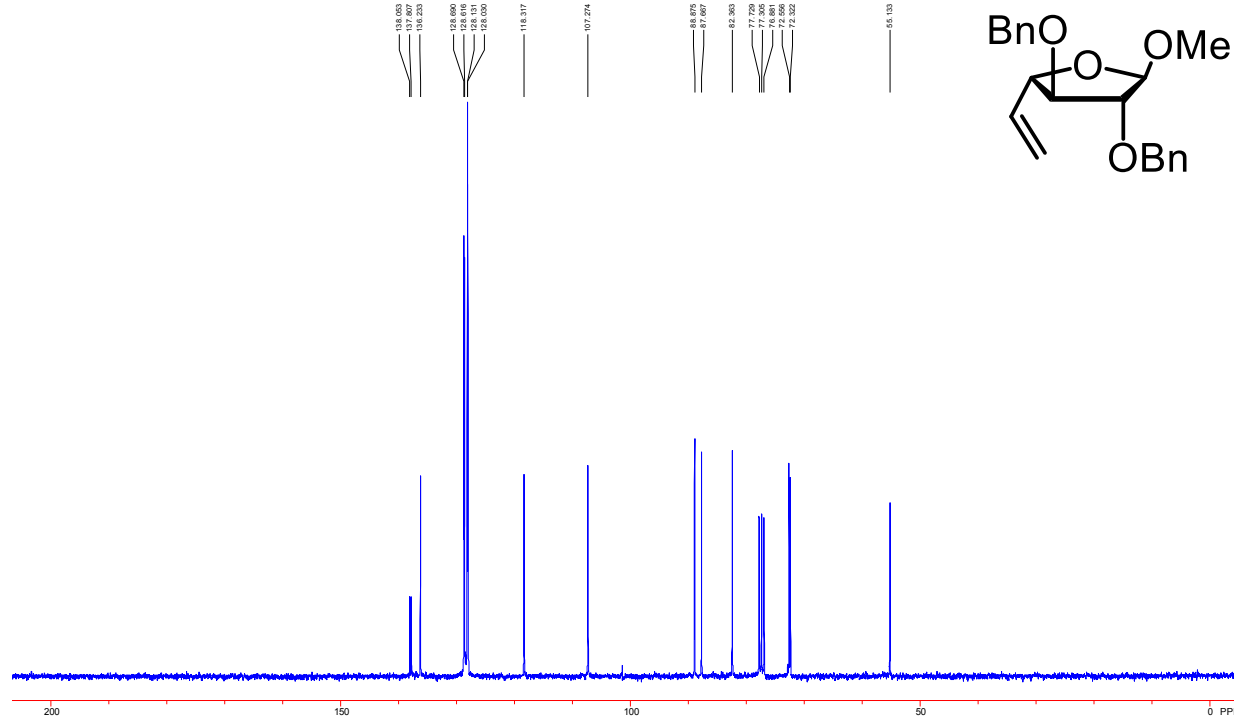



5,6-anhydro-2,3-di-O-benzyl- $\beta$ -D-methyl galactofuranose and 5,6-anhydro-2,3-di-O-benzyl- $\beta$ -L-methylaltrofuranose (**7**):  $^1\text{H}$  NMR

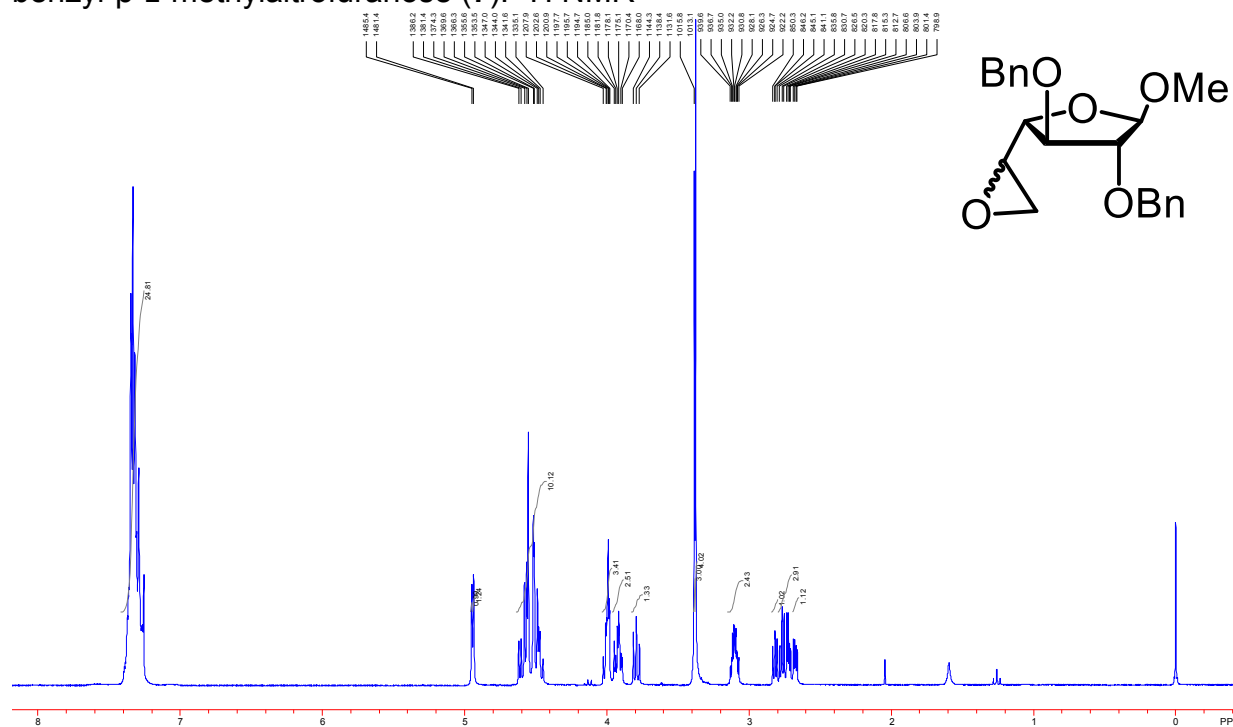

5,6-anhydro-2,3-di-O-benzyl- $\beta$ -D-methyl galactofuranose and 5,6-anhydro-2,3-di-O-benzyl- $\beta$ -L-methylaltrofuranose (**7**):  $^{13}\text{C}$  NMR

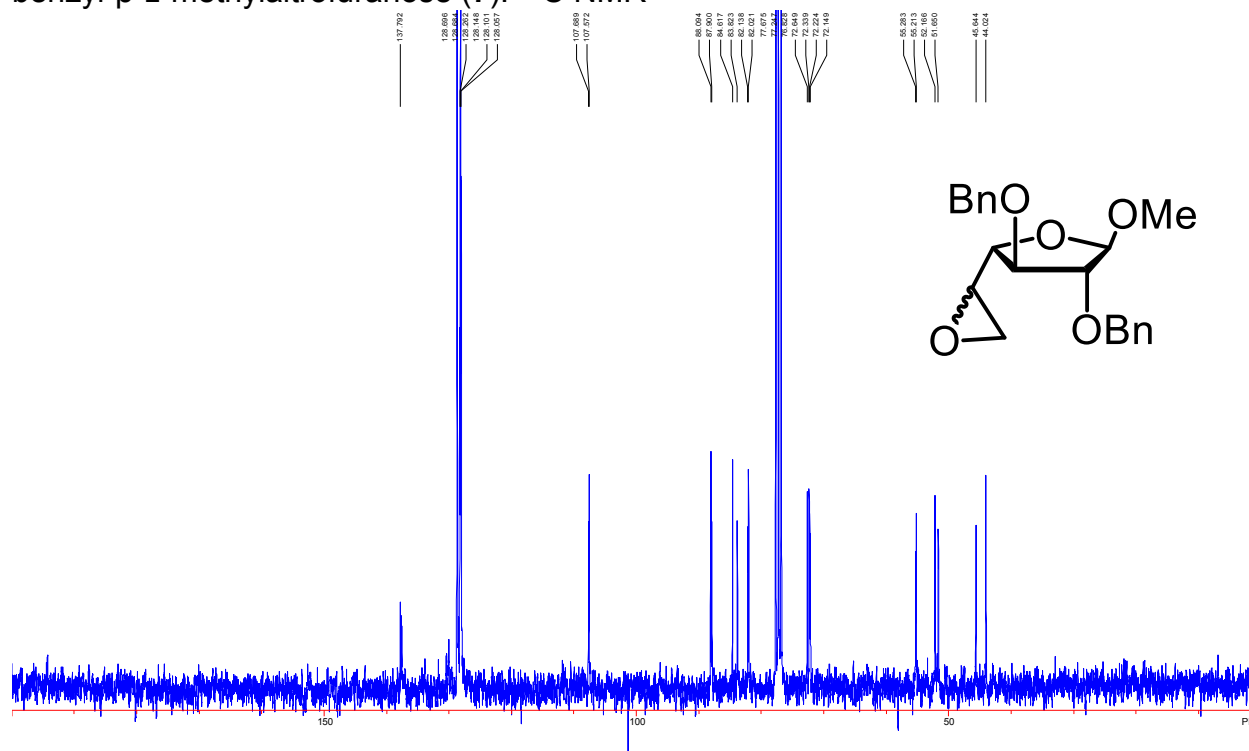

5,6-anhydro-2,3-di-O-benzyl-beta-D-methyl galactofuranose (**8**):  $^1\text{H}$  NMR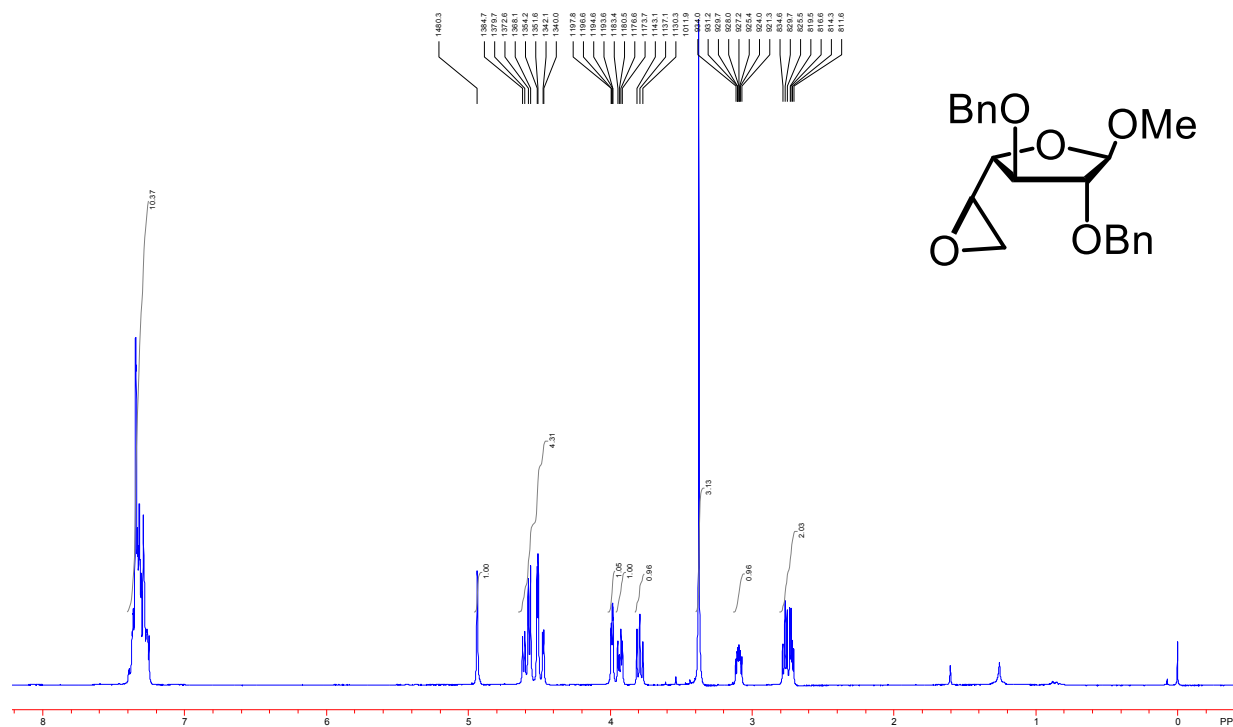5,6-anhydro-2,3-di-O-benzyl-beta-D-methyl galactofuranose (**8**):  $^{13}\text{C}$  NMR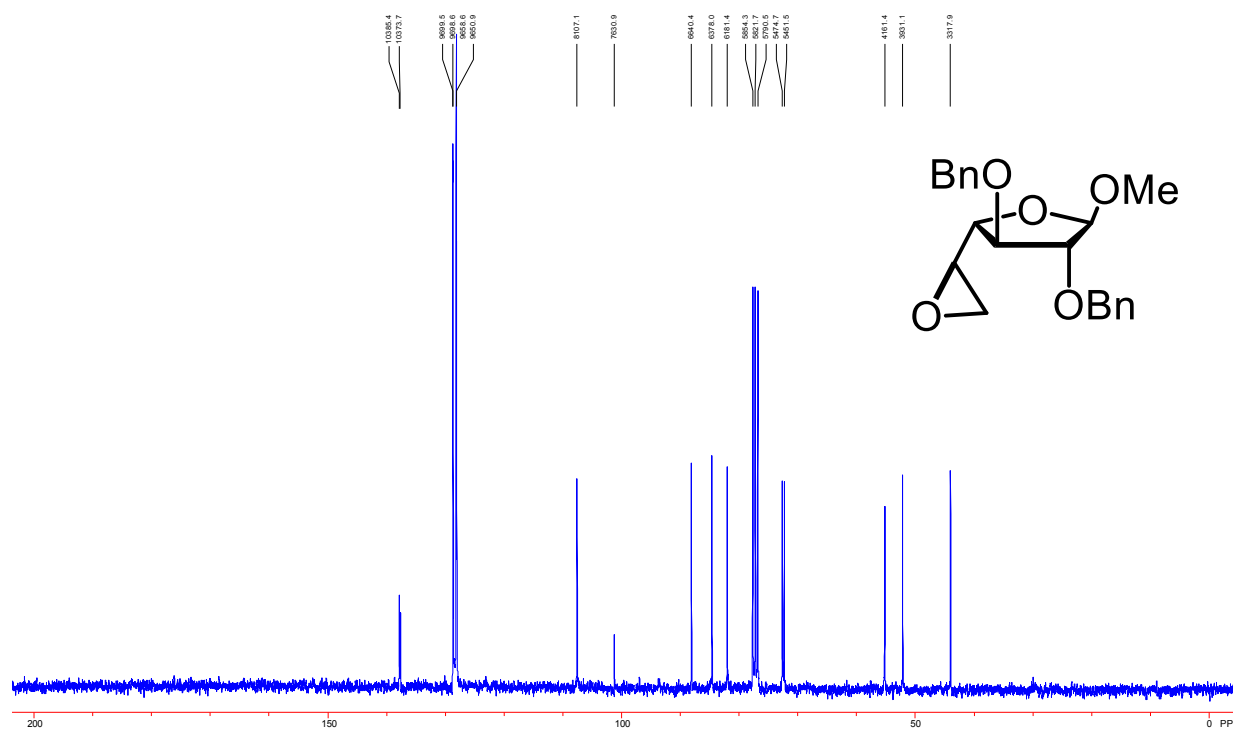

2,3-di-O-benzyl-6-deoxy-6-fluoro- $\beta$ -D-methyl galactofuranose:  $^1\text{H}$  NMR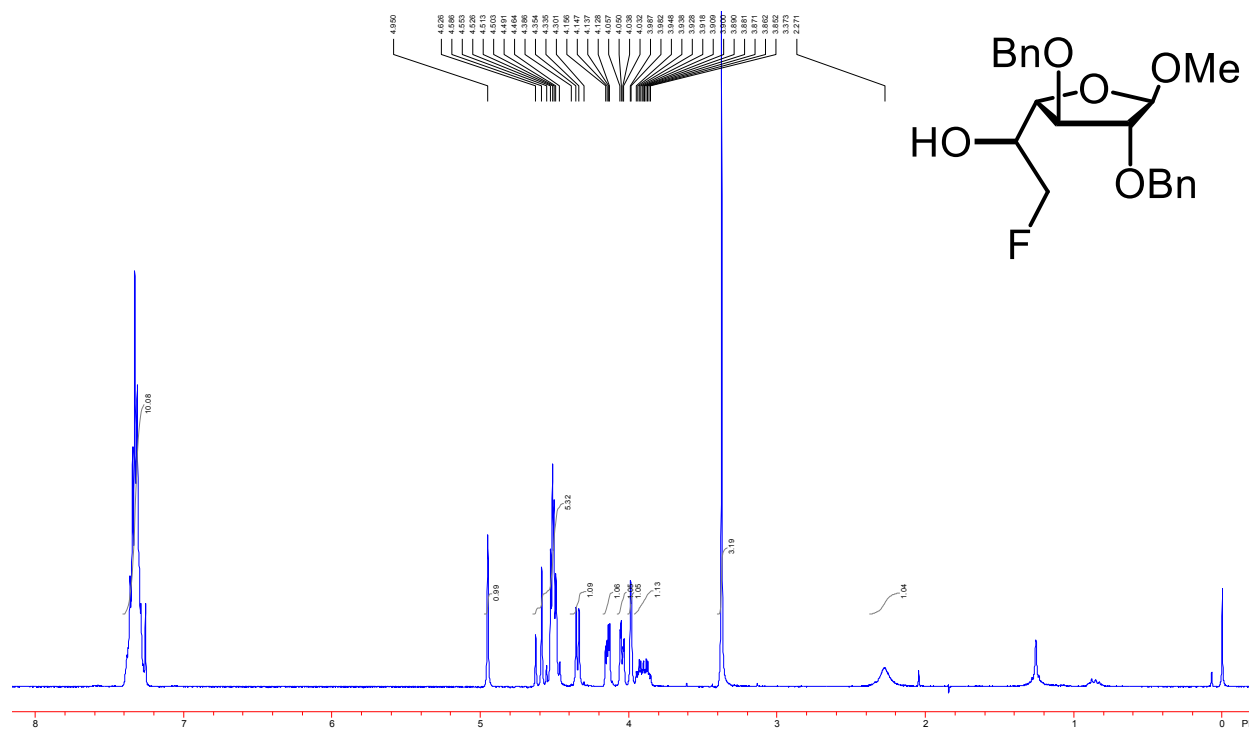2,3-di-O-benzyl-6-deoxy-6-fluoro- $\beta$ -D-methyl galactofuranose:  $^{19}\text{F}$  NMR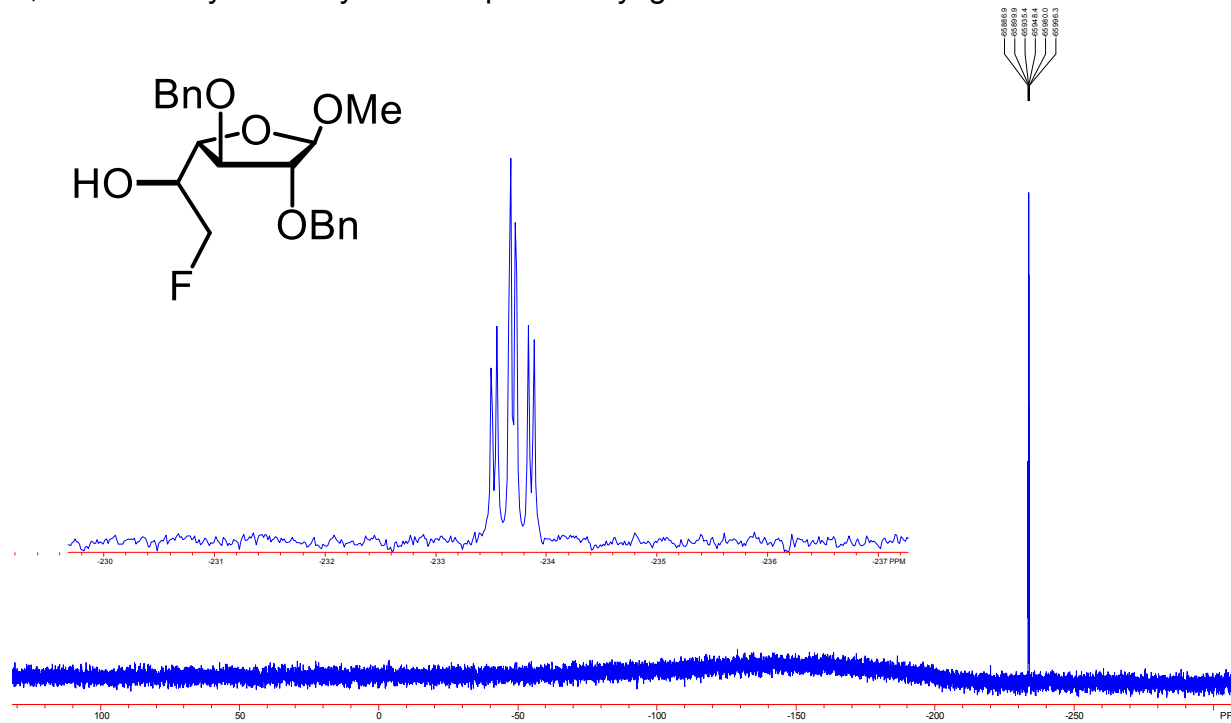

2,3-di-O-benzyl-6-deoxy-6-fluoro- $\beta$ -D-methyl galactofuranose:  $^{13}\text{C}$  NMR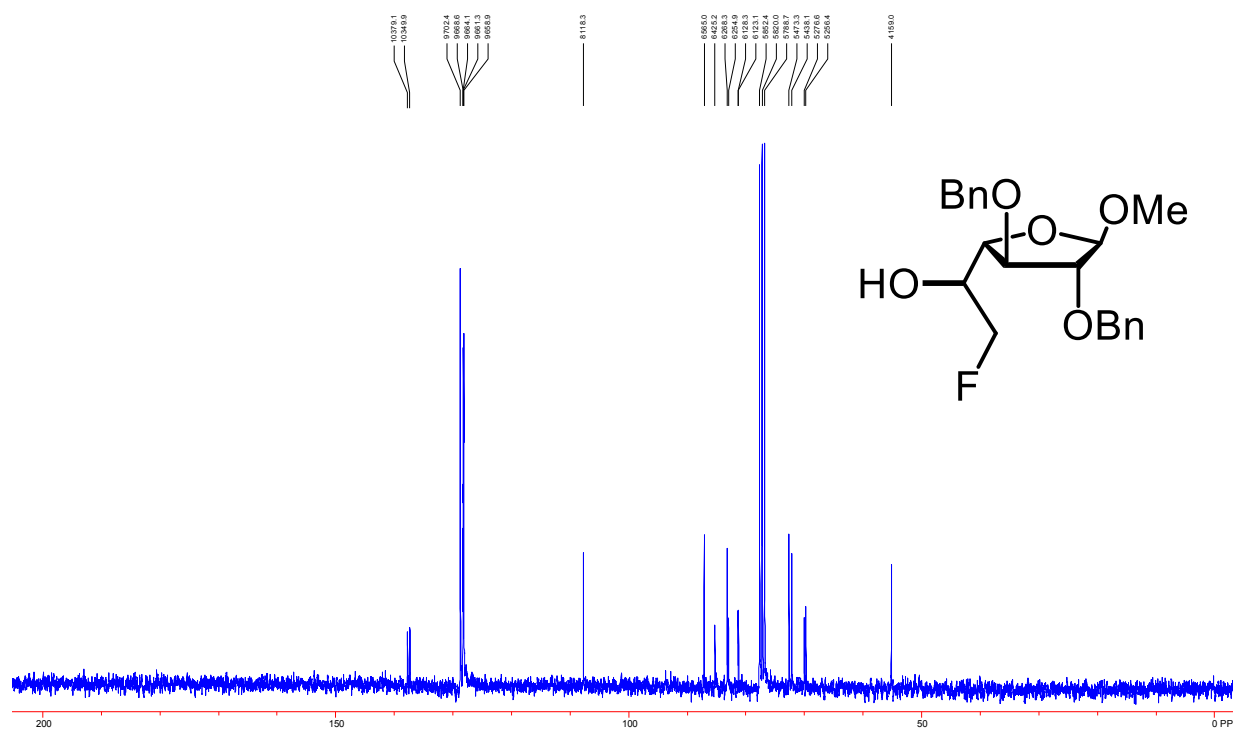6-deoxy-6-fluoro-beta-D-methyl galactofuranose (10):  $^1\text{H}$  NMR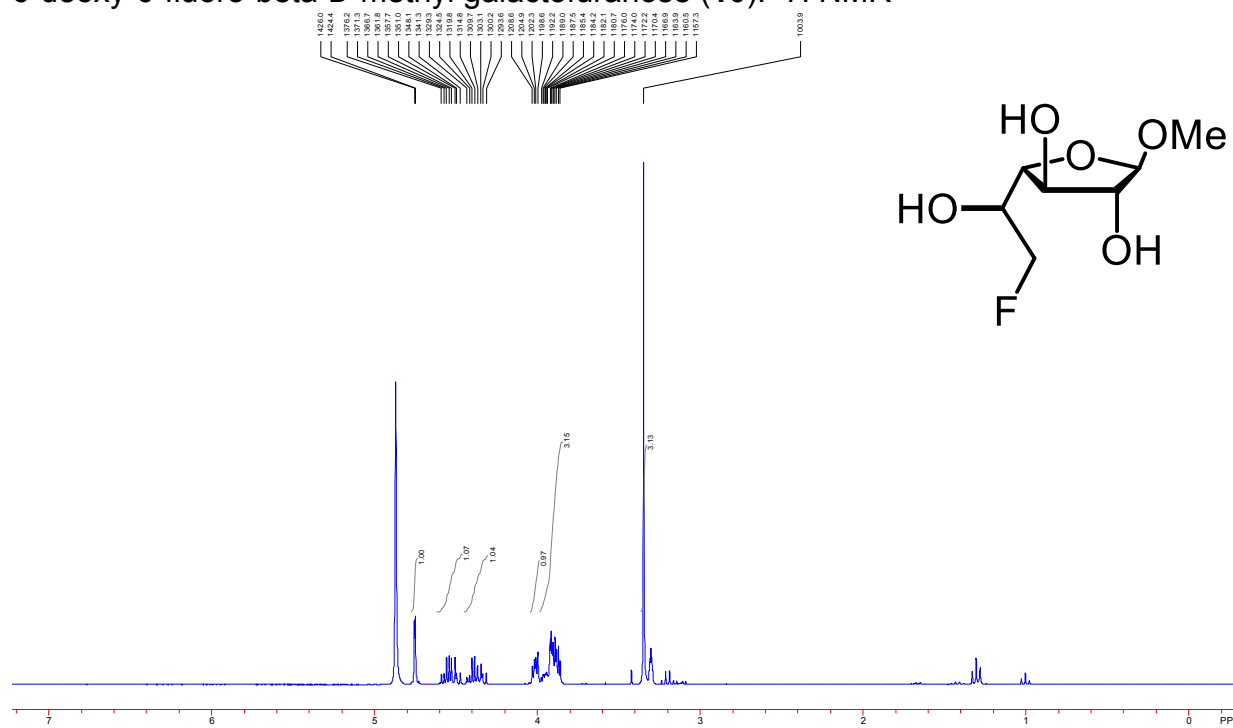

6-deoxy-6-fluoro-beta-D-methyl galactofuranose (**10**):  $^{19}\text{F}$  NMR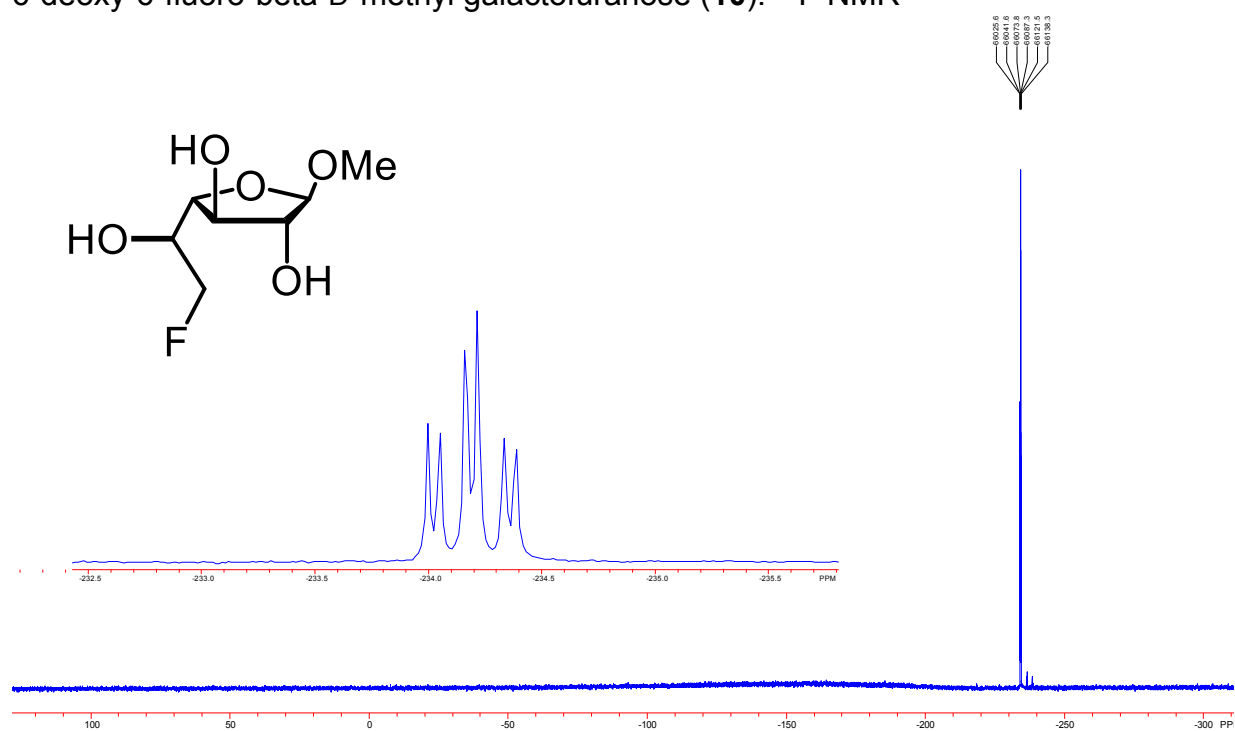6-deoxy-6-fluoro-beta-D-methyl galactofuranose (**10**):  $^{13}\text{C}$  NMR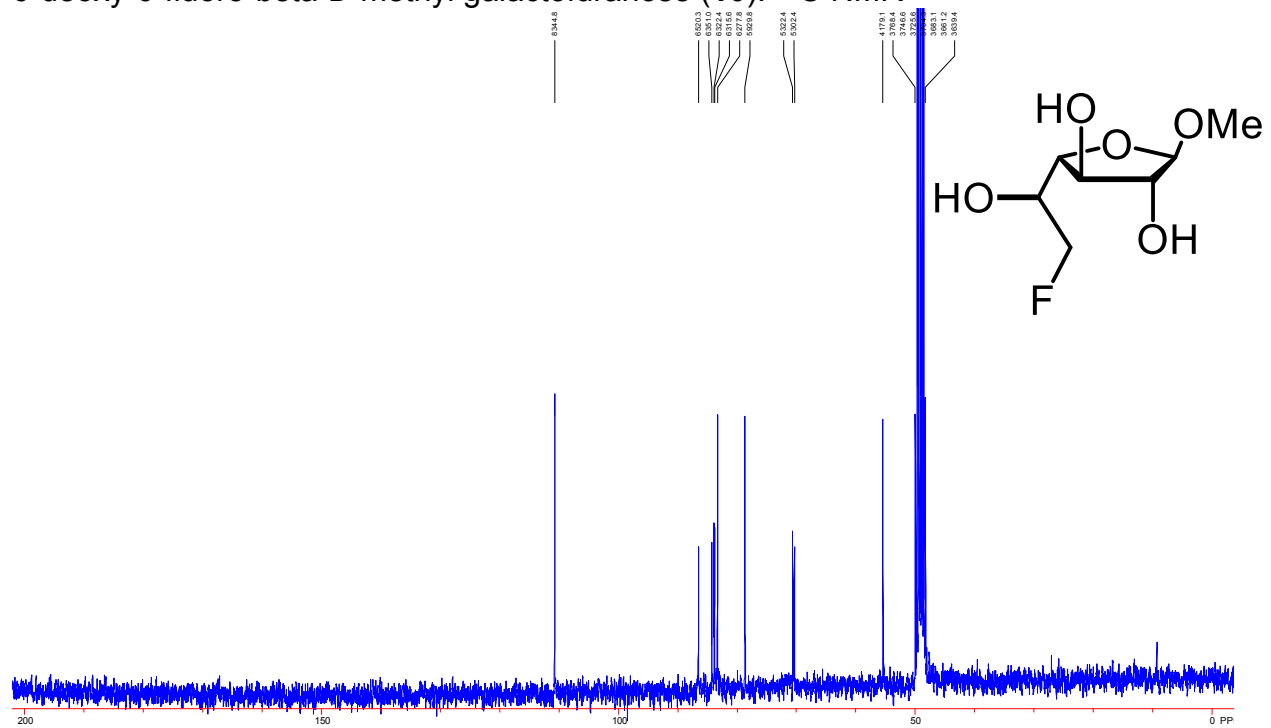



2,3,5-tri-O-benzoyl-6-deoxy-6-fluoro- $\beta$ -D-methyl galactofuranose:  $^{13}\text{C}$  NMR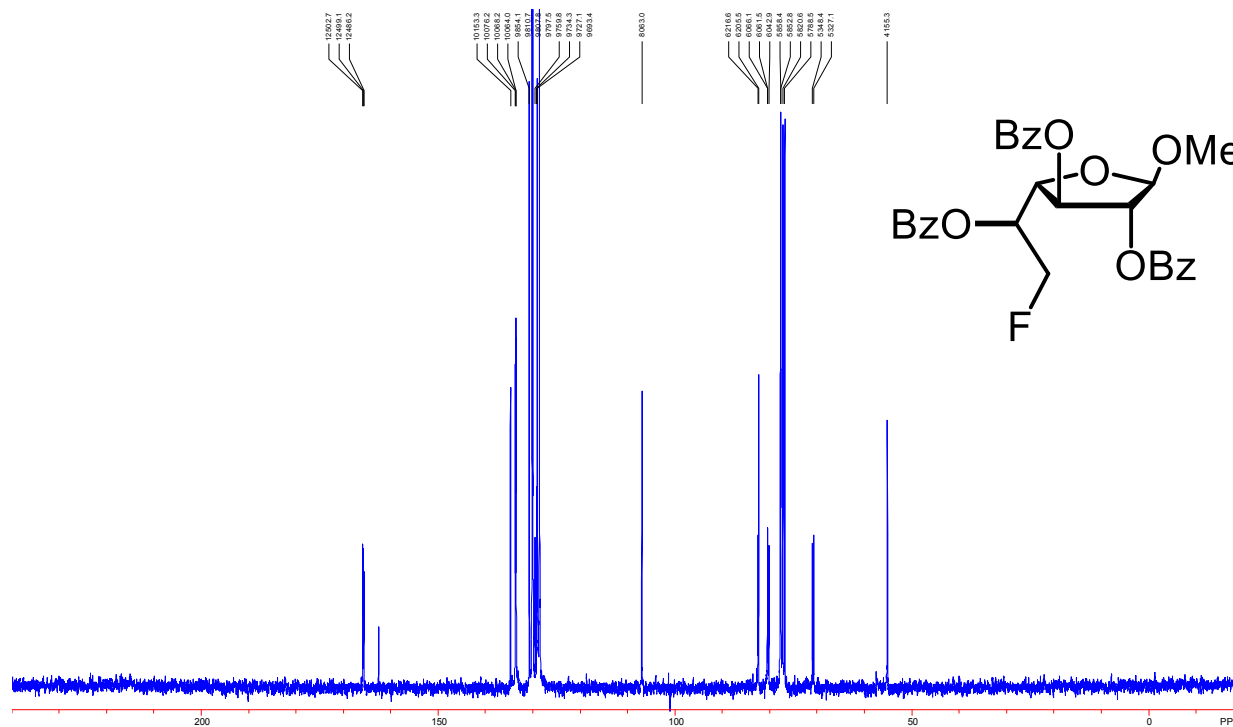1-O-acetyl-2,3,5-tri-O-benzoyl-6-deoxy-6-fluoro-D-galactofuranose:  $^1\text{H}$  NMR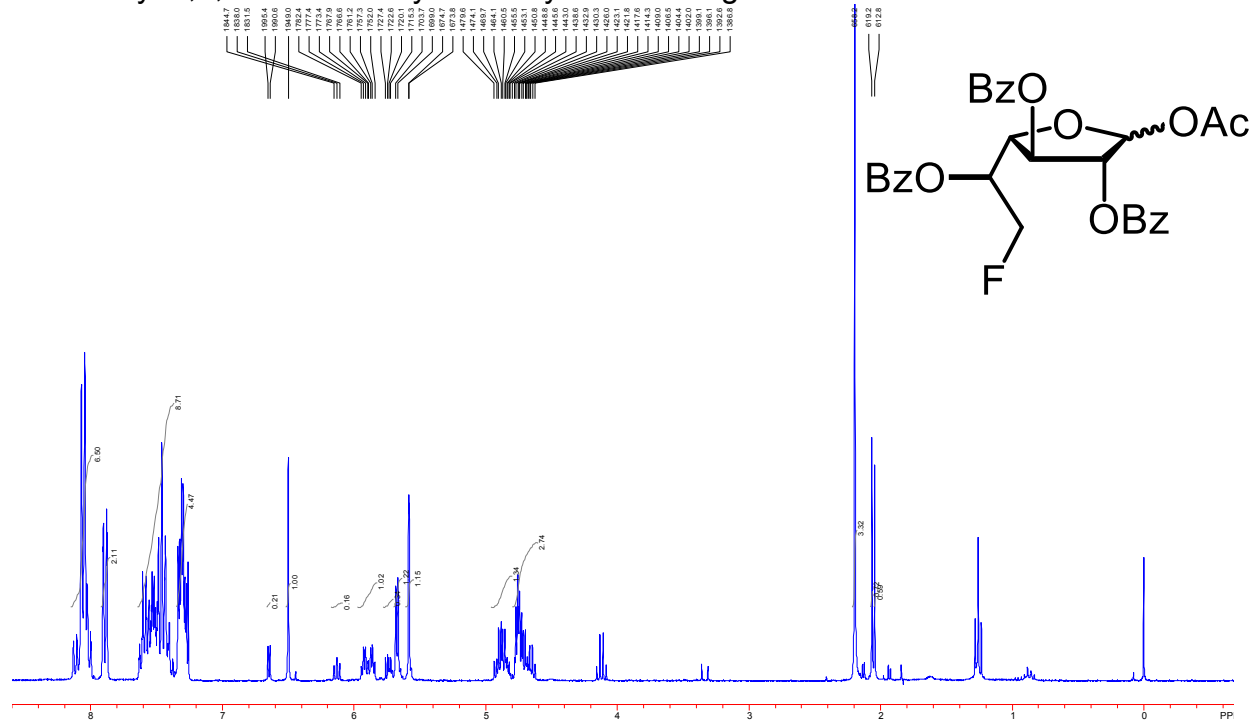

1-O-acetyl-2,3,5-tri-O-benzoyl-6-deoxy-6-fluoro-D-galactofuranose:  $^{19}\text{F}$  NMR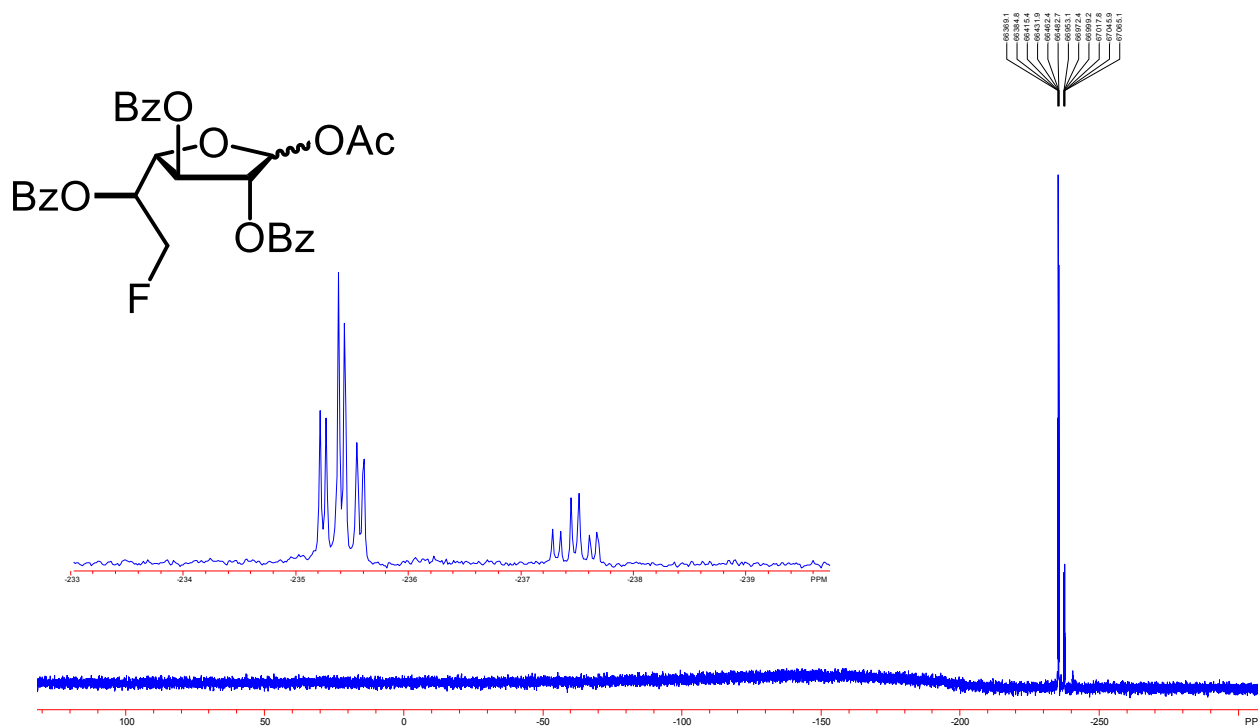1-O-acetyl-2,3,5-tri-O-benzoyl-6-deoxy-6-fluoro-D-galactofuranose:  $^{13}\text{C}$  NMR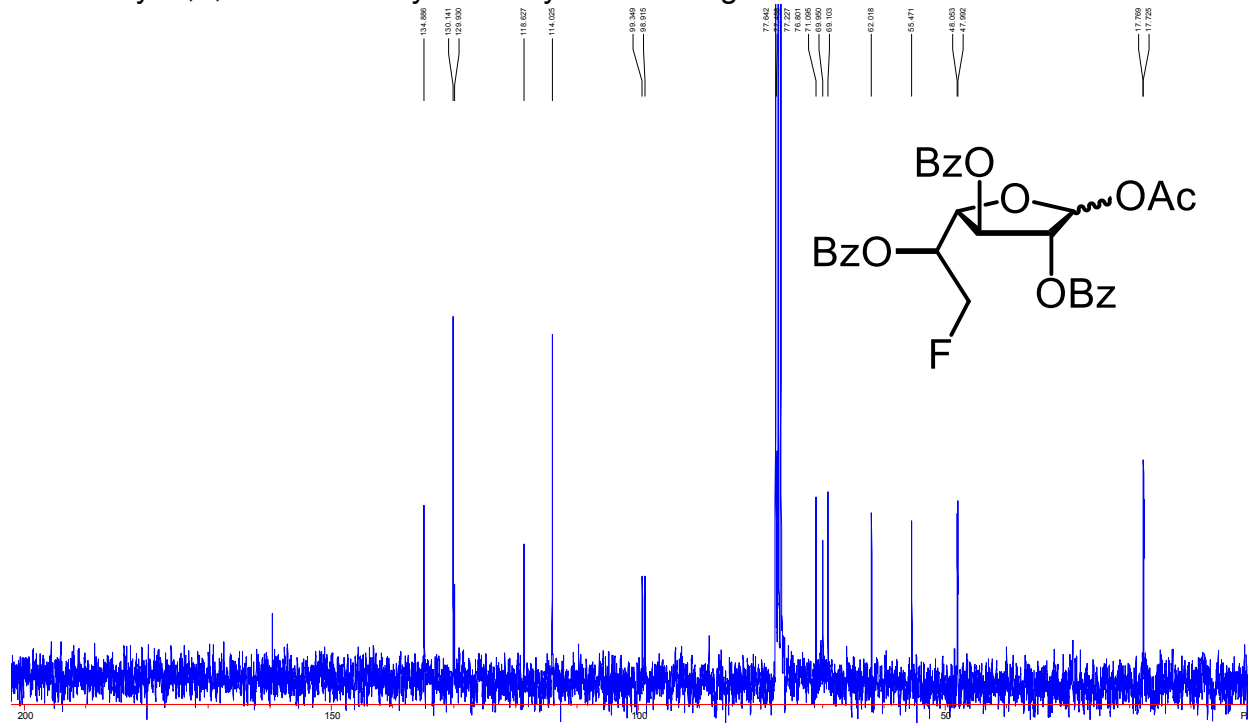



Dibenzyl 2,3,5-tri-O-benzoyl-6-deoxy-6-fluoro- $\alpha$ -D-galactofuranose monophosphate:  $^1\text{H}$  NMR

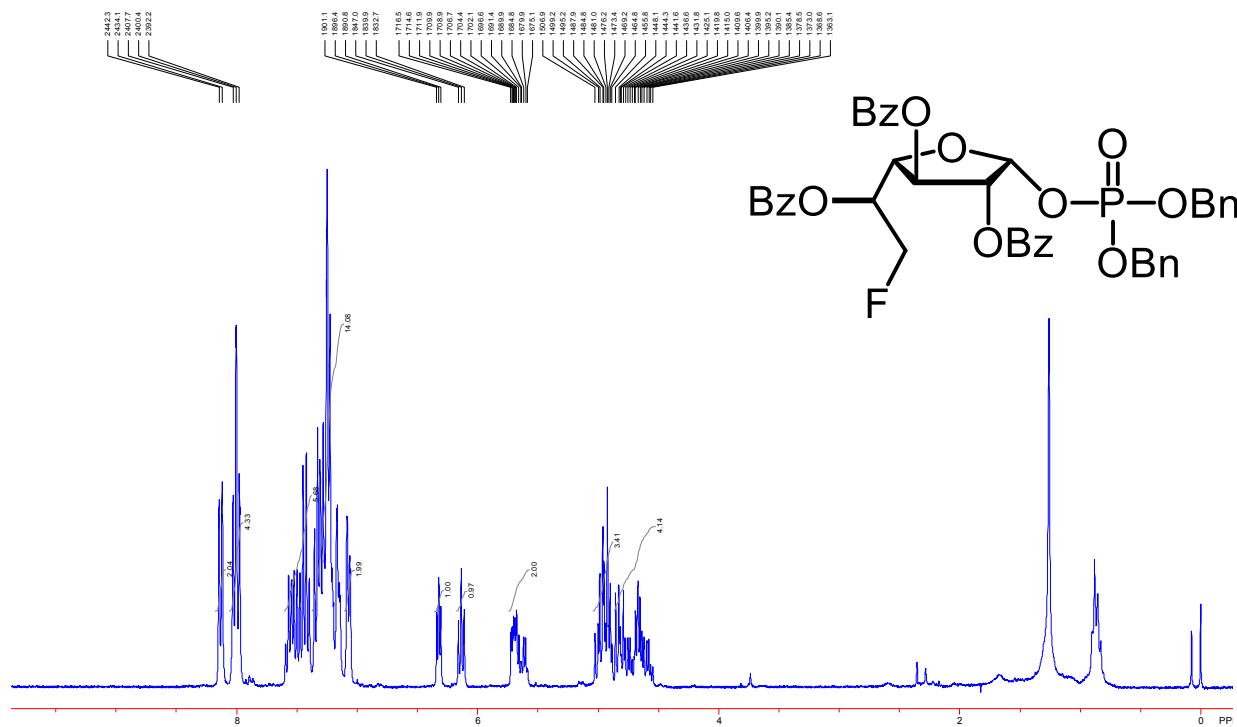

Dibenzyl 2,3,5-tri-O-benzoyl-6-deoxy-6-fluoro- $\alpha$ -D-galactofuranose monophosphate:  $^{19}\text{F}$  NMR

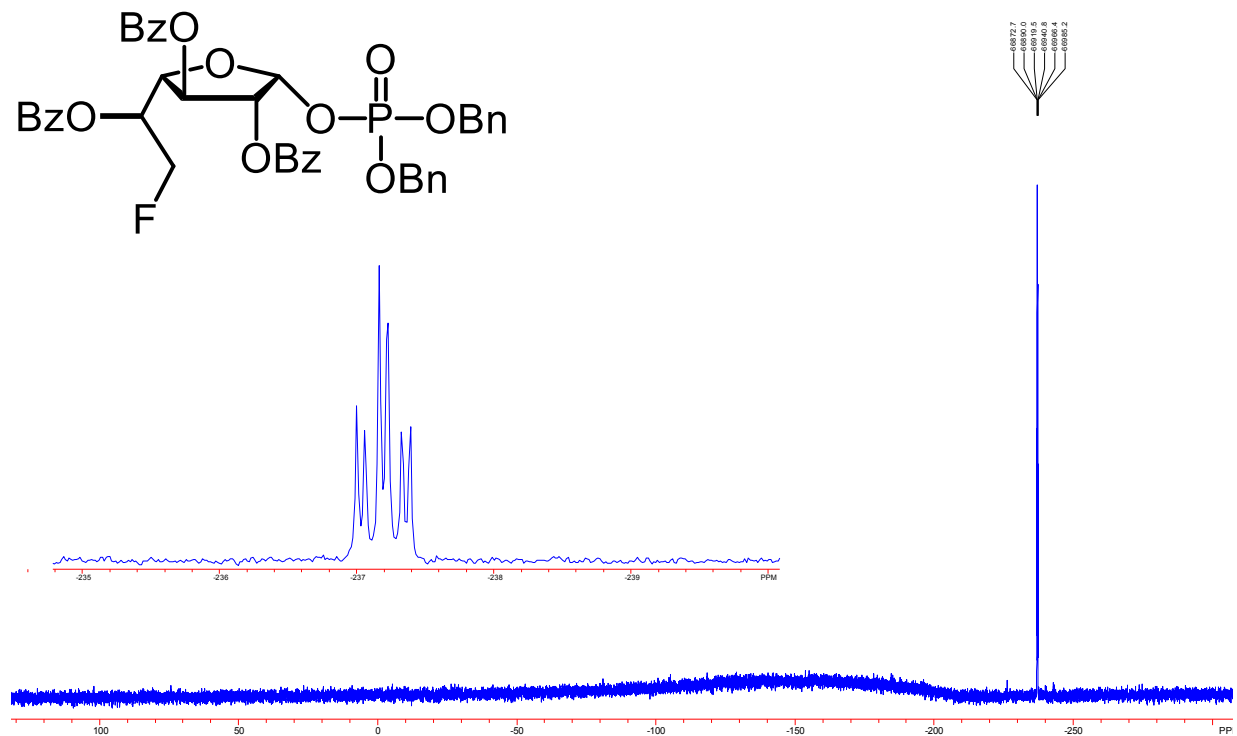

Dibenzyl 2,3,5-tri-O-benzoyl-6-deoxy-6-fluoro- $\alpha$ -D-galactofuranose monophosphate:  $^{31}\text{P}$  NMR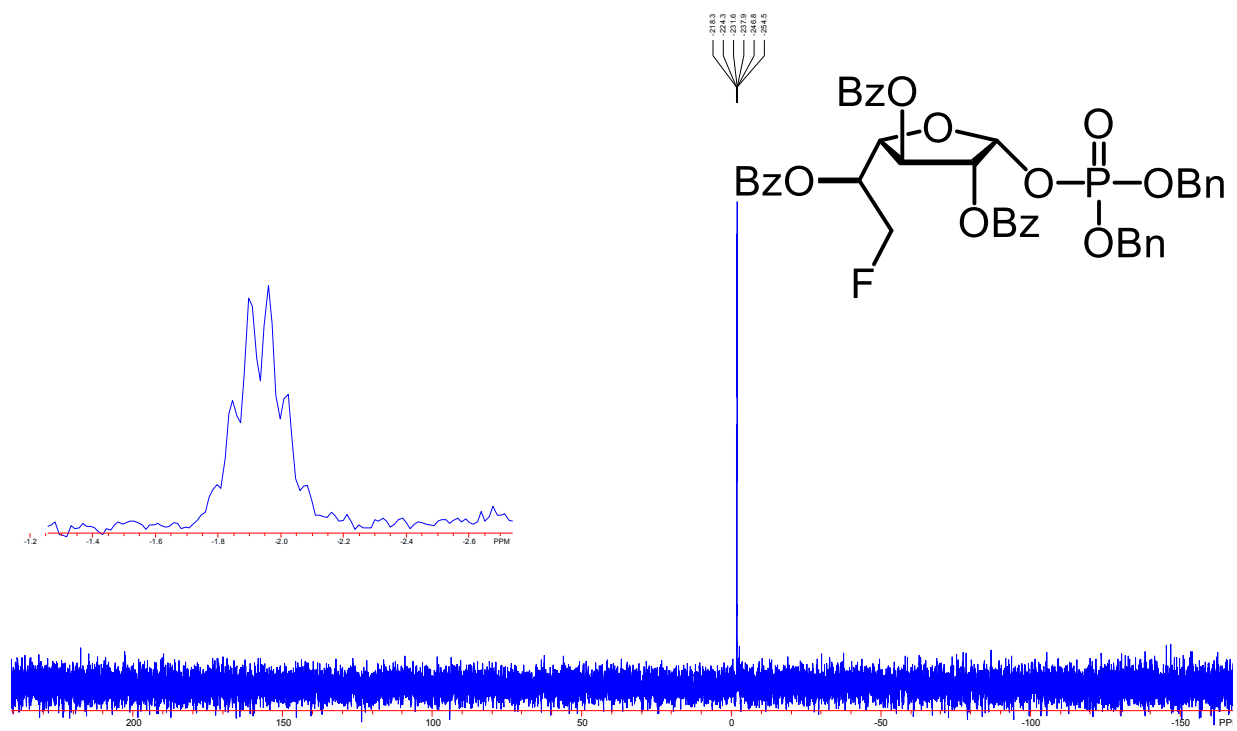Dibenzyl 2,3,5-tri-O-benzoyl-6-deoxy-6-fluoro- $\alpha$ -D-galactofuranose monophosphate:  $^{13}\text{C}$  NMR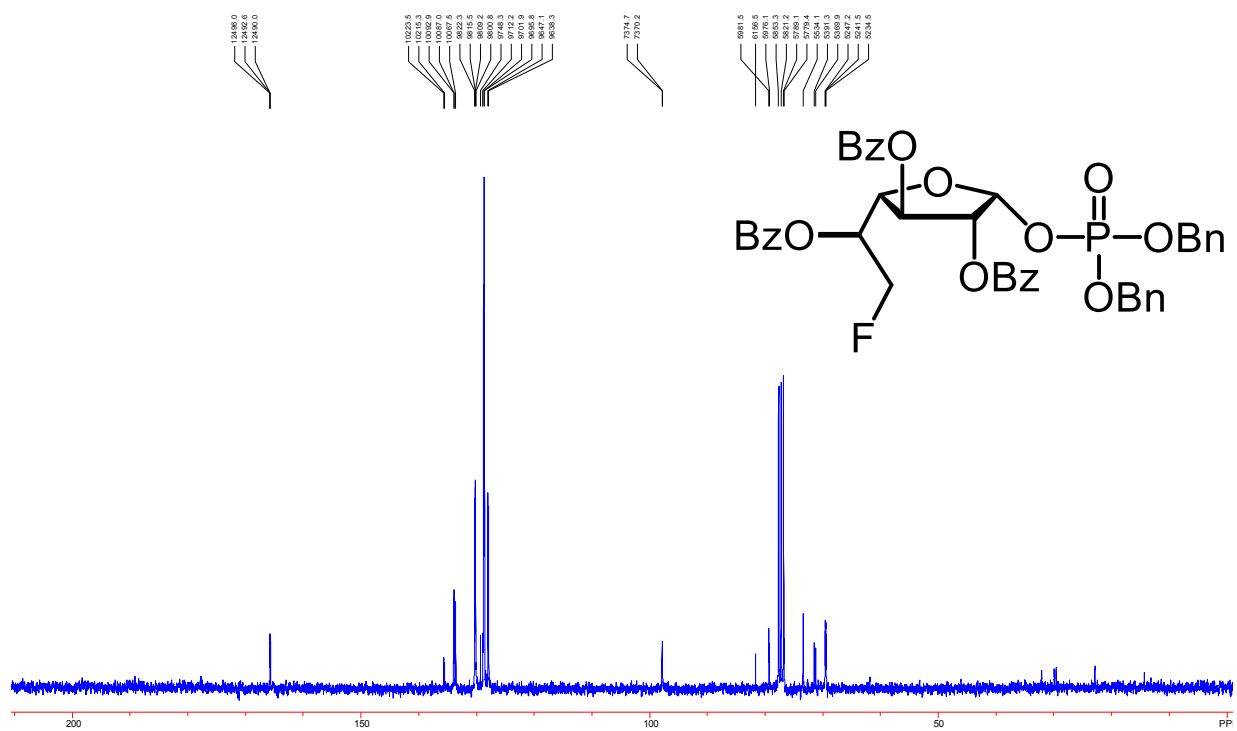

Triethylammonium 2,3,5-tri-O-benzoyl-6-deoxy-6-fluoro- $\alpha$ -D-galactofuranose monophosphate:  
 $^1\text{H}$  NMR

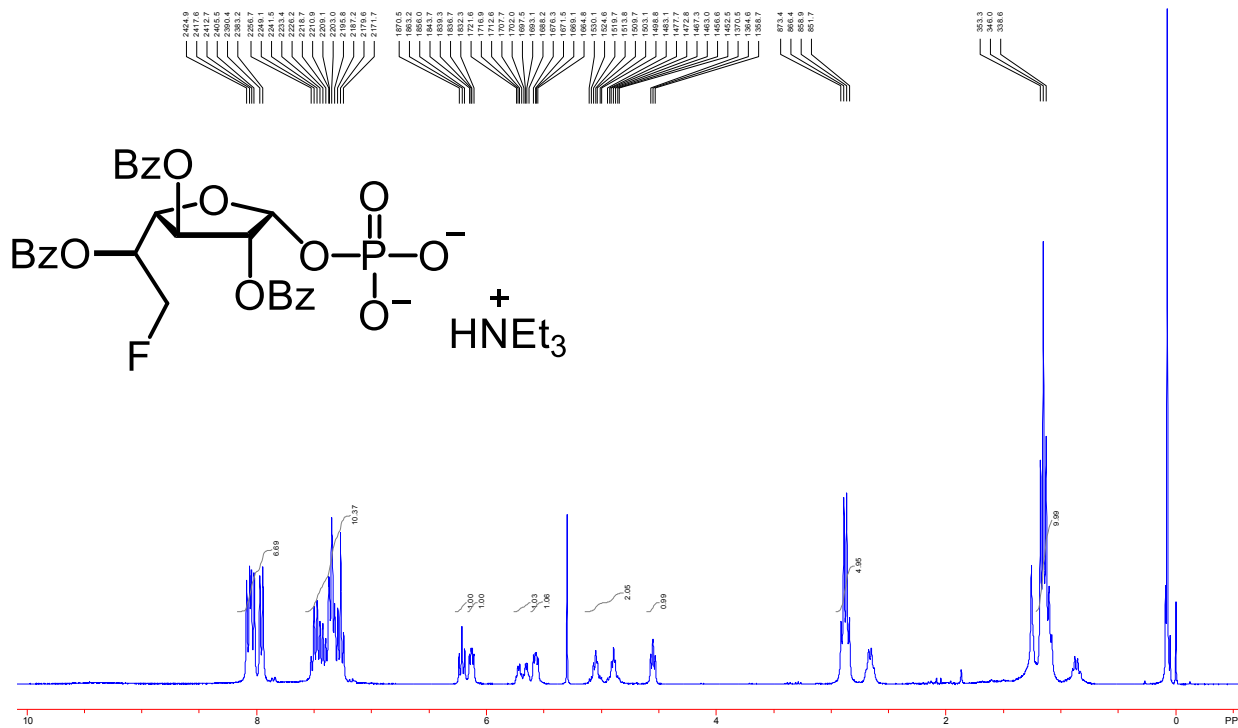

Triethylammonium 2,3,5-tri-O-benzoyl-6-deoxy-6-fluoro- $\alpha$ -D-galactofuranose monophosphate:  
 $^{19}\text{F}$  NMR

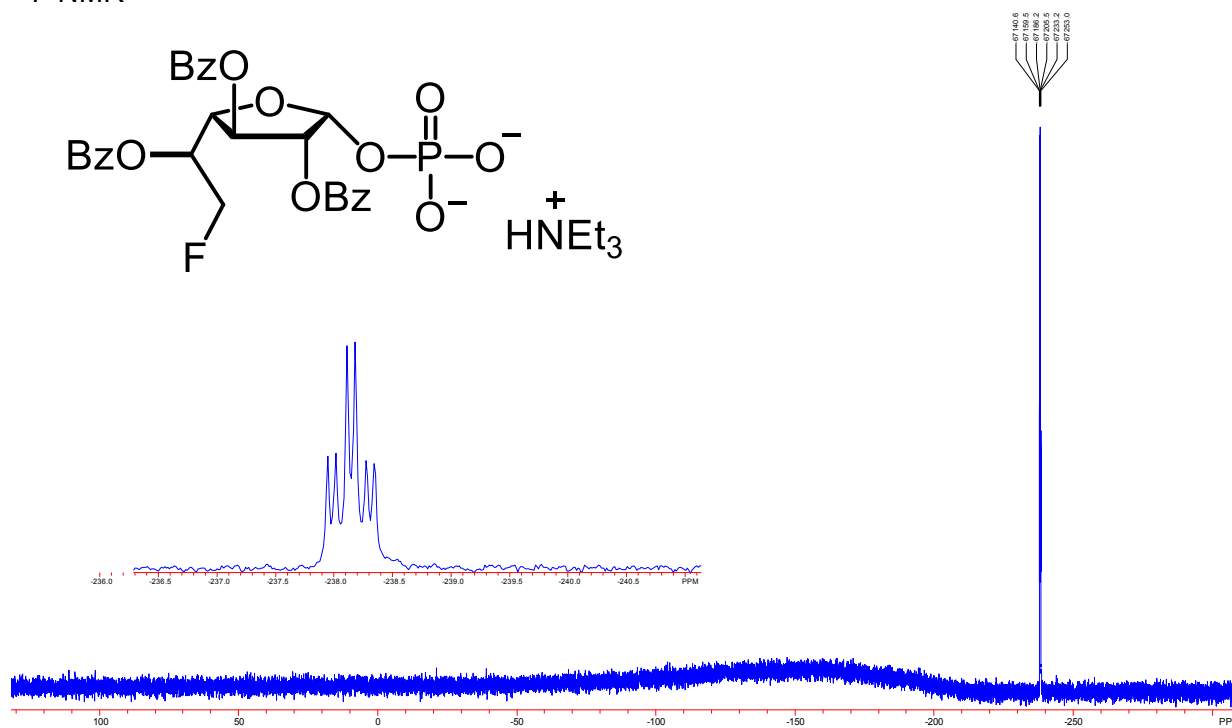

Triethylammonium 2,3,5-tri-O-benzoyl-6-deoxy-6-fluoro- $\alpha$ -D-galactofuranose monophosphate:  
 $^{31}\text{P}$  NMR

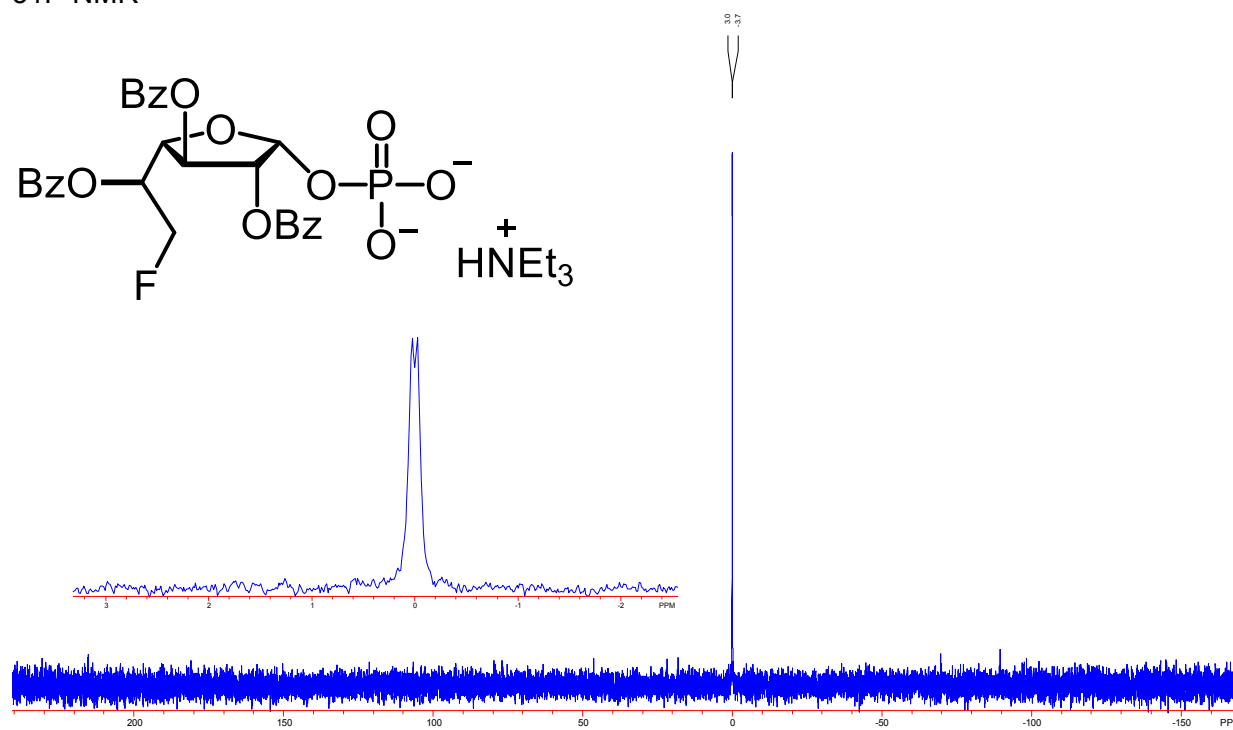

Triethylammonium 2,3,5-tri-O-benzoyl-6-deoxy-6-fluoro- $\alpha$ -D-galactofuranose monophosphate:  
 $^{13}\text{C}$  NMR

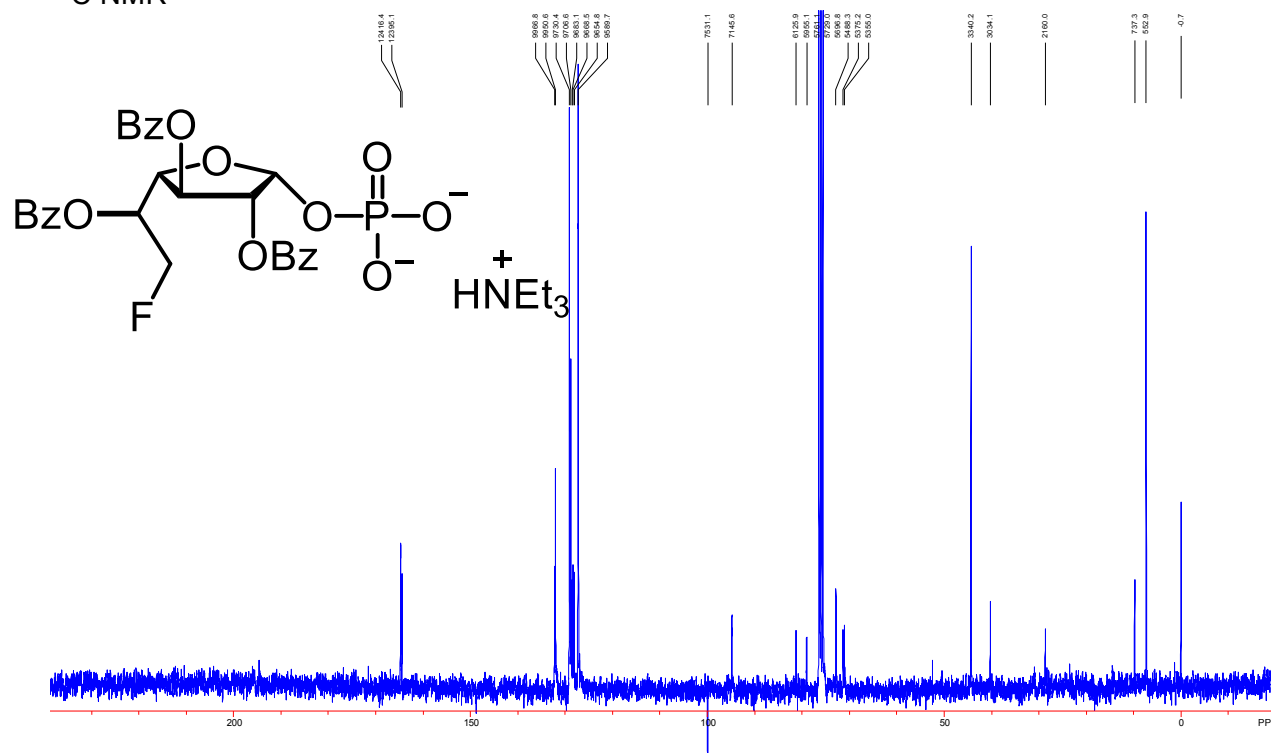

Tributylammonium 6-deoxy-6-fluoro- $\alpha$ -D-galactofuranose monophosphate:  $^1\text{H}$  NMR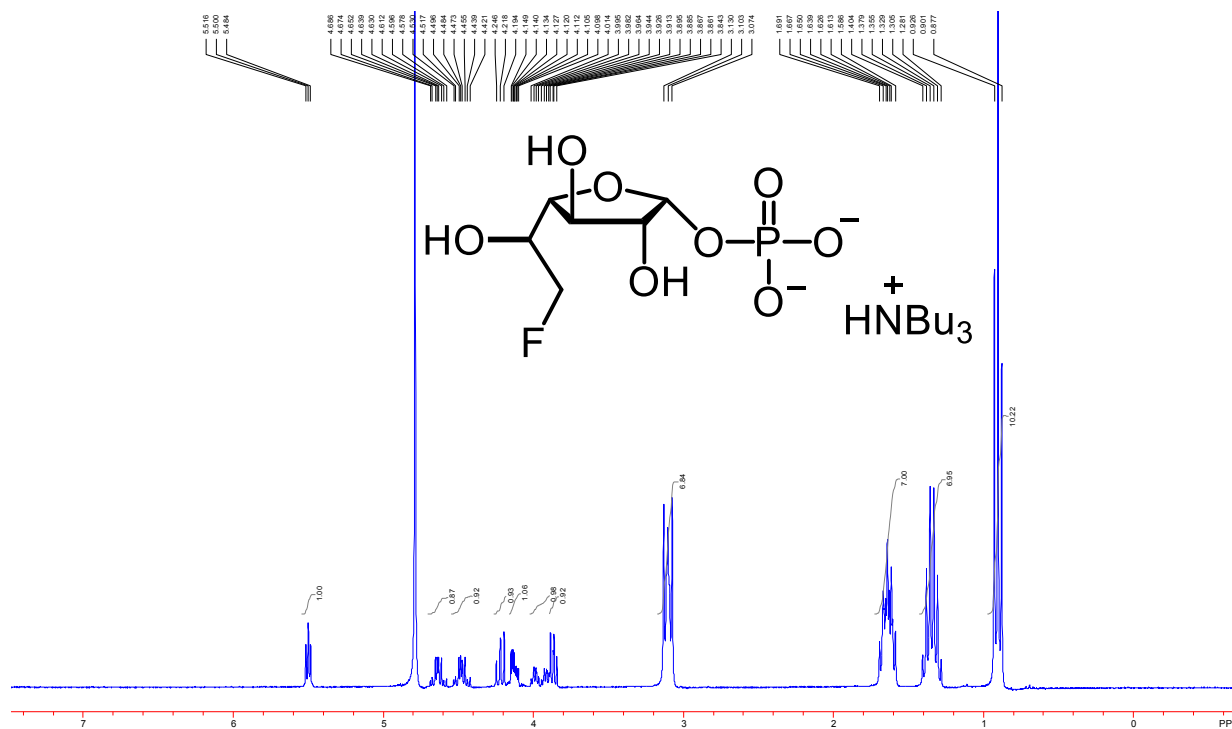Tributylammonium 6-deoxy-6-fluoro- $\alpha$ -D-galactofuranose monophosphate:  $^{19}\text{F}$  NMR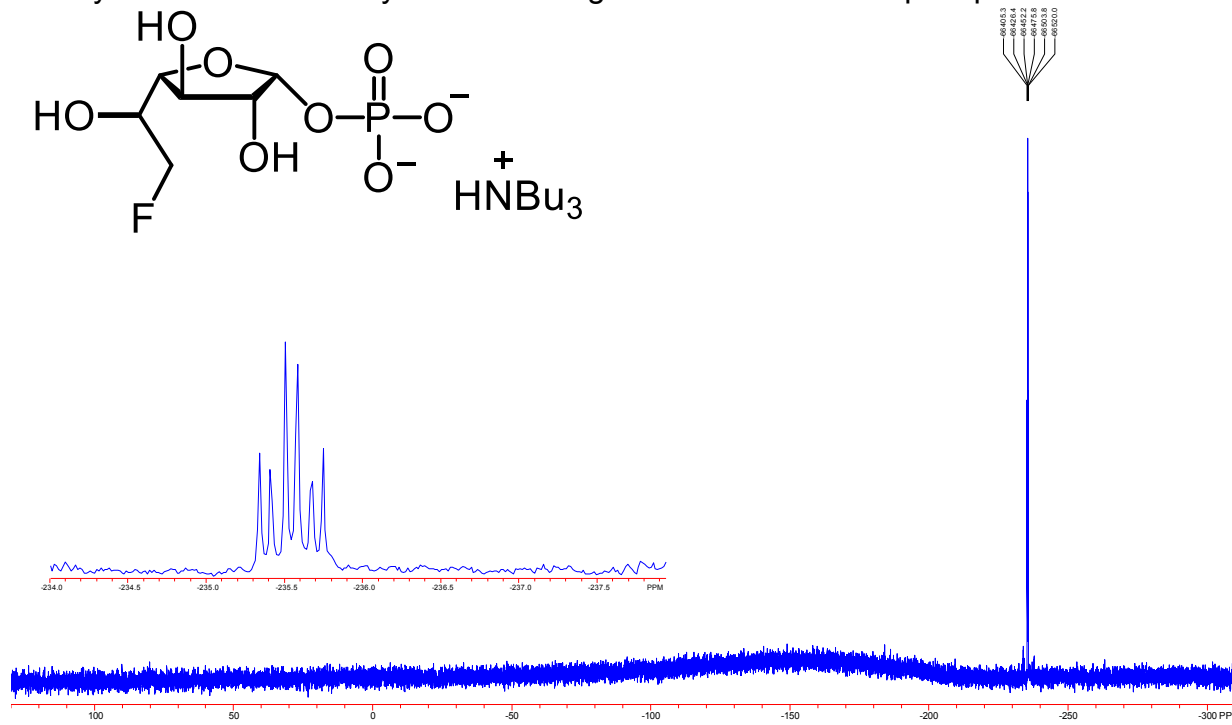

Tributylammonium 6-deoxy-6-fluoro- $\alpha$ -D-galactofuranose monophosphate:  $^{31}\text{P}$  NMR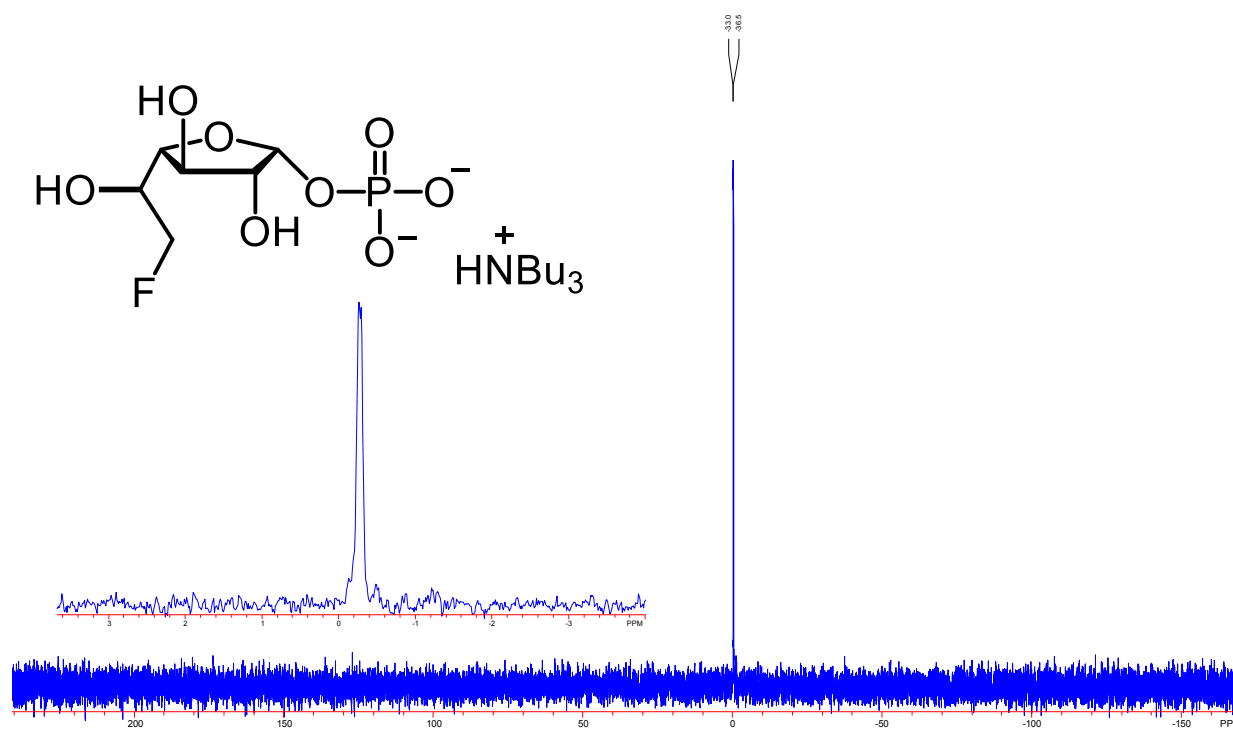Tributylammonium 6-deoxy-6-fluoro- $\alpha$ -D-galactofuranose monophosphate:  $^{13}\text{C}$  NMR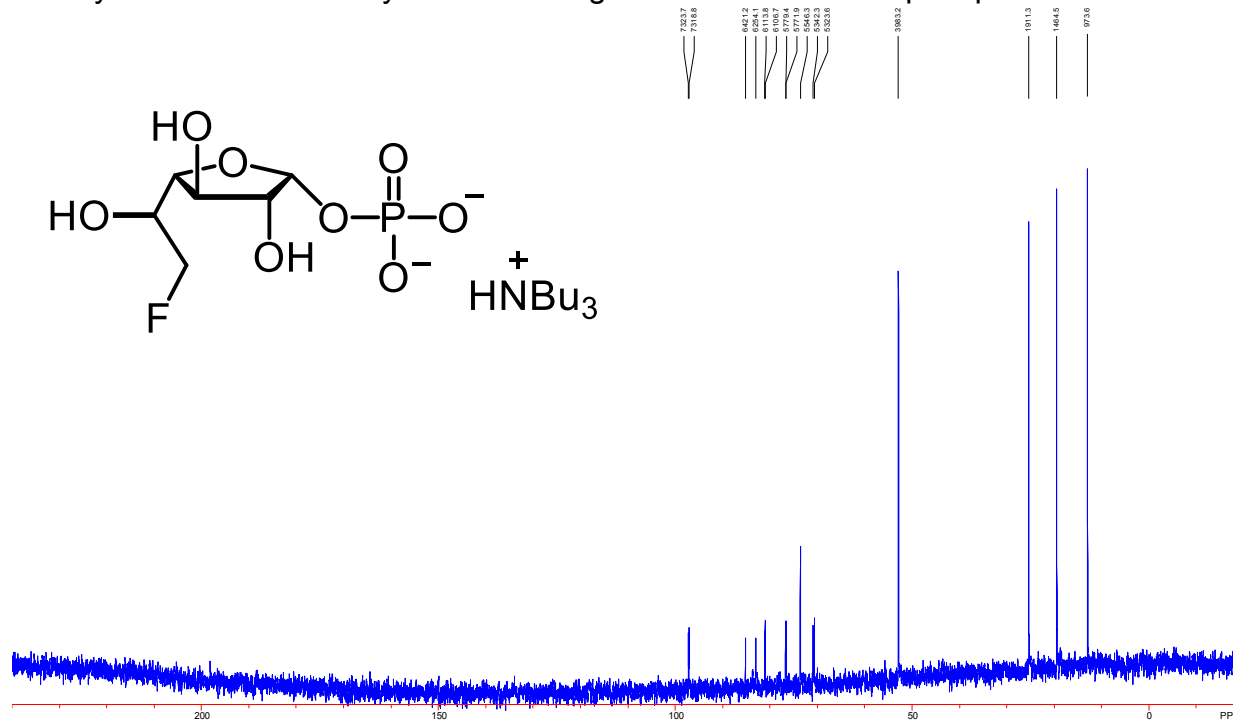

UDP-6F-Galf (2):  $^1\text{H}$  NMR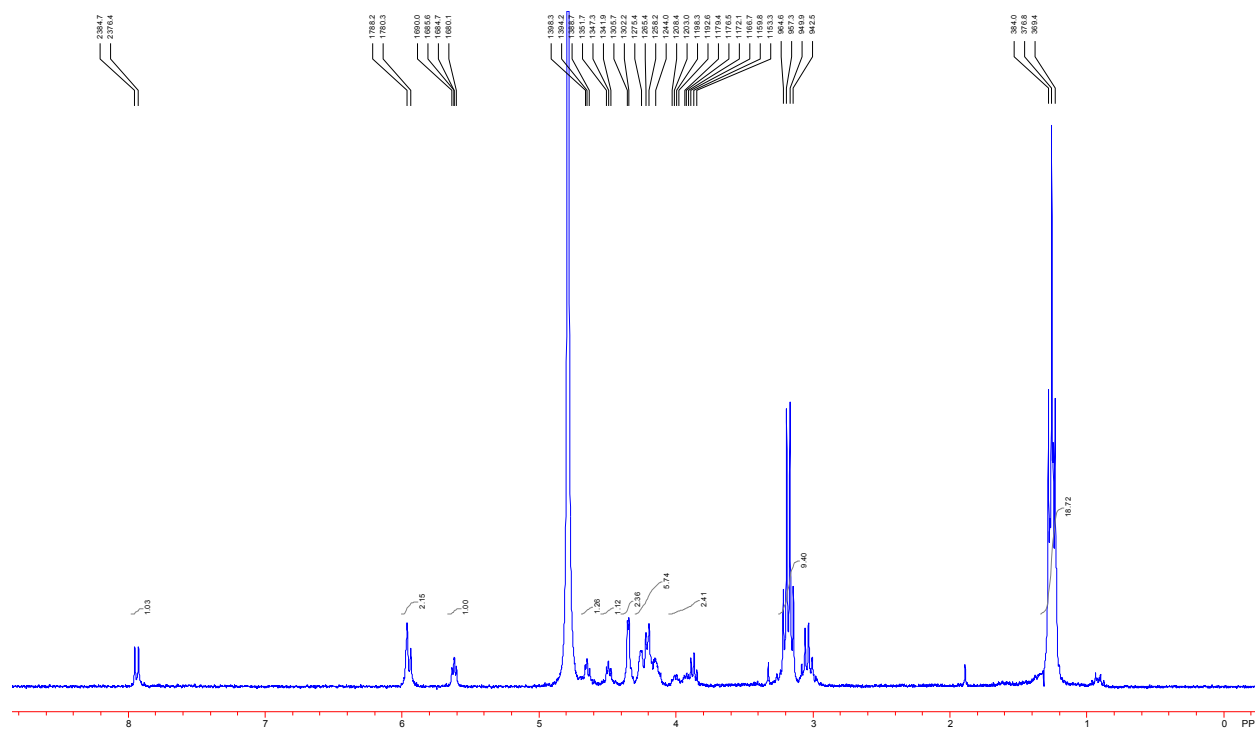UDP-6F-Galf (2):  $^{19}\text{F}$  NMR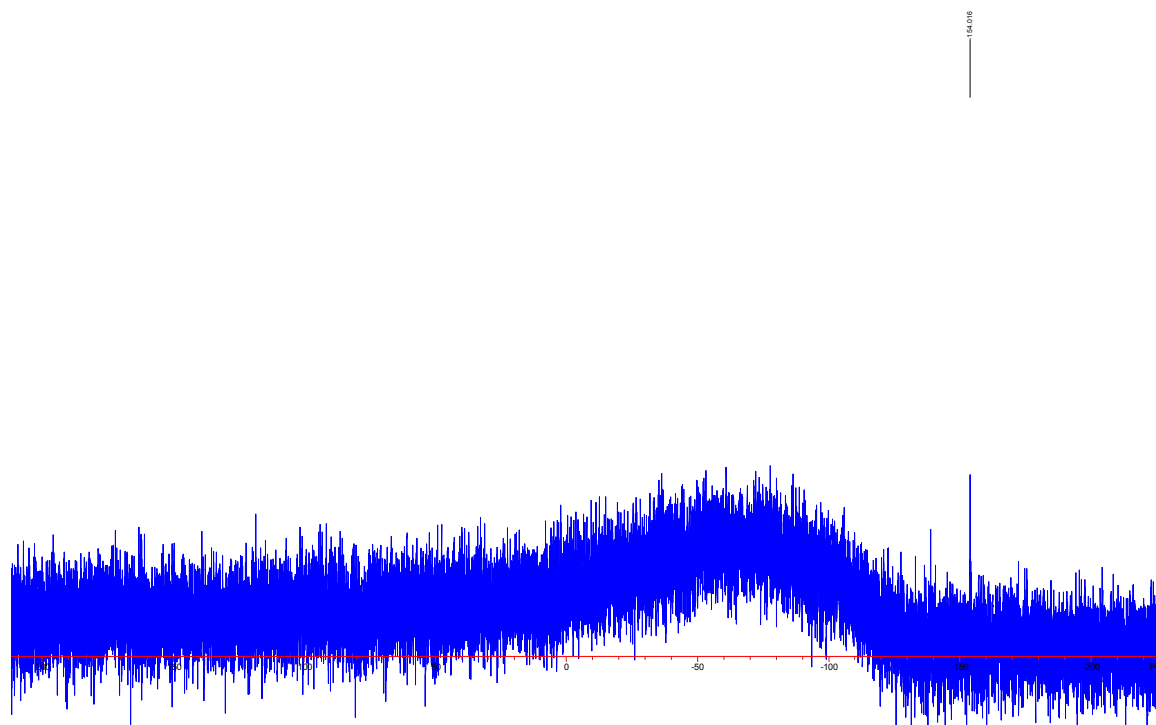

UDP-6F-Galf (2):  $^{13}\text{C}$  NMR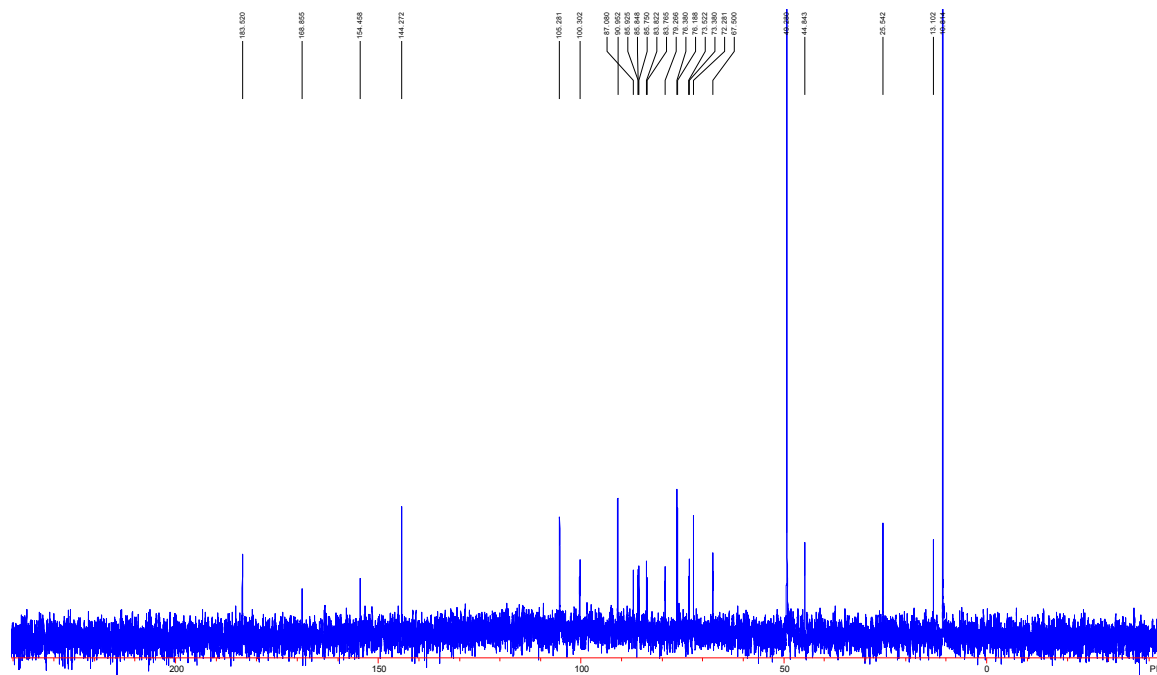2,3-di-O-benzyl-beta-L-methylaltrofuranose (9):  $^1\text{H}$  NMR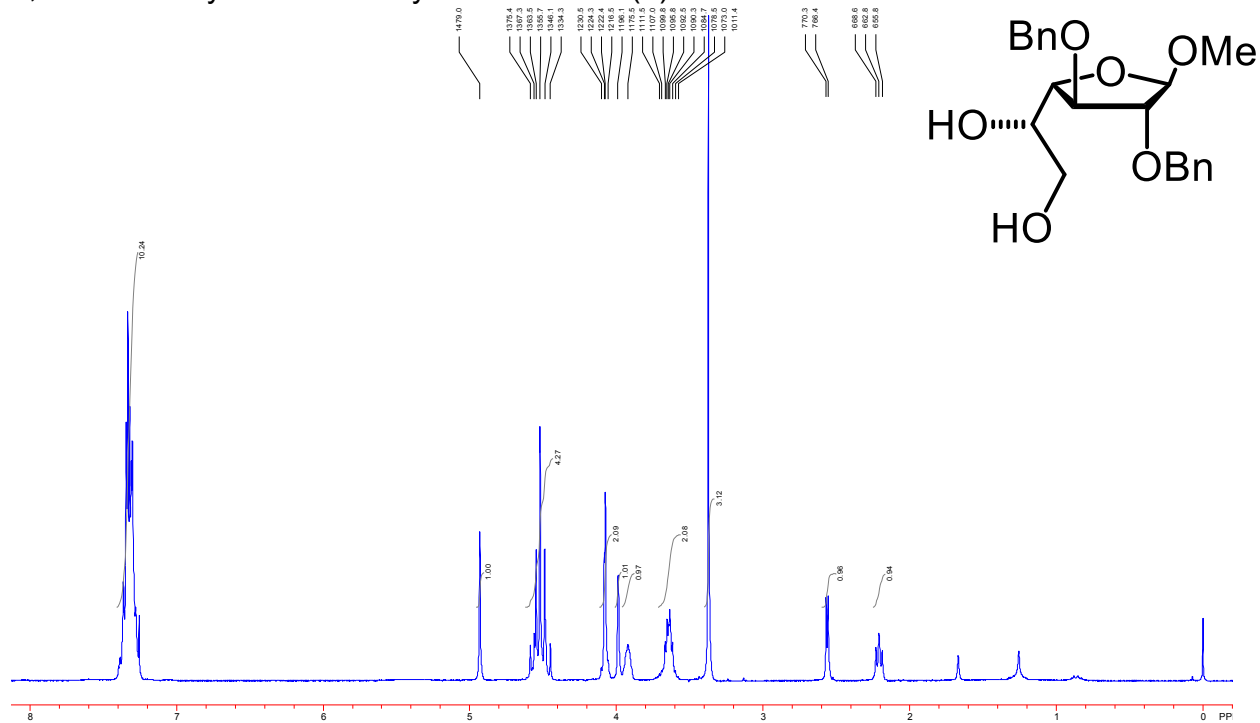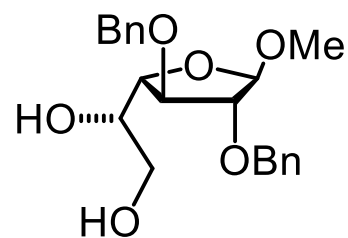



2,3-di-O-benzyl-beta-L-methylaltrofuranose (**9**):  $^1\text{H}$  NMR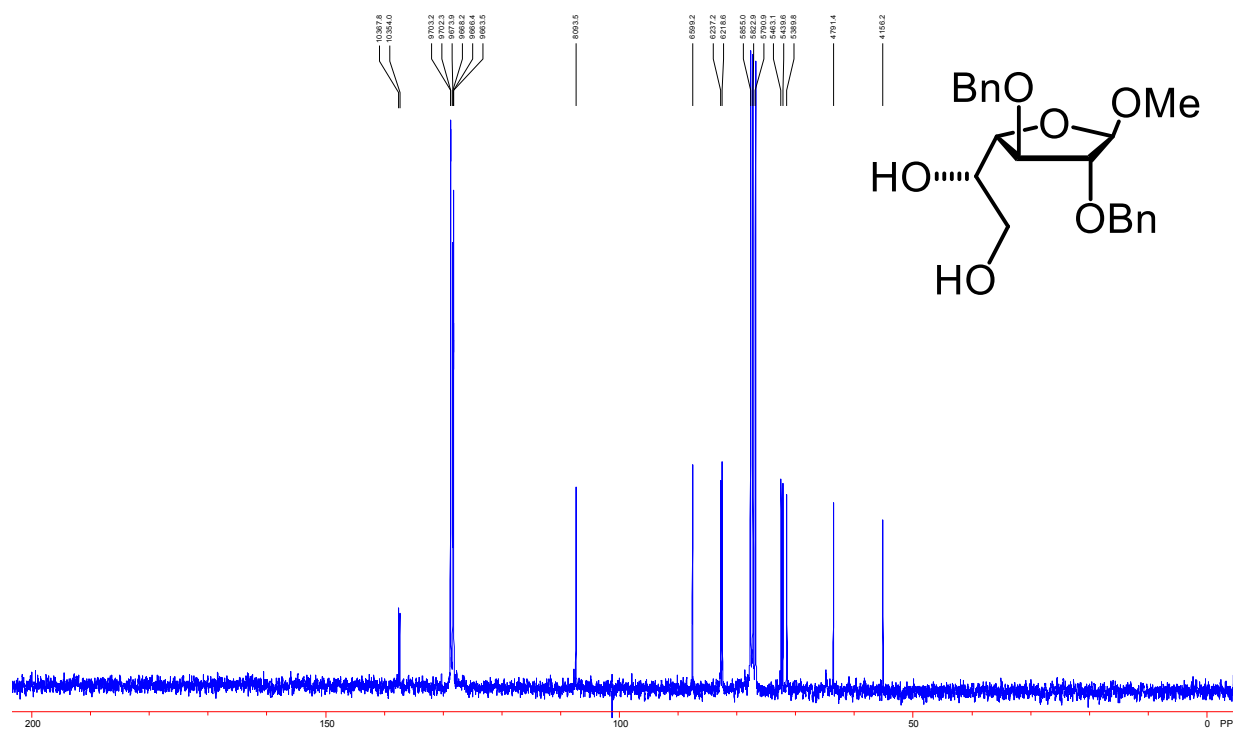2,3,6-tri-O-benzyl-beta-L-methylaltrofuranose:  $^1\text{H}$  NMR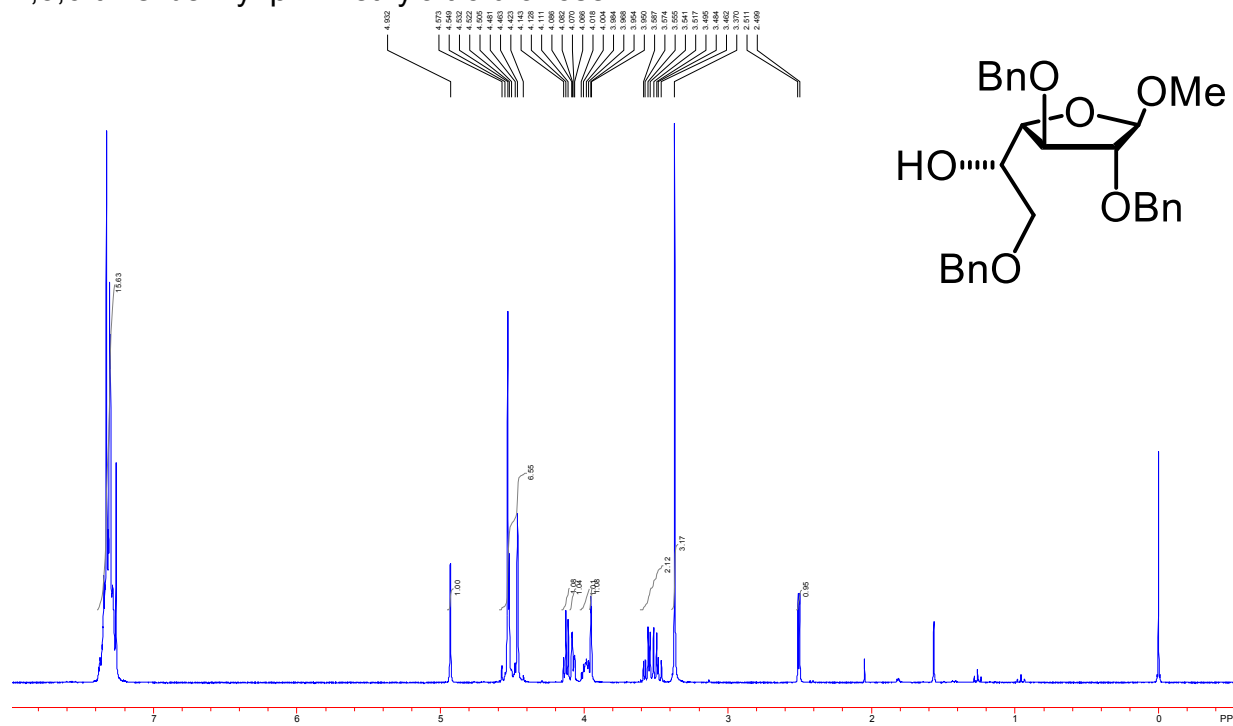

2,3,6-tri-O-benzyl- $\beta$ -L-methylaltrofuranose:  $^{13}\text{C}$  NMR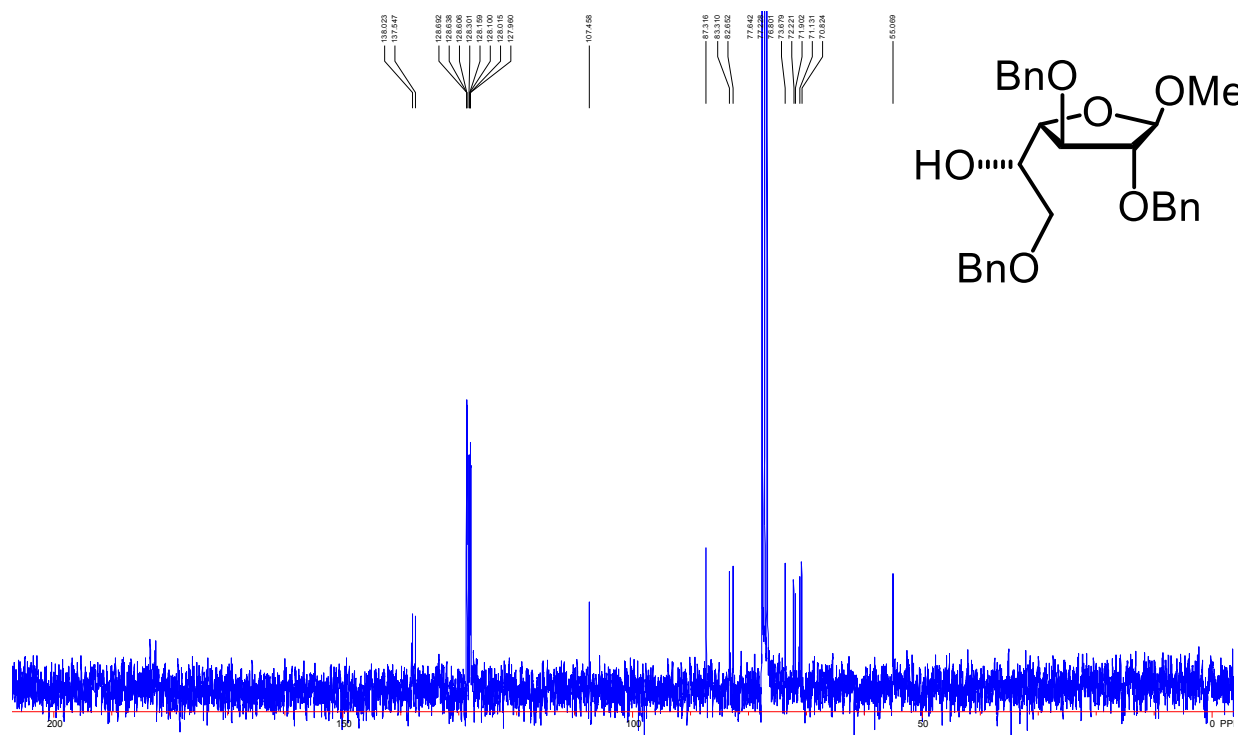2,3,6-tri-O-benzyl-5-deoxy-5-fluoro- $\beta$ -D-methyl galactofuranose:  $^1\text{H}$  NMR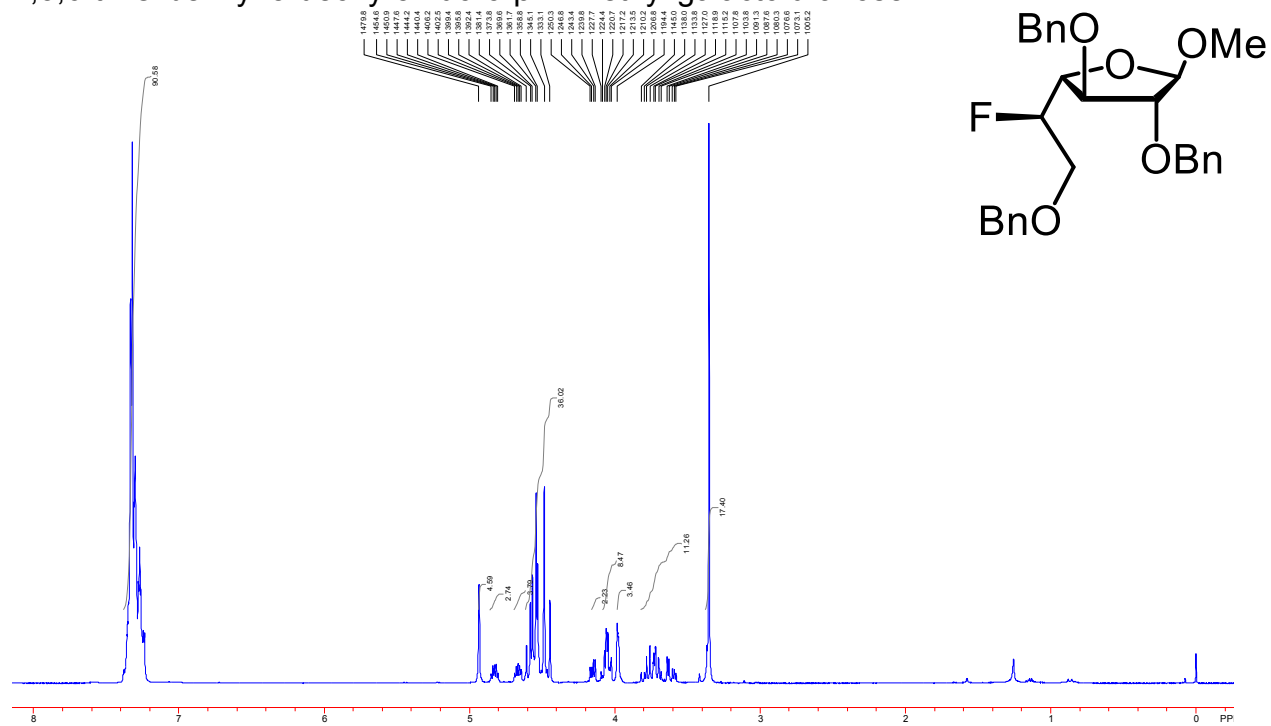

2,3,6-tri-O-benzyl-5-deoxy-5-fluoro- $\beta$ -D-methyl galactofuranose:  $^{19}\text{F}$  NMR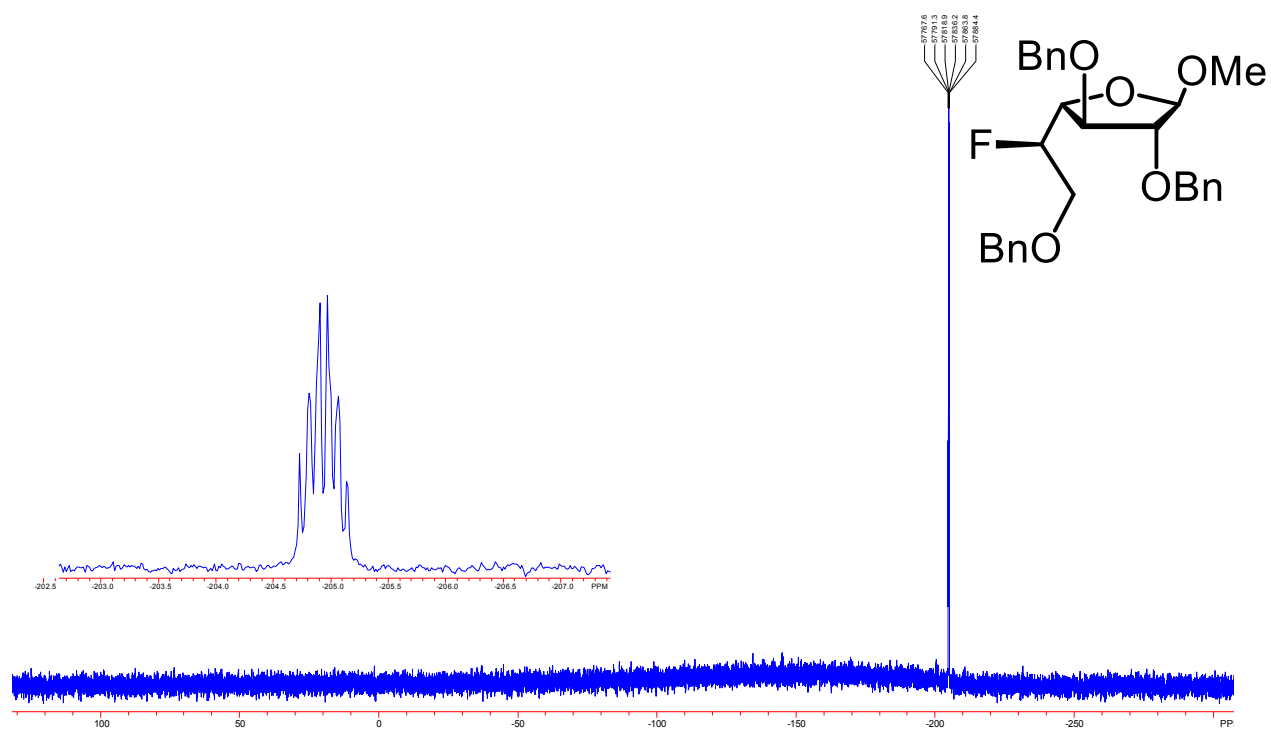2,3,6-tri-O-benzyl-5-deoxy-5-fluoro- $\beta$ -D-methyl galactofuranose:  $^{13}\text{C}$  NMR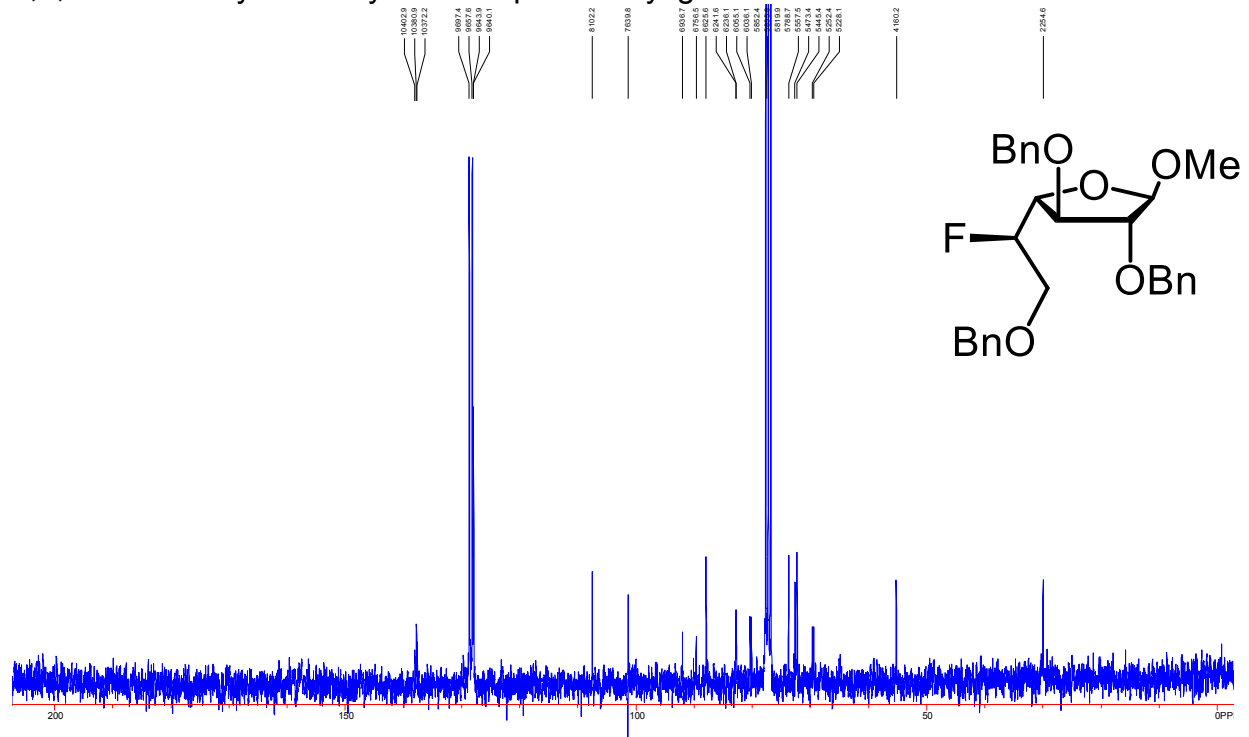

5-deoxy-5-fluoro-beta-D-methyl galactofuranose (**11**):  $^1\text{H}$  NMR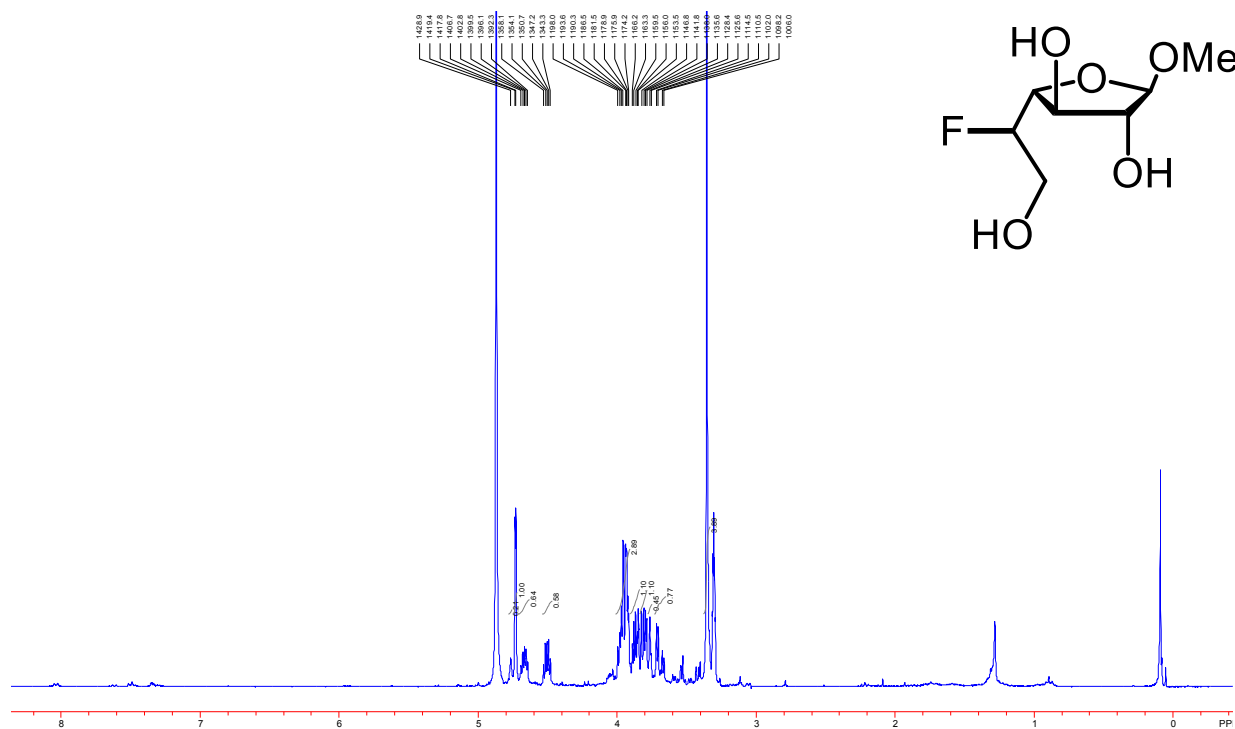5-deoxy-5-fluoro-beta-D-methyl galactofuranose (**11**):  $^{19}\text{F}$  NMR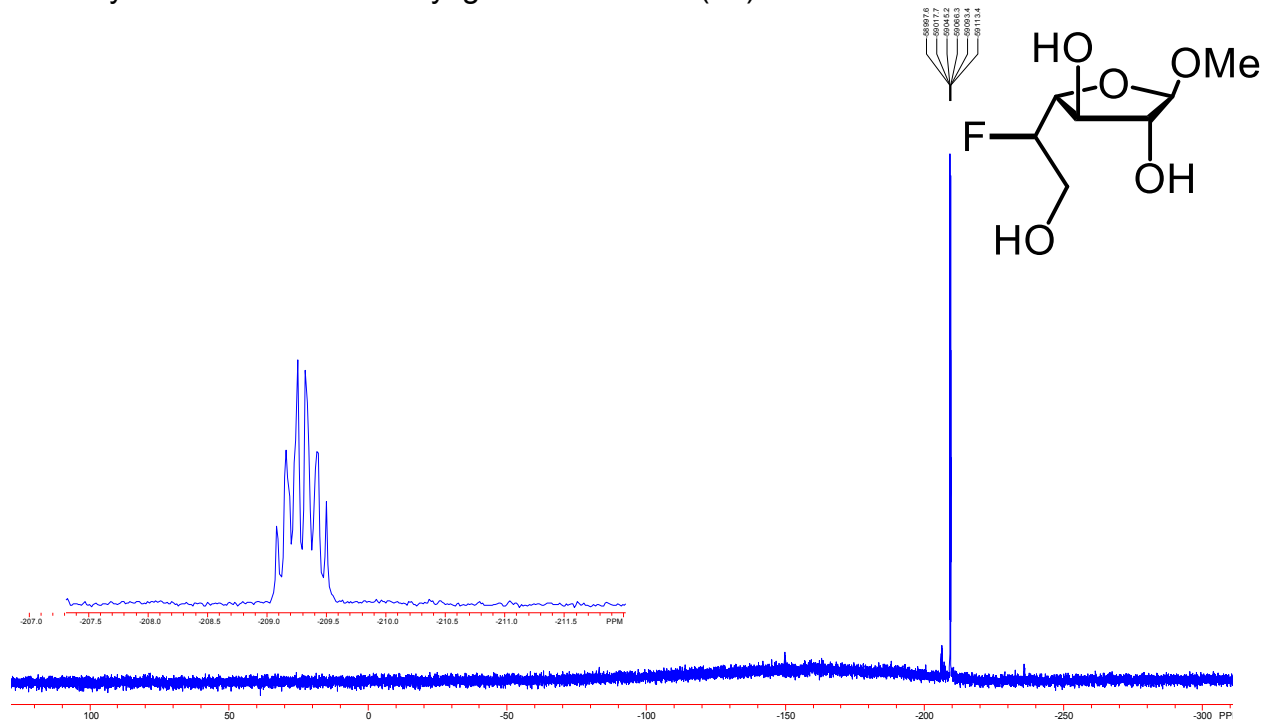

5-deoxy-5-fluoro-beta-D-methyl galactofuranose (**11**):  $^{13}\text{C}$  NMR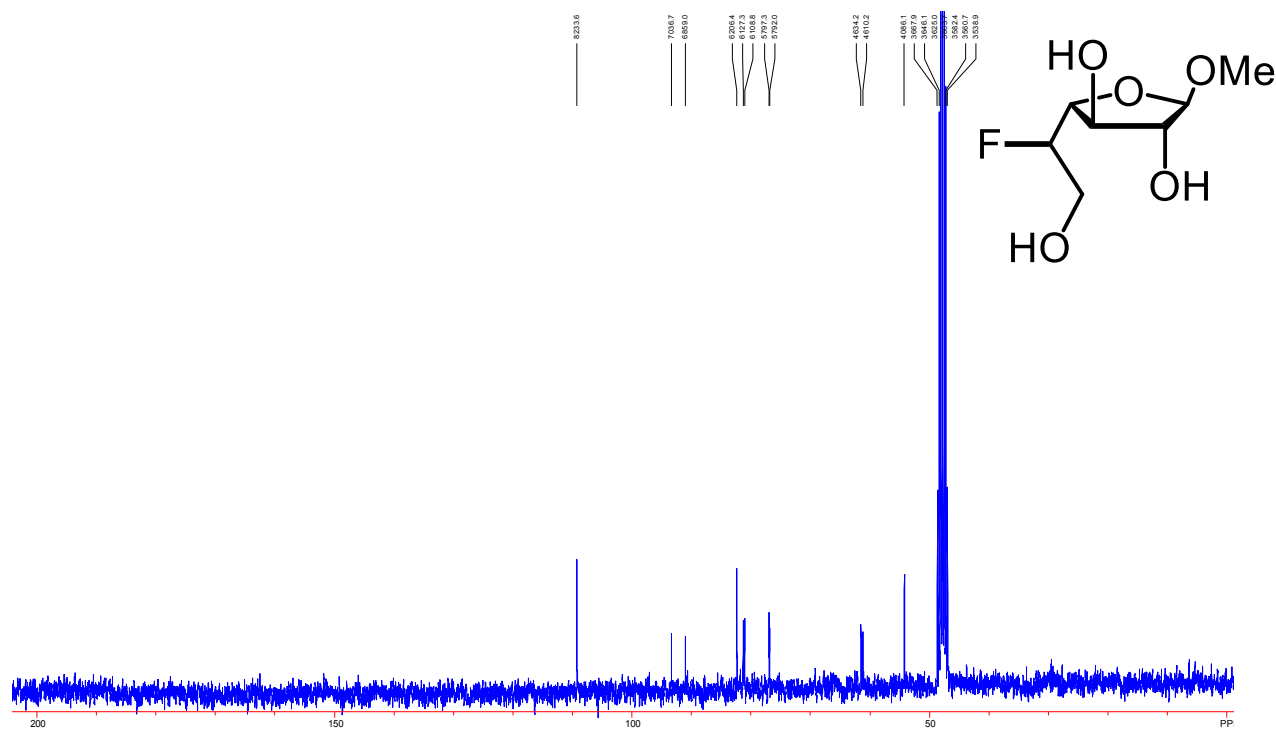2,3,6-tri-O-benzoyl-5-deoxy-5-fluoro- $\beta$ -D-methyl galactofuranose:  $^1\text{H}$  NMR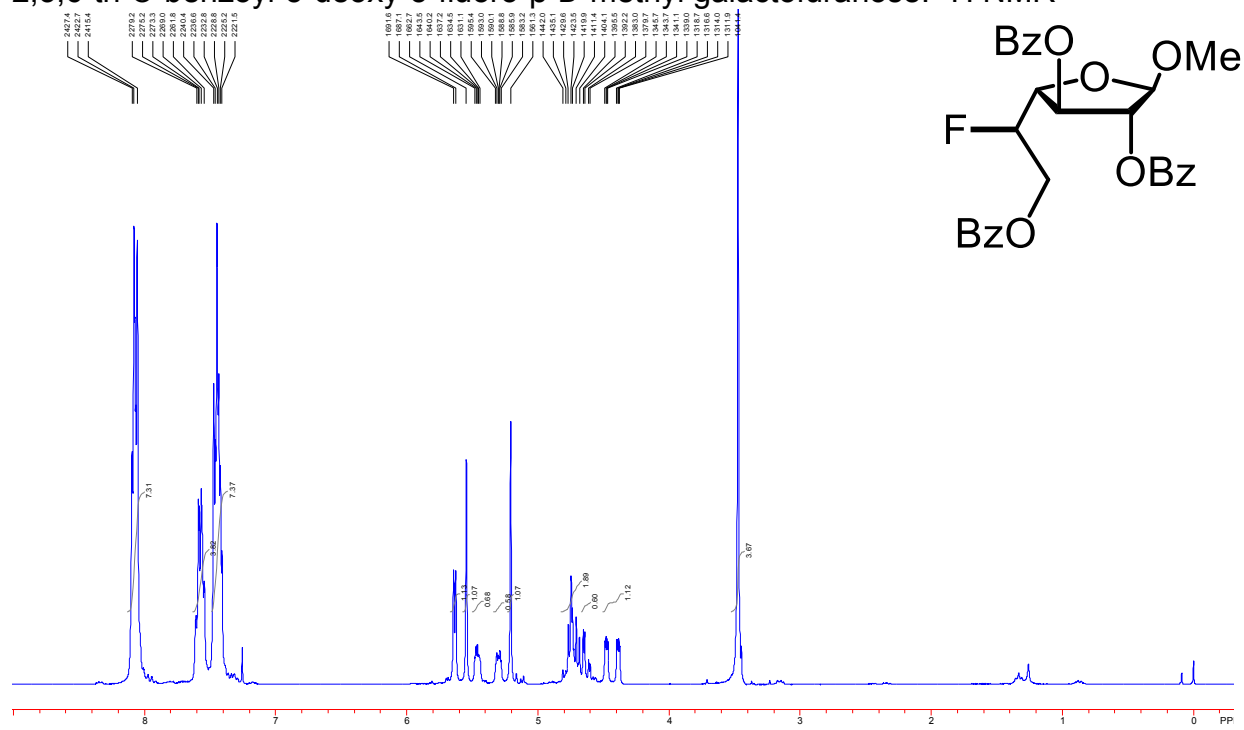

2,3,6-tri-O-benzoyl-5-deoxy-5-fluoro- $\beta$ -D-methyl galactofuranose:  $^{19}\text{F}$  NMR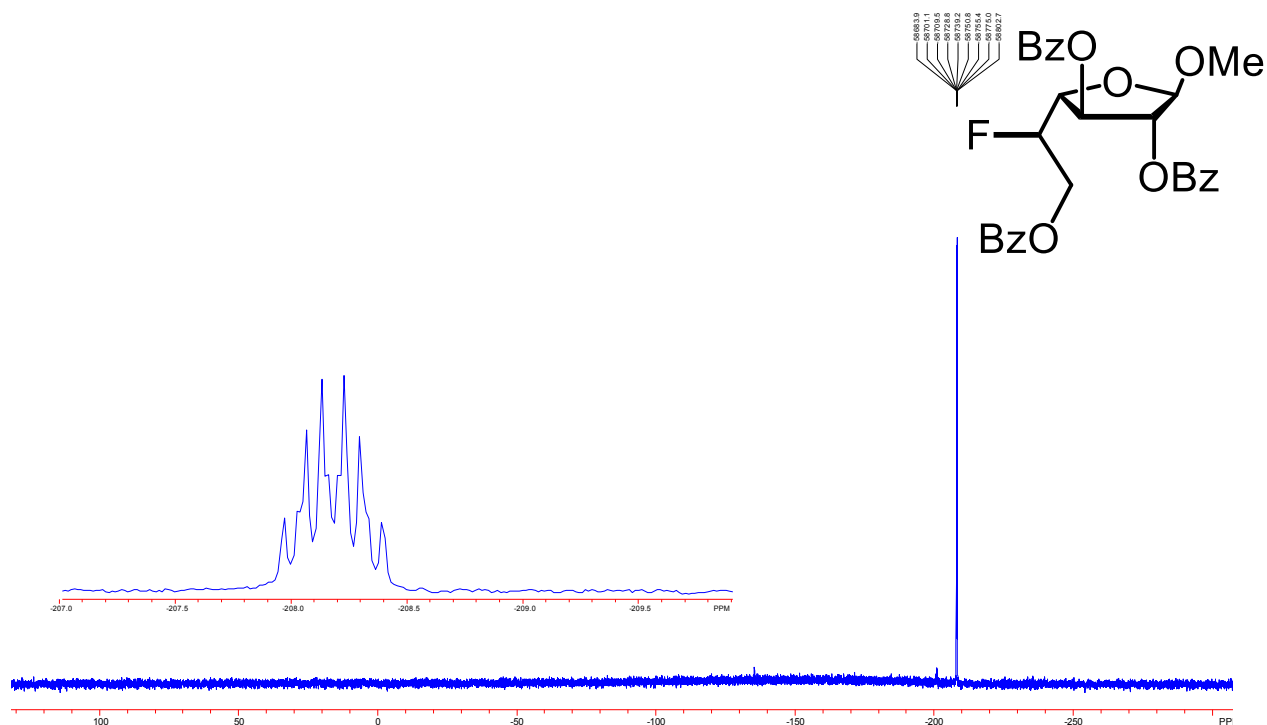2,3,6-tri-O-benzoyl-5-deoxy-5-fluoro- $\beta$ -D-methyl galactofuranose:  $^{13}\text{C}$  NMR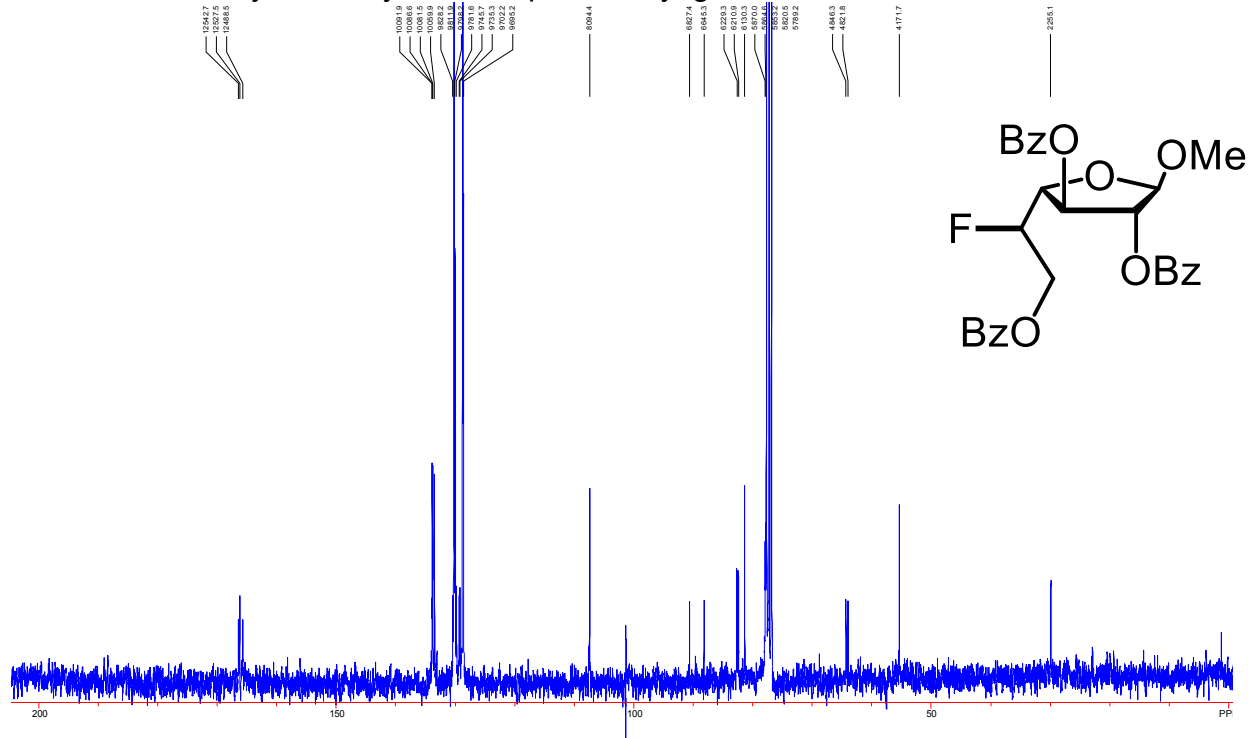







Dibenzyl 2,3,6-tri-O-benzoyl-5-deoxy-5-fluoro- $\alpha$ -D-galactofuranose monophosphate:  $^{19}\text{F}$  NMR

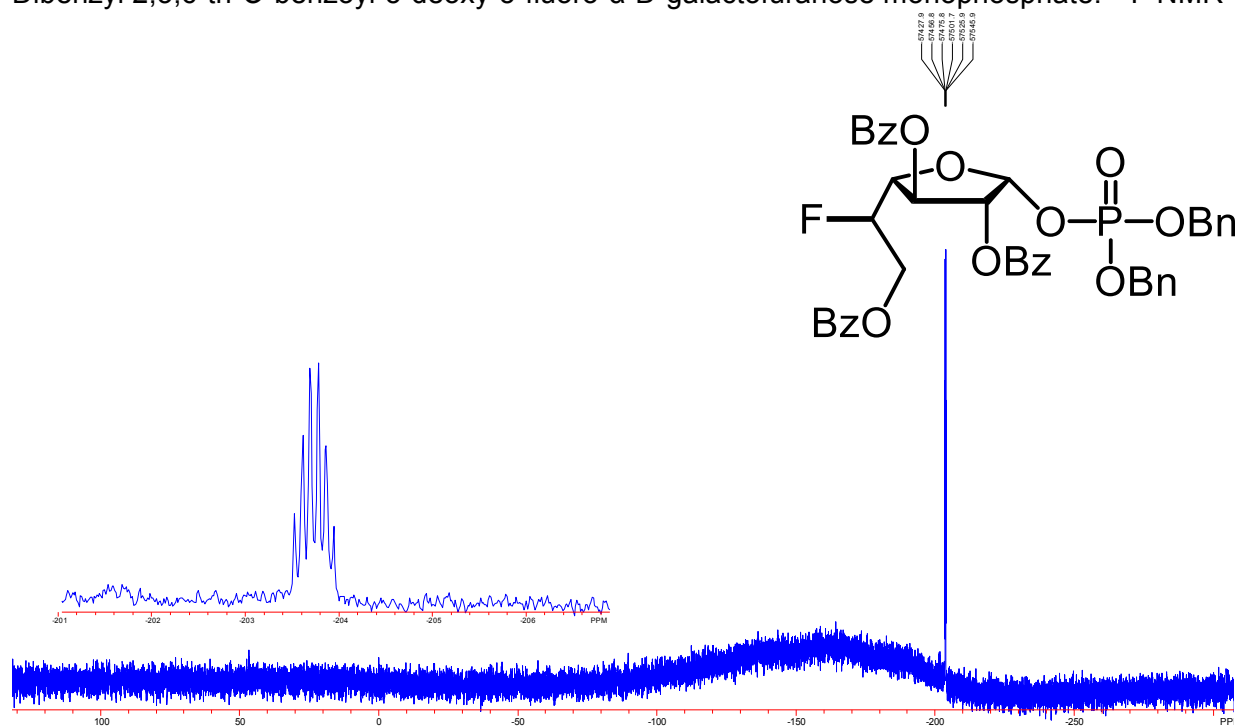

Dibenzyl 2,3,6-tri-O-benzoyl-5-deoxy-5-fluoro- $\alpha$ -D-galactofuranose monophosphate:  $^{31}\text{P}$  NMR

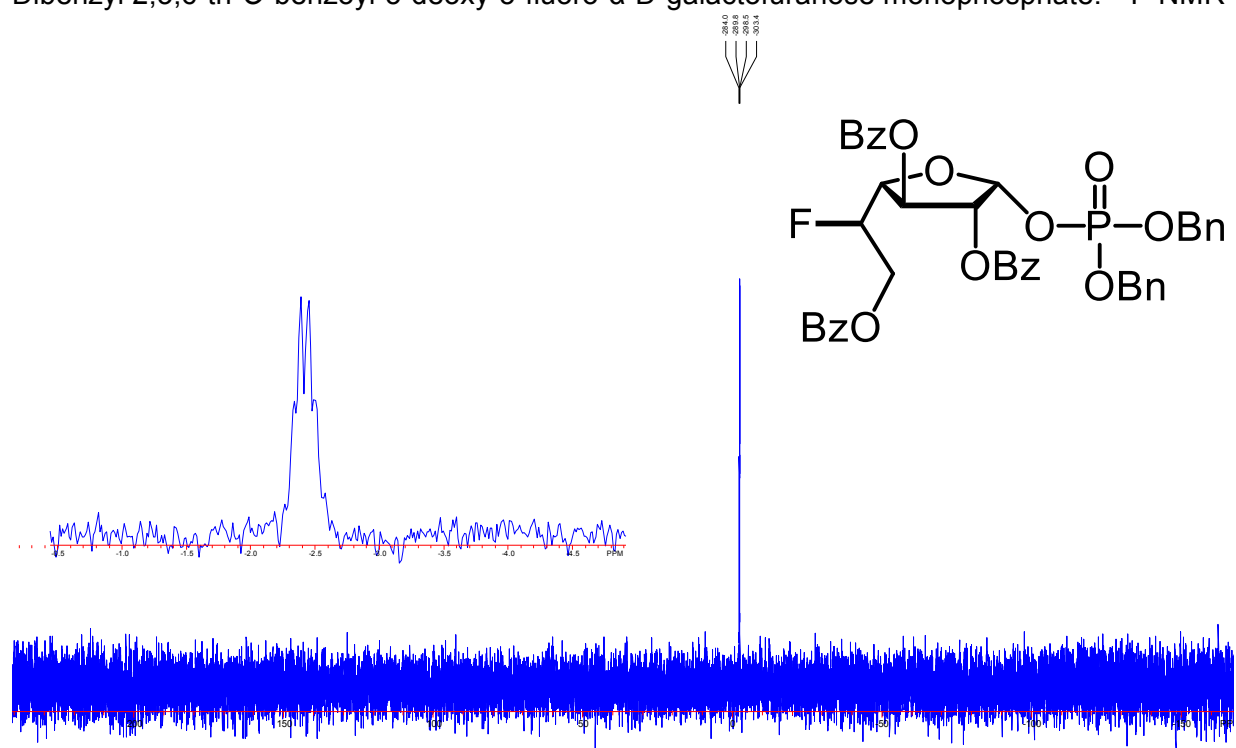



Triethylammonium 2,3,6-tri-O-benzoyl-5-deoxy-5-fluoro- $\alpha$ -D-galactofuranose monophosphate:  $^{19}\text{F}$  NMR

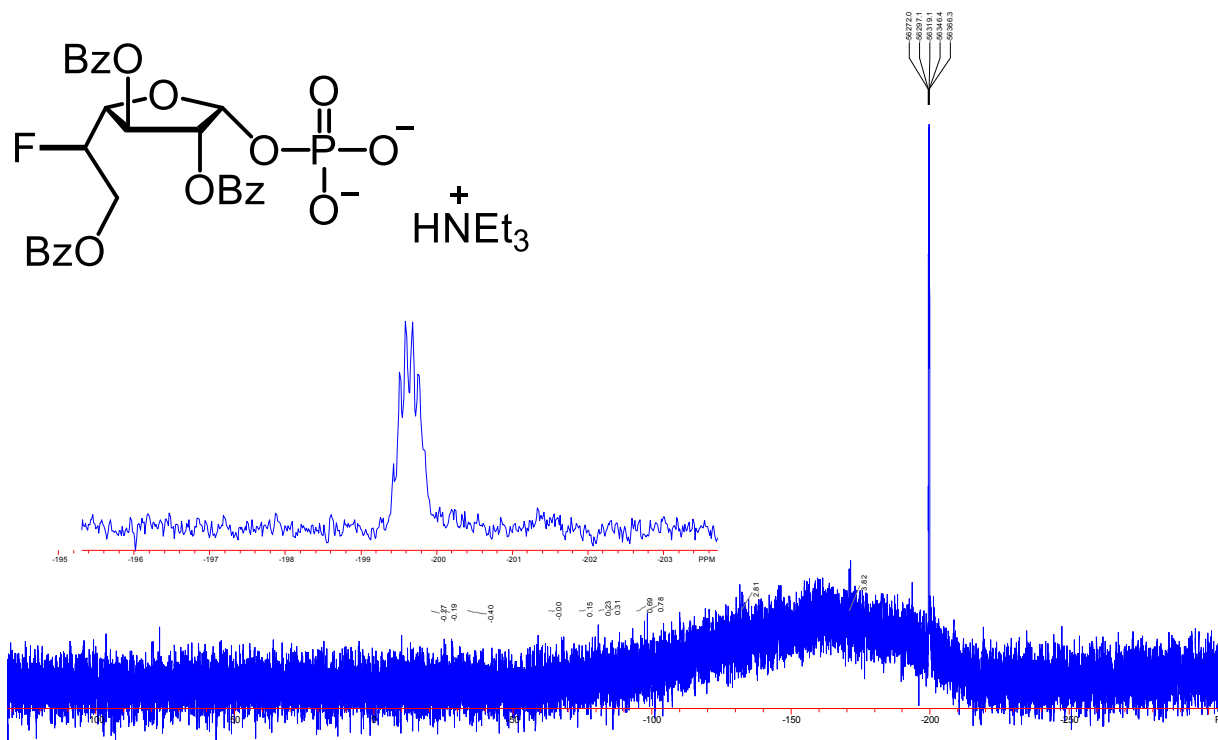

Triethylammonium 2,3,6-tri-O-benzoyl-5-deoxy-5-fluoro- $\alpha$ -D-galactofuranose monophosphate:  $^{31}\text{P}$  NMR

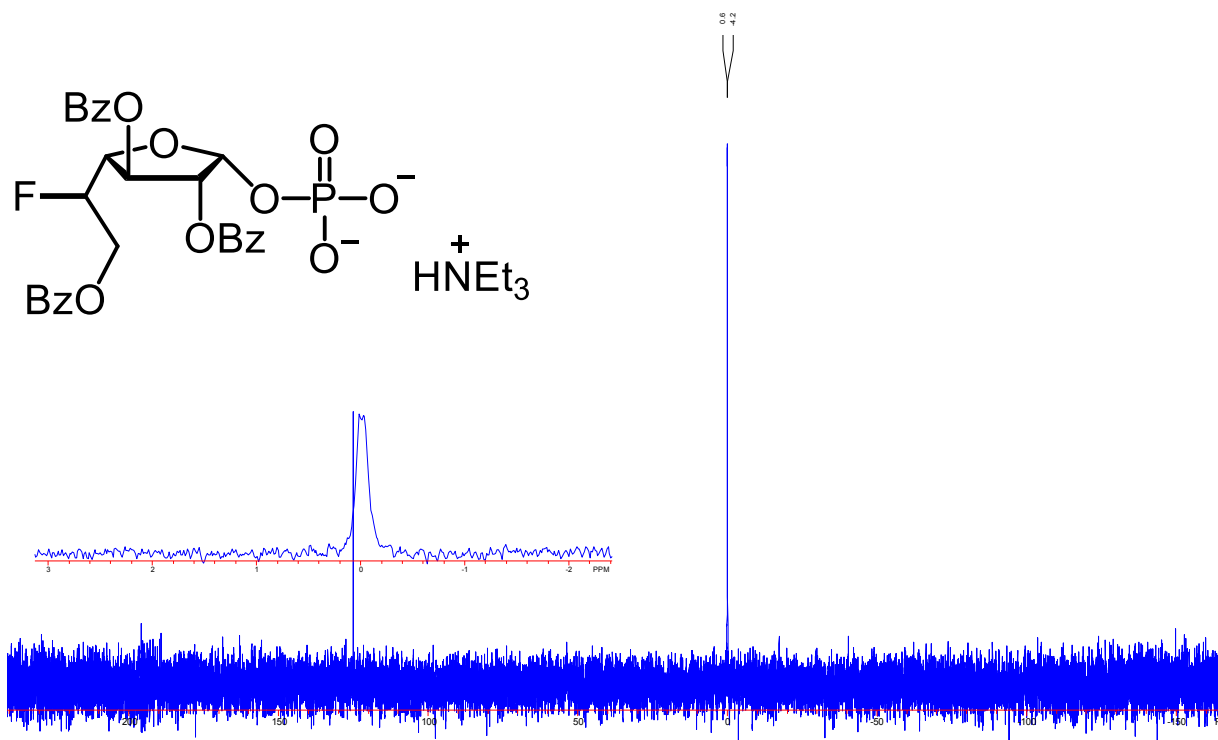

Triethylammonium 2,3,6-tri-O-benzoyl-5-deoxy-5-fluoro- $\alpha$ -D-galactofuranose monophosphate:  $^{13}\text{C}$  NMR

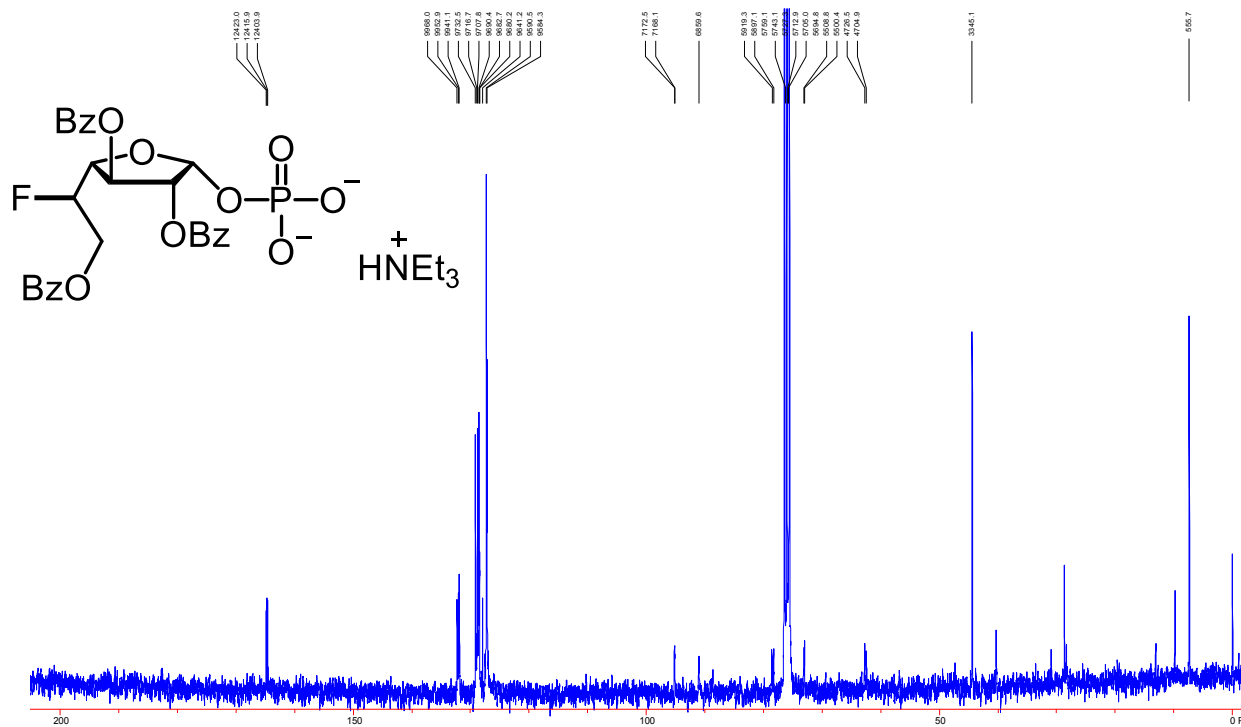

Tributylammonium 5-deoxy-5-fluoro- $\alpha$ -D-galactofuranose monophosphate:  $^1\text{H}$  NMR

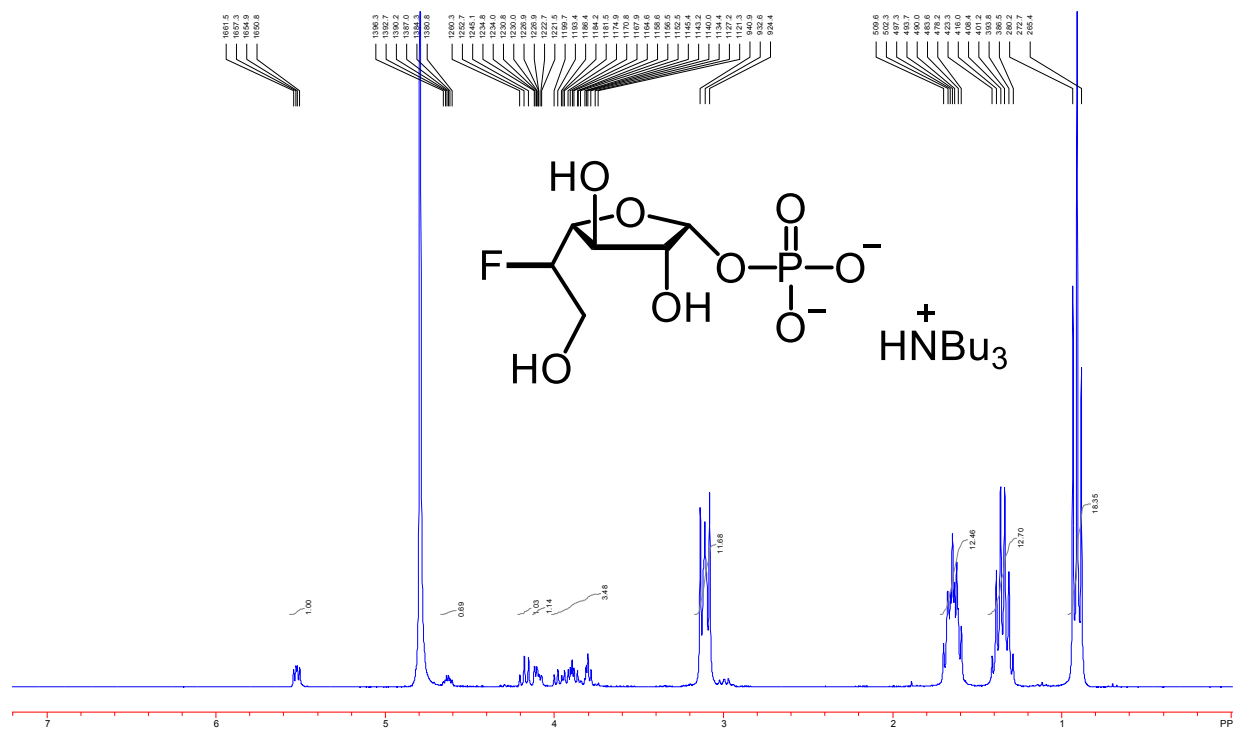Tributylammonium 5-deoxy-5-fluoro-α-D-galactofuranose monophosphate: <sup>19</sup>F NMR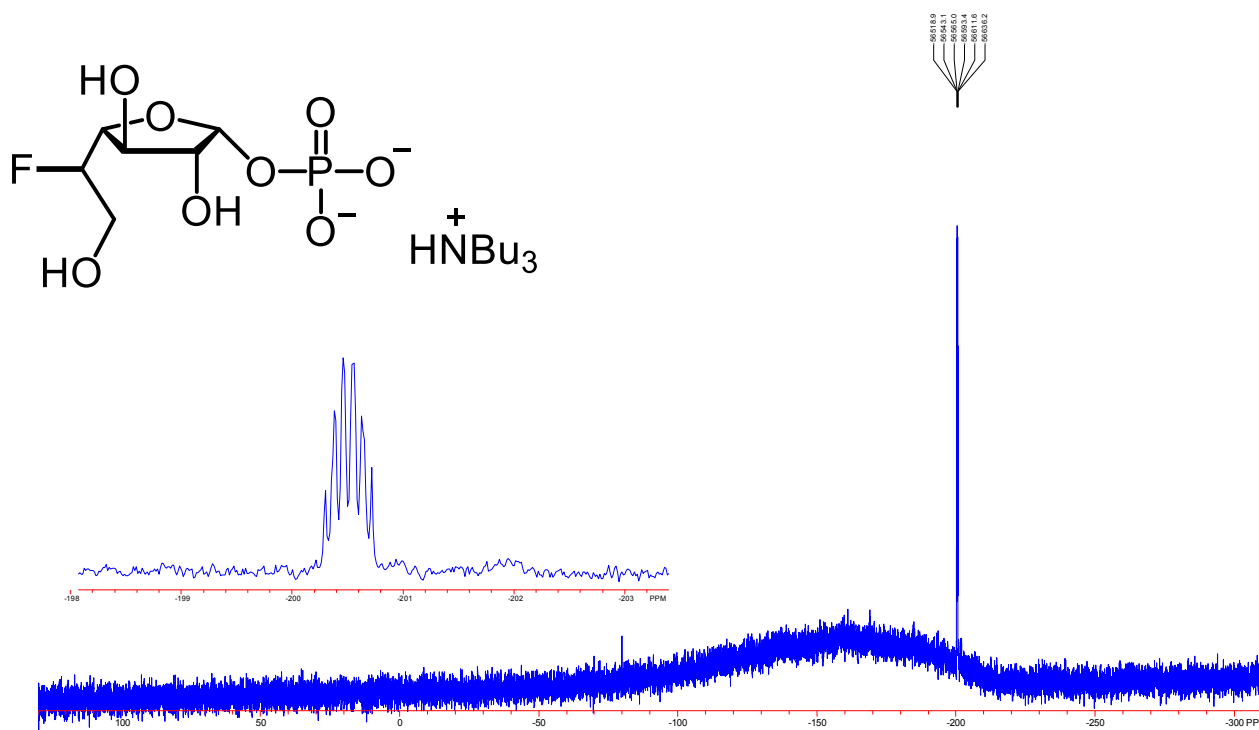Tributylammonium 5-deoxy-5-fluoro-α-D-galactofuranose monophosphate: <sup>31</sup>P NMR

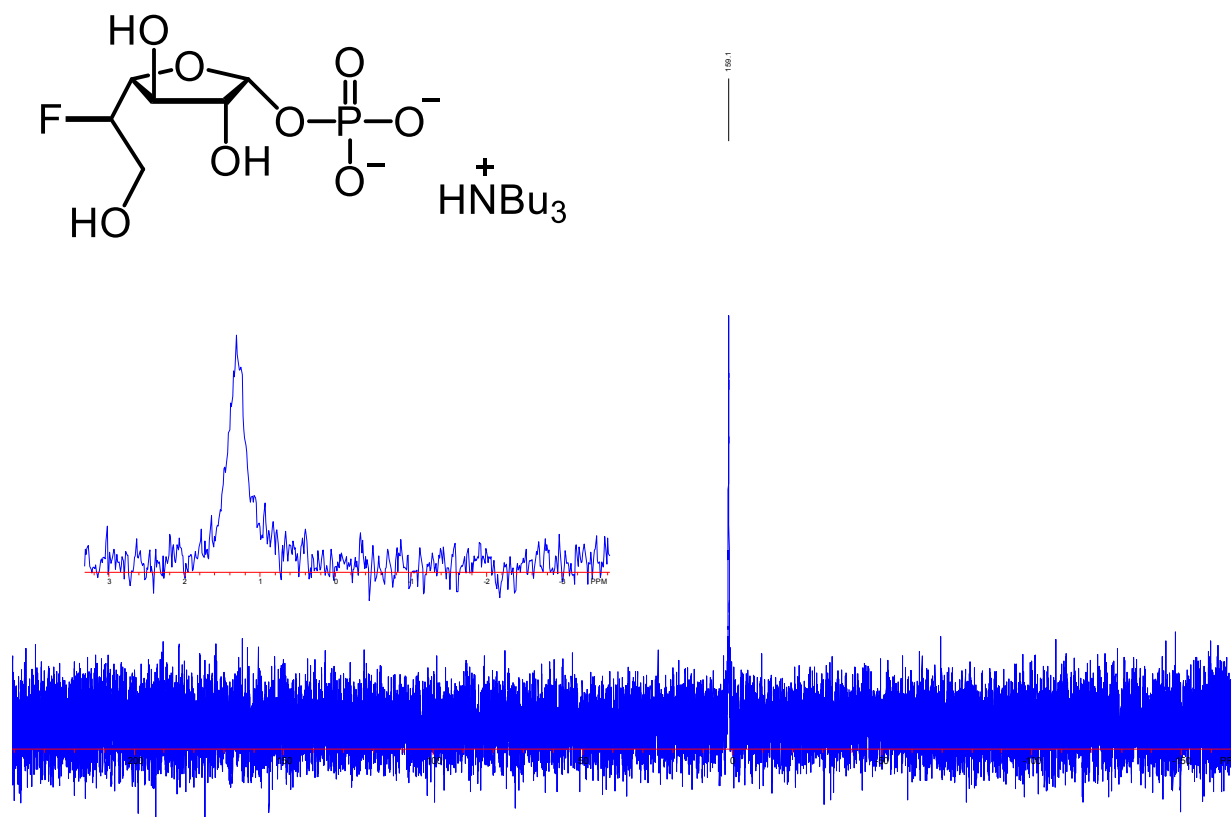

Tributylammonium 5-deoxy-5-fluoro- $\alpha$ -D-galactofuranose monophosphate:  $^{13}\text{C}$  NMR

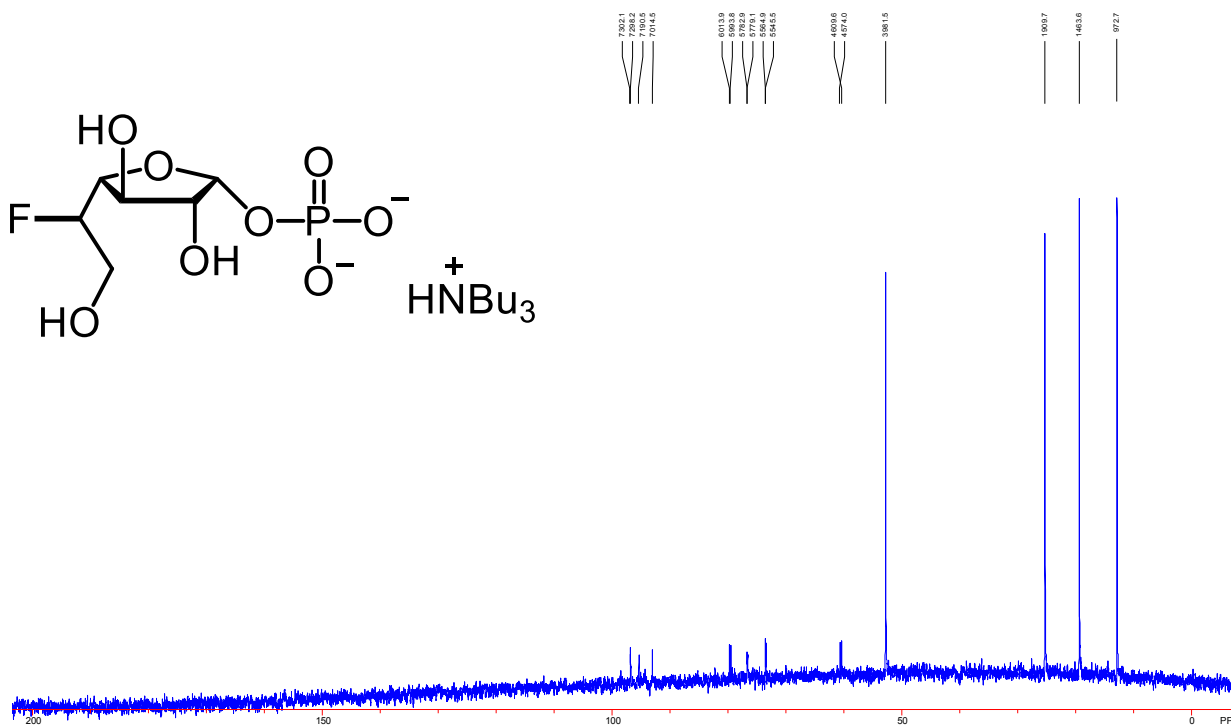

CDB-2-224C.001 (25-C)

UDP 5F-Galf (3):  $^1\text{H}$  NMR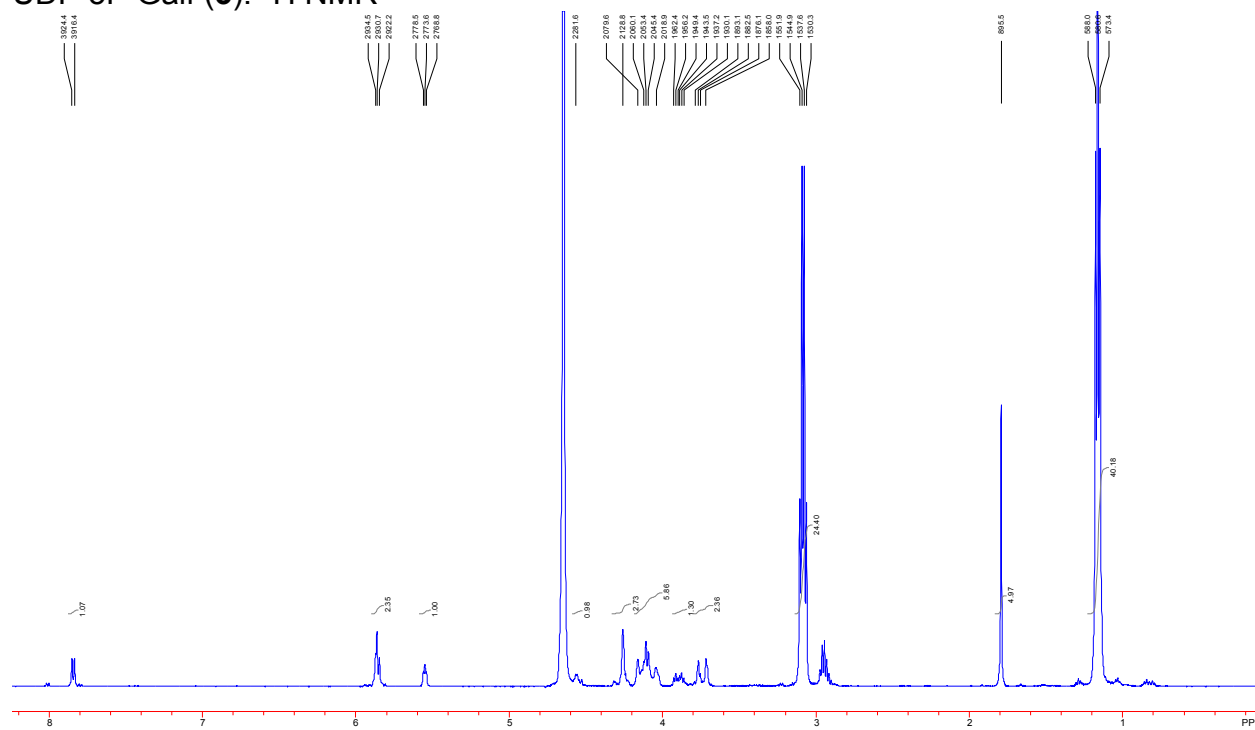UDP 5F-Galf (3):  $^{19}\text{F}$  NMR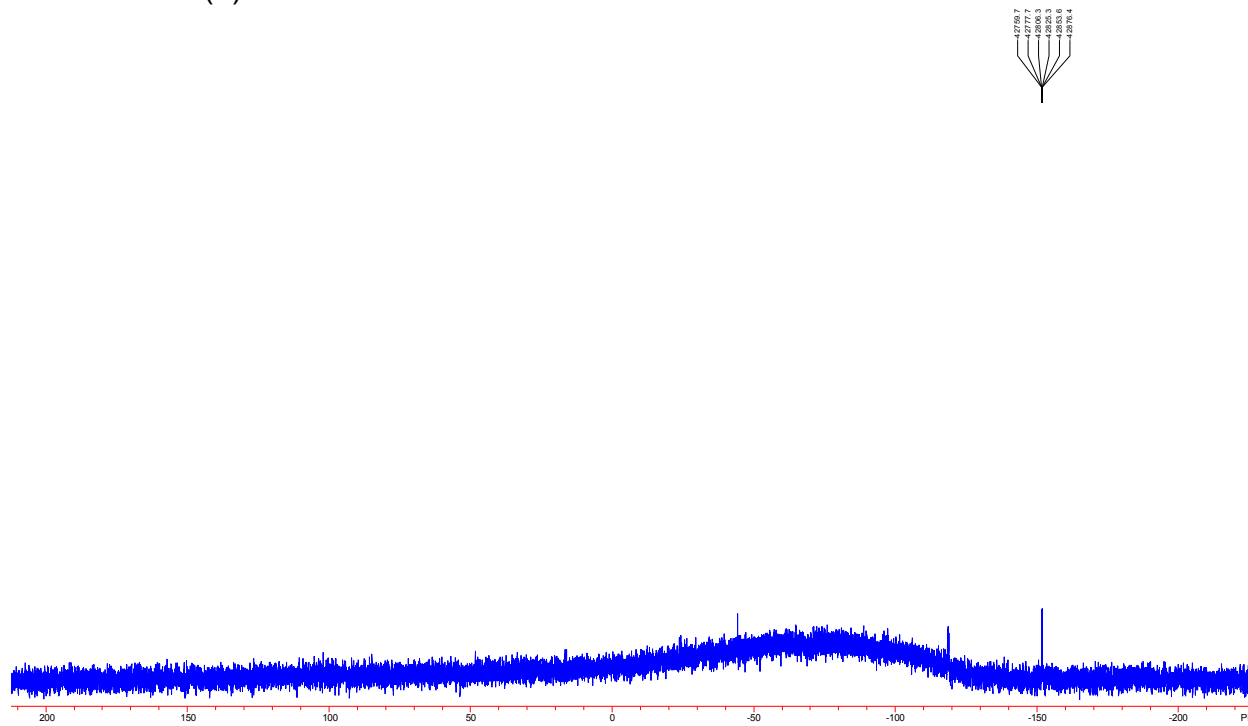

UDP 5F-Galf (3):  $^{13}\text{C}$  NMR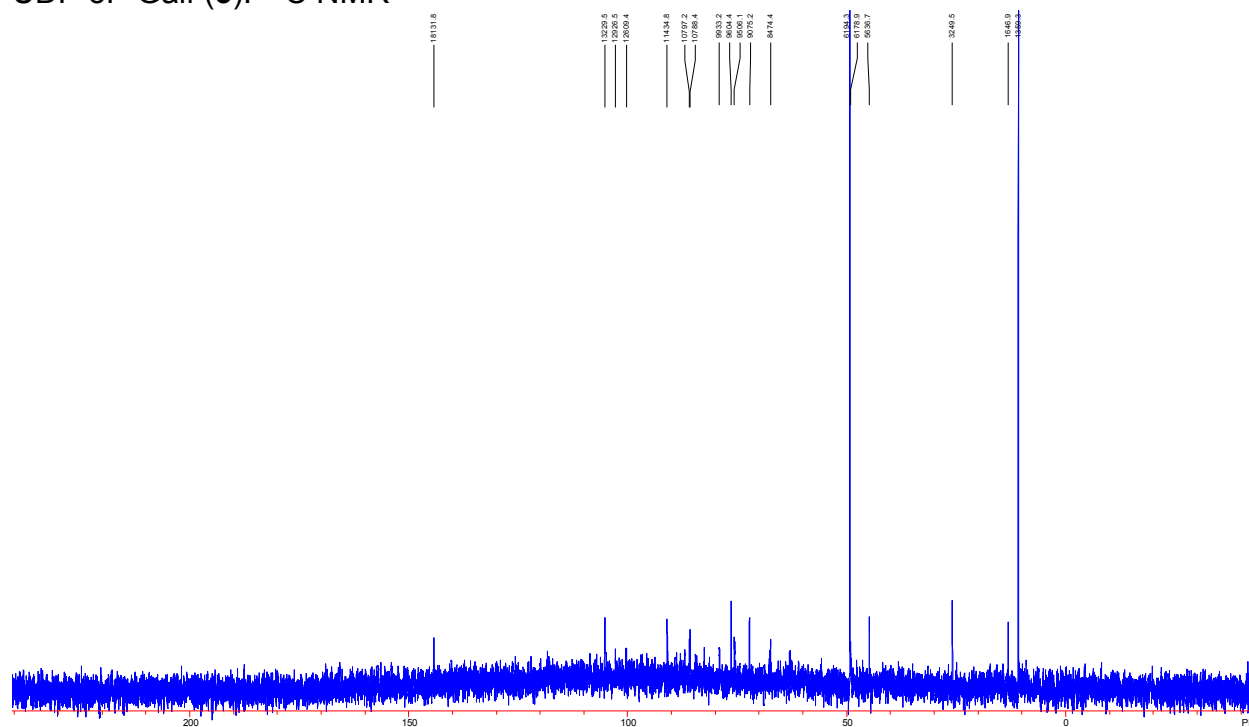

Supplement: NIHMS369868-supplement-1_si_001.pdf [file NIHMS369868-supplement-1_si_001.pdf]
